# Supplementary material
Source: PubMed Central journal article supplement (PMC3834849)
Supplement: ismej2013116x3.pdf [file ismej2013116x3.pdf]

**Vampires in the oceans: predatory cercozoan amoebae in marine habitats.**  
Cédric Berney, Sarah Romac, Frédéric Mahé, Sébastien Santini, Raffaele Siano, and  
David Bass

**Supplementary File 2**

**461 vampyrellid SSU-types obtained after clustering of the 2766 vampyrellid reads  
we identified in the BioMarKs V4 sequence data**

```
>B001_02
AGCTCCAATAGCGTATACTAACTTTGCTGCGGTTAAAATGCTCCTAGTCGAATTTGTGGA
TCTTTTGAGCGGAACCGACGCTGTTGCGAGCGTGTGCGTTTGTGCTCGAGATTCATCTTT
CTGGAGAAGTGTCTTCTGCTGTTAATTCAGTGGTTGTGCAATCCGGATCGTTTACTGTGAA
GAAATGAGAGTGTTCAAAGCAGGCTTTGATGCCTGAATCGATTAGCATGGAATAATGAGA
TAGGACTTTGATTCTATTTTGTGGCTTCGAGAACCAAAGTAATGATTGATAGGGACCGT
TGGGGGTGCTCGTATTCGGTGGGGAGCGGTGAAATGCACGGATCCACTGAAGACGGACTA
ATGCCAAAGCATTACCAAGGAGGTCTTCT
>B002_01
AGCTCCAATAGCGTATGTTAACATTGCTGCAGTTAAAATGCTCGTAGTCGAATTTTTGGT
TGTTAGAACTCCGTCTCGTCTTCAAGGACTTGTATGGATTGGTTCAACTCCATTCTTC
TGGTGTGCTGTGTTCTGTCCTTGATTGGGTGGTTCCGCAAACCAGATCATTTACTGTGAA
CAAATGAGATTGTTCAAAGAAGGCTTTTTTGAAGCCTGAATCTATTAGCATGGAATAATA
AGATATGACTTTTAGTCTATTTTGTGGCTTTTCGATTAAGAATAATGATTGATAGGGAC
CGTTGGGGGTGCTCGTATTCAGGGGGAGCGGTGAAATGCTTGGATCCTCTGAAGACGGA
CTAATGCCAAAGCATTACCAAGGAGGTCTTCT
>B003_01
AGCTCCAATAGCGTATGTTAACATTGCTGCAGTTAAAATGCTCGTAGTCGAATTTTTGGT
CGTTAGAACTCTGCCTGGCTCTTAGGAGTCTGTGCGGACTTGTTC AACGTCCATTCTTCT
GGCGTCTACTTCTGCTCTTGATTGGGTGGTCTACAAACCAGATCATTTACTGTGAACA
AATGAGGTTGTTCAAAGAAGGCTTTTTAAGCCTGAATCTATTAGCATGGAATAATAAGAT
AGGACTTTGGTCTATTTTGTGGCTTCTCGAATCAAAGTAATGATTGATAGGGACCGTT
GGGGGTGCTCGTATTCATGGGGGAGCGGTGAAATGCTTGGATCCTATGAAGACGAACTAA
TGCGAAAGCATTACCAAGGAGGTCTTCT
>B004_01
AGCTCCAATAGCGTATGTTAACATTGCTGCAGTTAAAATGCTCGTAGTCGAATTTTTGGT
GGTTAGAACTCCTACTGGTCTTAGGAACTTGCCTGGATGTTCAACCTCCATTCTTCTGG
CGTCTACTTTCTGCCCTTGATTGGGTGGTGTACAAACCAGATCATTTACTGTGAACAA
ATGAGATTGTTCAAAGAAGGCTTTTTAAGCCTGAATCTATTAGCATGGAATAATAAGATA
GGACTTTGGTCTATTTTGTGGCTTCTCGAACCTAAGTAATGATTGATAGGGACCGTTG
GGGGTGTCTGATTCATGGGGGAGCGGTGAAATGCTTGGATCCTCGGAAGACGGACTAAT
GCGAAAGCATTACCAAGGAGGTCTTCT
>B005_02
AGCTCCAATAGCGTATGTTAACATTGCTGCAGTTAAAATGCTCGTAGTCGAATTTTTGGA
TGTTAGAACTCCTCCTGGCTCTTAGGAGCTTGCCTCGATGTTCAACAACCATTCTTCTGG
CGTCTACTTTCTGCTCTTAGTTGGGTGGTGTACAAACCAGATCATTTACTGTGAACAA
ATGAGATTGTTCAAAGAAGGCTTTTTAAGCCTGAATCTATTAGCATGGAATAATAAGATA
GGACTTTGGTCTATTTTGTGGCTTCTCGAATCAAAGTAATGATTGATAGGGACCGTTG
GGGGTGTCTGATTCAGGGGGGAGCGGTGAAATGCTTGGATCCTCTGAAGACGGACTAAT
GCGAAAGCATTACCAAGGAGGTCTTCT
>B006_08
AGCTCCAATAGCGTATGTTAACATTGCTGCAGTTAAAATGCTCGTAGTCGAATTTTTGGA
TGTTAGAACTCCTCCTGGTCTTAGGACTTGCAGGATCTGTTC AACAACCATTCTTCT
AGCGTCGCACCTTTCTGCTCTTGATTGAGTGGGGGTGCAAACCTAGATCATTTACTGTGAA
CAAATGAGATTGTTCAAAGAAGGCTTTTTAAGCCTGAATCTATTAGCATGGAATAATAAG
ATAGGACTTTGGTCTATTTTGTGGCTTCTCGAATCAAAGTAATGATTGATAGGGACCG
TTGGGGGTGCTCGTATTCGGAGGGGAGCGGTGAAATGCTTGGATCCTCTGAAGACGGACT
AATGCCAAAGCATTACCAAGGAGGTCTTCT
>P001_05
AGCTCCAATAGCGTATATTAACCTTTGCTGCAGTTAAAAGCTCGTAGTCGAAATTTCTGGC
TTGTC AACTCGA ACTGCCTCCAATGGAGGTACGTATCGAMATGTTTGC GGGT CATCCTT
CTGGGGAGTGCTTCTGCCCTTAACTGGGTGTGTTGTACGATCCGGATCTTTTACTGTGAG
TAAATGAGAGTGTTC AAAGCAGGCTTATGCTTGAATCTTCTAGCATGGAATAATAAGAT
```

AGAACTTTGGTTTTGTTTTGTTGGCCATAGAACTAAAGTAATGATTGACAGGGACAGTTG  
GGGGTGCTCATATTGAGGGGCTAGCGGTGAAATGCGATGATCCCTTAAGATGAACTAAT  
CGCAAAGCATTACCAAGGATGTCTTCT  
>P002\_01  
AGCTCCAATAGCGTATATTAACCTTTGCTGCAGTTAAAAAGCTCGTAGTCTAACCTGTGGC  
TTTTCAAGCGGAGCCTTCCCAAACGGGATGCGCCTTGCTATGCTTGATAGCCATCATT  
TGGAGAGTGCTTCTGCCCTTCGTTGGGTGTGTTGTACGATCCAGATCTTTTACTGTGAGC  
AAATGAGAGTGTTCAAAGCAGGCTTTTAAAGCTTGAATCTTTTAGCATGGAATAATAAGAT  
AGAACTTCGGTTCGGTTTTGTTGGCCTTAGAACCAAAGTAATGATTGATAGGGACAGTTG  
GGGGTGCTCATATTGAGGGGCTAGCGGTGAAATGCAATGATCCCTGAAGATGAACTAAT  
CGCAAAGCATTACCAAGGATGTCTTCT  
>P003\_01  
AGCTCCAATAGCGTATATTAACCTTTGCTGCAGTTAAAAAGCTCGTAGTCTGAACCTTCTGGC  
TCAATCTACGCAAGCCGCCAATTGGGTGCGTTTGCTATGTAGATTAGCCATAATTCTG  
GGGAGTGTTTCTTCTTAATTGAGTGTGTACACGATTCAGAACCCTTTACTGTGAGCA  
AATGAGAGTGTTCAAAGCAGGCTTATGTTATGCTTGAATCTTTTAGCATGGAATAATGAT  
ATAGAACTTCGGTTTTATTTTGTGGCCATAGAACCAAAGTAATGATTGATAGGGACAGT  
TGGGGTGCTCATATTGAGGGGCTAGCGGTGAAATGCAATGATCCCTGAAGATGAACTA  
ATGCGAAAGCATTACCAAGGATGTCTTCT  
>P004\_33  
AGCTCCAATAGCGTATATTAACATTGCTGCAGTTAAAAAGCTCGTAGTCTGAATTTGTGGC  
CTTTCAGACCCGAACCGTTTTATTTTTATAGAACGCGTTTCGGAATGTCTGTGGGTCAAT  
CTTCTGAAGAATATTTCTGCCCTTGATTGGGATGGTTATACAATTCAGATCTTTTACTG  
TAGCAAAATGAAAGTGTTCAACGCAAGCTTCTGTGCTTGAATCTTTTAGCATGGAATAA  
TAATATAGAACTTTAGATCTATTTTGTGGCCTTAGAACCAAAGTAATGATTAATAGGGA  
TGGTTGGGGTGCTCATATTGAGGGGTTAGCGGTGAAATGCGATGATCCTCTGAAGATGA  
ACTAATGCGAAAGCATTACCAAGGACATCTTCT  
>P005\_07  
AGCTCCAATAACGTATATTAACGTTGCTGCAGTTAAAAAGCTCGTAGTCTGAATTTGTGTT  
CTCTCATACTCGAGCCGTCCATATATTGGACGCGCCTCTGAGTTTGAAGATCATCTCTCT  
GGAAAGCATCTCTGTACTTGATTGGATGGTTATGCAATTCAGAGCCTTTACTGTGAGCAA  
AGGAAAGTGTTCAAAGCAGGCATACTACCGCTTGAATCTTTTAGCATGGAATAATAATAT  
AGAACTTCGGTTTTATTTTGTGGCCATAAAAACCAAAGTAATGATTGATAGGGATGGTTG  
GGGGTGCTCGTATTGCGGGGCTAGCGGTGAAATGCAATGATCCCGAAGACGAACAAAT  
CGCAAAGCATTACCAAGGACATTTTCT  
>P006\_01  
AGCTCCAATAGTGTATACTAATGTTGCTGCAGTTTAAAAGCTCGTAGTCTGAACCTTCTGAT  
CTGTCAAACCTCGTACTATCTTTCAAAGAAGGATACGATACGGAATTGTTTGTGGATCATC  
TTTCTGGAGAGTACTTCTGCCCTTGATTGGGTGGTTGTAAGATCTAGATCTTTTACTGT  
GAGCAAATGAGAGTGTTCAAAGCAGGCTTTAAGCTATGCTTGAATCTTTTAGCATGGAAT  
AATAAGATAGAACTTTGGTTCTTTTTGTTGGCCATTAGAACTAAAGTAATGATTGAAAG  
GGATAGTTGGGGTGCTCGTATTGAGGGGTTAGCGGTGAAATGCAATGATCCTCTGAAGA  
CGGACTAATGCGAAAGCATTACCAAGGATATCTTCT  
>P007\_02  
AGCTCCAATAGCGTATATTAACCTTTGCTGCAGTTAAAAAGCTCGTAGTCTGAATTTCTGGT  
CTACAAACGCGAGCCATCTTTTCTTAAAAGACGGTCTCGAATTGTTTGTGGCCATCCT  
TCTGGTAAGTATTTCTGCTCTTAATTGGGTGTGTTTATATAATCCGGATCTTTTACTGTG  
AGCAAATGAGAGTGTTCAAAGCAGGCTTTATGCAATGCTTGAATCTTTTAGCATGGAATA  
ATAAGATAGAACTTCTGTTCTGTTTTGTTGGCCATAGAACTAAAAGTATGATTGAAAGGG  
ATAGTTGGGGTGCTCATATTCTGGGGTTAGCGGTGAAATGCTATGATCCTCTGAAGATG  
GACTAATGCGAAAGCATTACCAAGGATATCTTCT  
>P008\_01  
AGCTCCAATAGCGTATATTAACCTTTGCTGCAGTTAAAAAGCTCGTAGTCTGAATTTCTGGT  
CCGCAGACGCGAGCCATCTTTTCTTAAAAGACGGTCTCGAATTGTTTGTGGGCCATCTT  
TCTGGTTAGTGCTTCTGCCCTTAATTGGGTGCGTTGTACGATCCGGATCTTTTACTGTGA  
GCAAATGAGAGTGTTCAAAGCAGGCTTTATGCAATGCTTGAATCTTTTAGCATGGAATAA  
TAAGATAGAACTTCTGTTCTATTTTGTGGCCATAGAACTAAAAGTATGATTGAAAGGGA  
TAGTTGGGGTGCTCATATTGAGGGGTTAGCGGTGAAATGCTATGATCCTCTGAAGATGA  
ACTAATGCGAAAGCATTACCAAGGATATCTTCT  
>P009\_01  
AGCTCCAATAGCGTATATTAACCTTTGCTGCAGTTAAAAAGCTCGTAGTCTGAATTTCTGGT  
CTGCAGACGCGAGCCATCTTTTCTTAAAAGGCGGTCTCGAATTGTTTGTGGGCCATCTT  
TCTGGAAAGCCTTCTGCCCTTAATTGGGTGTGTAGTGGATCCGGATCTTTTACTGTGA  
GCAAATGAGAGTGTTCAAAGCAGGCTTTATGCAATGCTTGAATCTTTTAGCATGGAATAA

TAAGATAGAACTTCTGTTCTATTTTGTGGCCATAGAACTAAAGTGATGATTGAAAGGGA  
TAGTTGGGGGTGCTCATATTTCTGGGGTTAGCGGTGAAATGCTATGATCCTCTGAAGATGG  
ACTAATGCGAAAGCATTACCAAGGATATCTTCT  
>P010\_01  
AGCTCCAATAGCGTATATTAACCTTTGCTGCAGTTAAAAAGCTCGTAGTCAAATTTCTGAT  
CTATAAECTCGAACTATTTTATCTTAATAGAATATGTTTCGAAATTGTTTGTAGATCATC  
ATTCTAGAAAGTATATCTGTCCTTAATTGGATGTGTTATATAAATCTAGATCTTTTACTGT  
GAGCAAATGAGAGTGTCAAAGCAAGCTTTATGTTATGCTTGAATCTTTTAGCATGGAAT  
AATAAGATAGAACTTTTATCTATTTTGTGGCCATAGAATAAAGTGATGATTGATAGG  
GATAGTTGGGGGTGCTCATATTCAGTGGTTAGCGGTGAAATGCTATGATCCTCTGAAGAT  
GAACTAATGCGAAAGCATTACCAAGGATATCTTCT  
>P011\_01  
AGCTCCAATAGCGTATATTAACCTTTGCTGCAGTTAAAAAGCTCGTAGTCAAATTTCTGAT  
TTATAAECTCGAATCATTTTATCTTAATAAGGTGATTTTCGAAATTGTTTGTAGATCATC  
ATTCTAGAAAGTATATCTGCCCTTAATTGGGTGTGTTATATAAATCTAGATCTTTTACTGT  
GAGCAAATGAGAGTGTCAAAGCAAGCTTTATGTTATGCTTGAATCTTTTAGCATGGAAT  
AATAAGATAGAACTTTTATCTATTTTGTGGTCATAGAACTAAAGTGATGATTGATAGG  
GATAGTTGGGGGTGCTCATATTCAGTGGTTAGCGGTGAAATGCTATGATCCTCTGAAGAT  
GAACTAATGCGAAAGCATTACCAAGGATATCTTCT  
>P012\_05  
AGCTCCAATAGCGTATATTAACCTTTGCTGCAGTTAAAAAGCTCGTAGTCAAATTTCTGAT  
TTATAAECTCGTACCATTTTATCTTAATAAGATGCGTTACGAAATTTGTTTGTAGATCATC  
CTTCTAGAAAGTATATCTGCCCTTAATTGGGTGTGTTATATAAATTTAGATCTTTTACTGT  
GAGCAAATGAGAGTGTCAAAGCAAGCTTTATGTTATGCTTGAATCTTTTAGCATGGAAT  
AATAAGATAGAACTTTTATCTATTTTGTGGCCATAGAATAAAAGTGATGATTGATAGG  
GATAGTTGGGGGTGCTCATATTCAGTGGTTAGCGGTGAAATGCTATGATCCTCTGAAGAT  
GAACTAATGCGAAAGCATTACCAAGGATATCTTCT  
>P013\_22  
AGCTCCAATAGCGTATATTAACCTTTGCTGCAGTTAAAAAGCTCGTAGTCAAATTTCTGAT  
CTATAAECTCGTACYATTTTATCTTAATAAAATGYGTTTCGAAATCTGTTTGTAGATCATC  
CTTCTAGAAAGTATATCTGCCCTTAATTGGGTGTGTTATATAAATTTAGATCTTTTACTGT  
TGAGCAAATGAGAGTGTCAAAGCAAGCTTTATGTTATGCTTGAATCTTTTAGCATGGAAT  
AATAAGATAGAACTTTTATCTATTTTGTGGCCATAGAATAAAAGTGATGATTGATAGG  
GGATAGTTGGGGGTGCTCATATTCAGTGGTTAGCGGTGAAATGCTATGATCCTCTGAAGA  
TGAACTAATGCGAAAGCATTACCAAGGATATCTTCT  
>P014\_02  
AGCTCCAATAGCGTATATTAATTTGCTGCAGTTAAAAAGCTCGTAGTCAAATTTCTGAT  
CCCGAGTGTGGACCATCCTTTAGGGGATGTGACTGCAAACCTCGTGGGTCATCCTCCTGAA  
GCGAGTTGCTGTCTTAATTGGGTGGTATCTCTATTCGGGTCATTTACTGTGAACAAATG  
AGGGTGTCAAAGCAAGTTTTTGTGCTTGAATCTCTTAGCATGGAATAATAAGATACAAC  
TTCGGTAGTACTTTGTTGGCTATACAACCAAAGTGATGATTGAAAGGGATAGTTGGGGGT  
GCTCGTATTCAGGGGCTAGCGGTGAAATGCGATGATTCCTGAAAGACGGACTAATGCGAA  
AGCATTACCAAGGATATCTTCT  
>P015\_02  
AGCTCCAATAGCGTATATTAATTTGCTGCAGTTAAAAAGCTCGTAGTCGGACATTACC  
TCTCTGAGCACGAATCAACCTAAATGGGTTTGCATTCGATAAGCTCAAGAGGTGTAATTT  
TGAATATGTTTCTGCCCTTGATTGGGTGGAAGCATGTTTCAAACCGTTTACTGTGAAC  
AAATGAGAGTGTCAAAGCAGGCGTTTACGCTTAAATTTTTTAGCATGGAATAATAATA  
TAAGACTTCGGTTTTTATTTTGTGGCCATAAGACCAAAGTAATGATTGACAGGGATAGTT  
GGGGGTGCTCGTATTCAGGGGCTAGCGGTGAAATGCGATGATTCCTGAAAGACGAACTAA  
TGCGAAAGCATTACCAAGGATATCTTCT  
>P016\_01  
AGCTCCAATAGCGTATATTAACCTTTGCTGCAGTTAAAAAGCTCGTAGTCAAATTTCTGCC  
TCGCAGGCTCGATCATGCTAATGGTATGGTTCGAAAGCCTGTGGGCATCTTTTCAAATG  
NACAACNTCNNNNNNNNNNNNGTGTACNNTTGAATCTTTTACTGTGAGCAAATGAAA  
GTGTTCAAAGCAAGCTCAATAACTGCTTGAATCTTTTAGCATGGAATAATAAGATAAAAC  
TCGGTTTTTATTTGTTGGCCATAAGACCTAAGTAATGATTGAAAGGGATAGTTGGGGGTG  
CTCGTATTTGAGGCTAGCGGTGAAATGCAATGATTCTCTAAAGACGAACTAATGCGAAA  
GCATTACCAAGGATATTTTCT  
>P017\_01  
AGCTCCAATAGCGTATATTAACCTTTGCTGCAGTTAAAAAGCTCGTAGTCAAATTTCTGTT  
TCGCCGAGTCATACAAGCCTATGGATTGTTTTGATACATCGGTGAGGCATCTTTTCAAAC  
GGCGCCTCTGCTTAACTGGGTGGTTGCGACCTTTGAATCTTTACTGTGAGCAAATGA  
AAGTGTCAAAGCAAGCTCAACTGCTTGAATCTTTTAGCATGGAATAATAAGATAAACT

CTGGTTTTGTTTTGTTGGCCATAAAACCTAAGTAATGATTGAAAGGGATAGTTGGGGGTG  
CTCGTATTCAGAGGCCAGCGGTGAAATGCAATGACTCTCTGAAGACGAACTAATGCGAAA  
GCATTCACCAAGGATATTTTTCT  
>P018\_01  
AGCTCCAATAGCGTATATTAACCTTTGCTGCAGTTAAAAAGCTCGTAGTCGAATTTCTGTT  
CCGCGAGTCATGCAAGCCAATGGCTGTCTTGATACGTCGGCGGGGCATCCTTCCAAAC  
GGCGCCTCTGCCCTTAACTGGGTGGTTGCGACCTTTGGATCCTTTACTGTGAGCAAATG  
AAAGTGTTCAAAGCAAGCTCAAACCTGCTTGAATCTTTTAGCATGGAATAATAAGATAAAA  
CTCTGGTTTTGTTTTGTTGGCCATAAAACCTAAGTAATGATTGAAAGGGATAGTTGGGGG  
TGCTCGTATTCAGAGGCTAGCGGTGAAATGCAATGATTCTCTGAAGACGAACTAATGCGA  
AAGCATTACCAAGGATATTTTTCT  
>P019\_01  
AGCTCCAATAGCGTATATTAACCTTTGCTGCAGTTAAAAAGCTCGTAGTCGAATTTCTGTT  
CCGCGAGTCATGCAAGCCAATGGCTGTCTTGATACATTGGCGGGGCATCATTTCAAAC  
GGCGCCTCTGCCCTTAACTGGGTGGTTGCGACCTTTGAATCCTTTACTGTGAGCAAATG  
AAAGTGTTCAAAGCAAGCTCAAACCTGCTTGAATCTTTTAGCATGGAATAATAATATAAAA  
CTCTGGTTTTGTTTTGTTGGCCATAAAACCTAAGTAATGATTGAAAGGGATAGTTGGGGG  
TGCTCGTATTCAGAGGCTAGCGGTGAAATGCAATGATTCTCTGAAGACGAACTAATGCGA  
AAGCATTACCAAGGATATTTTTCT  
>P020\_01  
AGCTCCAATAGCGTATATTAACCTTTGCTGCAGTTAAAAAGCTCGTAGTCGAATTTCTGCC  
CCGCAGACCCCTCCCAGTTAAGAAGCTGGGGCCTGGGTGCGTGTGGGGTATCATTCTAAAC  
AGCATCTCTGCCCTTGATTGGGTCGGTTATGAGGTTTGGAACGTTTACTGTGAGCAAATG  
AAAGTGTTCAAAGCAAGCTTTATAAAGTGCCTTGAATCTTTTAGCATGGAATAATAAGATA  
AAACTCTGGTTTTGTTTTGTTATTGGCTTTTAAACCTAAGTAATGATTGAAAGGGATAGT  
TGGGGGTGCTCGTATTCAAAGGCTAGCGGTGAAATGCGATGATTCTTTGAAGACGAACTA  
ATGCGAAAGCATTACCAAGGATATTTTTCT  
>P021\_04  
AGCTCCAATAGCGTATATTAACCTTTGCTGCAGTTAAAAAGCTCGTAGTCTAATTTCTGTC  
TAGCATACTCATGTCAAGTAAGTACTGATTATGAATGTTTTGTGAGGCATCTTTCCAAAT  
AACACTTCTGCTCTTGATTGAGTTGGTTGTGGGATTCGGATCTTTACTGTGAGCAAATG  
AAAGTGTTCAAAGCAAGCTTTAACTGCTTGAATCTTTTAGCATGGAATAATAAGATAAAA  
CTCTGGTTTTTATTCTGTTGGCCATAAAACCTAAGTAATGATTGAAAGGGATAGTTGGGGG  
TGCTCGTATTCAAAGGCTAGCGGTGAAATGCGATGATTCTTTGAAGACGAACTAATGCGA  
AAGCATTACCAAGGATATTTTTCT  
>P022\_04  
AGCTCCAATAGCGTATATTAACCTTTGCTGCAGTTAAAAAGCTCGTAGTCTAACTTCTGTC  
TCGCAGAGTCATGTCAAGTCAAGGACTGACTATGATTTTTTCGGCGGGACATCTTTCTGAAA  
TGCCTTCTGCCCTTGGTTGGGTGGTTGTGAACCTTTAGATCATTACTGTGAGCAAAG  
AAAGTGTTCAAAGCAGGCTCAGATGCTTGAATCTTTTAGCATGGAATAATAAGATAAAAC  
TCTGTTTTGTTTTGTTGGCAATAAAACCTAAGTAATGATTGATAGGGATAGTTGGGGGTG  
CTCGTATTCAAAGGCTAGCGGTGAAATGCAATGATTCTTTGAAGACGAACTAATGCGAAA  
GCATTCACCAAGGATATTTTTCT  
>P023\_01  
AGCTCCAATAGCGTATATTAACCTTTGCTGCAGTTAAAAAGCTCGTAGTCTAATATCTGTT  
TCGCAGTCTCATTTCAAGTCAAGGACTAATTTGAGGATACTGTGAAGCATCTTTTCGAATT  
ACATTTCTGCCATTGATTTGGTTGGTTTTGAAGTTTGAATTTTACTGTGAGCAAATGA  
AAGTGTTCAAAGCAGGCTCAATGATTGCTTGAATCTTTTAGCATGGAATAATAATATAAAA  
ACATAGTTTTTATTTTGTGGCCTAGAAACCTAAGTAATGATTGAAAGGGATAGTTGGG  
GTGCCCGTATTCAAAGTTTAGCGGTGAAATGCAATGATTCTTTGAAGACGAACTAATGCG  
AAAGCACTTACCAGGATATTTTTCT  
>P024\_01  
AGCTCCAATAGCGTATATTAACCTTTGCTGCAGTTAAAAAGCTCGTAGTCGAATATCCGTG  
TCGTTCTAGCCTTTCTAGTTTAAATGATCTAGATGGTGTCTTAGAACCCTTTATTCTAAA  
TGACATTTCCGCCCTTGATTGGGTGGTTTGAAGTTTGAATAATTTACTGTGAGCAAATG  
AAAGTGTTCAAAGCAGGCTCAATGAGGCTTGAATCTTTTAGCATGGAATAATAATATAAAA  
ACTTCGGTTTTTATTTTGTGGCTTTAAACCAAAGTGATGATTGATAGGAATAGCTGGGG  
GTGCTCGTATTCAAAGTTTAGCGGTGAAATGCAATGATTCTTTGAAGACCAACAAATGCG  
AAAGCAATGCACCAAGGATATTTTTCT  
>P025\_26  
AGCTCCAATAGCGTATATTAACATTGCTGCAGTTAAAAAGCTCGTAGTCAAACCTTTTGGG  
TCTGCAGACTCGAATGTTCCGTAATCGGAATCAATTTTTAGTCTGCTGCCAAATTTCCA  
GAAAGATATGCTGTCCTTGATTGGATGGTATTATCAACTCTGGTCTTTTACTGTGAACA  
AATGAAAGTGTTCAAAGCAGGCACATATATGCTGAATCTTTTAGCATGGAATAATAAGA

TAAACTTTGGTTTTATTTTGGTTCATAGAACTAAAGTAATGATTGAAAGGGATGGTT  
GGGGTGCCTGATTTCAGGGGCTAGCGGTGAAATGCGATGATCCCTGAAGACGAACTAA  
TGCGAAAGCATTACCAAGGACATCTTCT

>P026\_01

AGCTCCAATAGCGTATATTAACATTGCTGCAGTTAAAAAGCTCGTAGTCAAACCTATTGCG  
ACCTAGATCTCAGTATTTTCAGTTTTATGAAATTACTGTTTGGTCCAAGTCGCTTTTTCTAA  
AGAATATCTCTGCACTTGATTGTATGGGGATCCTATTTAGATACTTTACTGTGAACAAAT  
GAGAGTGTCAAAGCAAGCTTATAGTATGCTTGAATCTTTTAGCATGGGATAATAAGATA  
AGACTTCGGTTCATTTTTGTTGGCCATAAAACCAAAGTAATGATTGAAAGGGACAGTTGG  
GGGTGCTCGTATTCAAGGGCTAGCGGTGAAATGCTATAATTCTTTGAAGACGAACTAATG  
CGAAAGCATTACCAAGGATGTTTTCT

>P027\_04

AGCTCCAATAGCGTATATTAATATTGCTGCAGTTAAAAAGCTCGTAGTCAAATTTACT  
TCCTTAGGCACGGGTCGTCTGATGGACGCACTCGATACGCCAAGGTGTTTTTGGCCG  
AAAGCACTCTTTTTCTTGATTGATTGGTTGCGCTATTCCGGCTTTTTACTGTGAACAAAT  
GAAAGTGTCAAAGCAAGCTGATTGAAAGCTTGAATCTTTTAGCATGGAATAATAAGATA  
AGACTCCGGTTTTGTTTTATTGGCCATAAAACTGAAGTAATGATTGAAAGGGATAGTTGG  
GGGTGCTCGTATTCAAGGGCTAGCGGTGAAATGCGATGATCCCTGAAGACGAACTAATG  
CGAAAGCATTACCAAGGATATCTTCT

>P028\_05

AGCTCCAATAGCGTATATTAATAATTGCTGCAGTTAAAAAGCTCGTAGTCAAATTTTGT  
ACTGTAGACACGGGCTCTCAATGAGTGTGCCCGGTACGCTACAGTGCTTTTTCTGT  
ACCTACCTCTTTTTCTTAATTGATTGGTTGTAGTGTTTAGGTCATTTACTGTGAACAAAG  
AAAGTGTCAAAGCAGGCATTTATGCCTGAATCTTTTAGCATGGAATAATAAGATAAGC  
TCCGGTTTTGTTTTATTGGCAATAAGACTGAAGTAATGATTGAAAGGGATAGTTGGGGT  
GCTCGTATTCAAGGGCTAGCGGTGAAATGCGATGATTCTCTGAAGACGAACTAATGCGAA  
AGCATTACCAAGGATATCTTCT

>P029\_01

AGCTCCAATAGCGTATATTAACATTGCTGCAGTTAAAAAGCTCGTAGTCAAACCTTTGAC  
GTCTTGAACACGAGTCTTCCGTATGGAATAGATCTCGATTAGTTTTCGACTCTTTTTCT  
GGAAAGTGCTTCTGTCTTGATTGGGTGGTTGTACAATTCAGGTCTTTTACTGTGAACAA  
ATGAAAGTGTCAAAGCAAGCTTTTTAGTATGCTTGAATCTTTTAGCATGGAATAATAAG  
ATAGAATTTGGTTTTATTTTGGTGGCCGATTACTAAAGTAATGATTGAAAGGGATGGTT  
GGGGGTGCTCGTATTCTGGGGCTAGCGGTGAAATGCGATGATCCCTGAAGACGAACTAA  
TGCGAAAGCATTACCAAGGACATCTTCT

>P030\_01

AGCTCCAATAGCGTATATTAATAATTGCTGCAGTTAAAAAGCTCGTAGTCAAATTTCTGCT  
GTTGGAAGCACGAACTCACCGTTAACTGGTGAGGTTTCGAATTGCTTCCGACGCTTTTTCT  
ATGGAAGGTGCTTCTGCCCTTGATTGGGTGGTTGTGCACTTCATGTCTTTTACTGTGAAC  
AAATGAAAGTGTCAAAGCAAGCTCAAAAATATGCTTGAATCTTTTAGCATGGAATAATAA  
GATAAACTCTGGTTTTATTTTGGTGGCCATTAACCAAAGTAATGATTGATAGGGATGG  
TTGGGGGTGCTCGTATTCAAGGGCTAGCGGTGAAATGCGGTGATTCTTGAAGACGAACT  
AATGCGAAAGCATTACCAAGGACATTTTTCT

>P031\_04

AGCTCCAATAGCGTATATTAACATTGCTGCAGTTAAAAAGCTCGTAGTCAAATGTCTGAT  
ACCGTAAACACGAGTCTTCCATTGATGGATTGATCTCGATTAGTTTTCGGTACTTTTTCT  
TAGATGACGCAACTGTCCTTGATTGGGTGGTTGTGTTTTCTGGTCCCTTACTGTGAACA  
AATGAAAGTGTCAAAGCAAGCTTCTATTTTGGTGAATCTTTTAGCATGGAATAACAAG  
ATAAACTCTGGTTTCATCTTGTGGCCATTAACCAAAGTAATGATTGATGGGGATGGT  
TGGGGGTGCTCGTATTCAAGGGCTAGCGGTGAAATGCGATGATCCCTGAAGACGAACTA  
ATGCGAAAGCATTACCAAGGACATTTTTCT

>P032\_01

AGCTCCAATAGCGTATATTAACATTGCTGCAGTTAAAAAGCTCGTAGTCAAATGTATGAT  
CTGATAGATAAGAGTCTTCCAAATGGAATTGATCTCGTTATCCATGGATCTTTTTCTGT  
CGTGTGCTCTTTTTCTTAGATGAAAGTTGTATGACGCAGGTCTTTTACTGTGAACAAAT  
GAAAGTGTCAAAGCAAGCTTATATGCTTGAATCTTTTAGCATGGAATAATAAGATAAA  
ACTGTGGTTTTATTTTGGTGGCCATAAAACCAAAGTAATGATTGAAAGGGATGGTTGGGG  
TGCTCGTATTCAAGGGCTAGCGGTGAAATGCGATGATCCCTGAAGACGAACTAATGCGA  
AAGCATTACCAAGGACATTTTTCT

>P033\_01

AGCTCCAATAGCGTATATTAACATTGCTGCAGTTAAAAAGCTCGTAGTCAAATTTATGAC  
CTAATAAGCCCAAGTCTTCCAAATTTGGAATTGATCTTGGTTGCATATAGGTCTTTTTCT  
TGCAGCGTACTCTTTTTCTTAATTGATTGGTTGTATGACTCAGGTCTTTTACTGTGAACA  
AATGAGAGTGTCAAAGCAAGCGTATTTTGGTGAATCTTTTAGCATGGAATAATAATGAT

AAAAC TACGGT TTTTTCTATTGGCCATAAAAATCGAAGTAATGATTGACAGGGATGGTTG  
GGGGTGCTCGTATT CAGGGGCTAGCGGTGAAATGCGATGATCCCTGAAGACGAACTAAT  
GCGAAAGCATT CACCAAGGACATCTTCT  
>P034\_04  
AGCTCCAATAGCGTATATTAACATTGCTGCAGTTAAAAAGCTCGTAGTCAAATTTATGGC  
CTTGCGTTGCCGAGTCTTCCGAATTTGGAATTGATCTCTGGCGATGCAGGTTTTTCTTCC  
GCTGGGCAC TTTCTTCTTAATTGATTTGTTGTGTTACTCGGATCTTTTACTGTGAACA  
AATGAAAGTGTTC AAAGCAAGCGCATTATGCTTGAATCTTTTAGCATGGAATAATGAGAT  
AGA ACTATGGTTTTATTTTATTGGCCATAAAGCCAAAGTAATGATTGAAAGGGATGGTTG  
GGGGTGCTCGTATT CAGGGGCTAGCGGTGAAATGCGATGATCCCTGAAGACGAACTAAT  
GCGAAAGCATT CACCAAGGACATCTTCT  
>P035\_02  
AGCTCCAATAGCGTATATTAAC TTTGCTGCAGTTAAAAAGCTCGTAGTCAAATGTATGAA  
CTCTGAAACGCGAGTCTTCCGATCATCGGAACTGAACTCGAATCGTTACAAGTCTTTTT  
CCTGGAGAATGCTTTCTGCTCTTAATTGAATGGTTGCATAACTCAGGTCTTTTACCGTGA  
ACAAATGAAAGTGTTC AAAGCAAGCTTACAGTGTGCTTGAATCTTCTAGCATGGAATAAT  
AAGATAAAACTGTGGTTTTGTTTTGTTGGCCATAAAACCAAAGTAATGATTGATAGGGAT  
GGTTGGGGTGCTCGTATT CAGGGGCTAGCGGTGAAATGCGGTGATTCCCTGAAGACGAA  
CTAATGCGAAAGCATT CACCAAGGACATCTTCT  
>P036\_01  
AGCTCCAATAGCGTATATTAAC TTTGCTGCAGTTAAAAAGCTCGTAGTCAAATGTCTGAA  
GTCTGGAACGCGGGT CATCCGACTATCGGATCGAACTCGAATCGTTCCAGATTCTTTTTCT  
CTGAATAGTGCTTCTGTCCTTAATTGAATGGTTCGTACAAC TCAAGTCTTTTACCGTGAAC  
AAATGAAAGTGTTC AAAGCAAGCTTACAGTGTGCTTGAATCTTTTAGCATGGAATAATAA  
GATAAAACTCTGGTTTTGTTTTGTTGGCCATAAAACTAAAGTAATGATTGATAGGGATGG  
TTGGGGTGCTCGTATT CAGGGGCTAGCGGTGAAATGCGATGATTCCCTGAAGACGAACT  
AATGCGAAAGCATT CACCAAGGACATCTTCT  
>P037\_02  
AGCTCCAATAGCGTATATTAAC TTTGCTGCAGTTAAAAAGCTCGTAGTCAAATGTCTGAA  
ACTTGGAACGCGAGT CATCCGACTATCGGATCGAACTCGGCTCGTTCCAGTTCTTTTTCT  
CTGAATAGTGCTTCTGTCCTTAATTGAATGGTTCGTACAAC TCAAGTCTTTTACCGTGAAC  
AAATGAAAGTGTTC AAAGCAAGCTTACAGTGTGCTTGAATCTTTTAGCATGGAATAATAA  
GATAAAACTCTGGTTTTGTTTTGTTGGCCATAAAACCAAAGTAATGATTGATAGGGATGG  
TTGGGGTGCTCGTATT CAGGGGCTAGCGGTGAAATGCGATGATTCCCTGAAGACGAACT  
AATGCGAAAGCATT CACCAAGGACATCTTCT  
>P038\_01  
AGCTCCAATAGCGTATATTAAC TTTGCTGCAGTTAAAAAGCTCGTAGTCAAATTTCTGGT  
CTGNCAAACGCGAGCCGCCCTAAACGGGCTGTGTCTCGACATGTTTGCAGGCCATCCTTC  
TGGAGAATGCTTCTGCCCTTGATTGGGTGGTGTACTATTCAGATCTTTTACTGTGAGC  
AAATGAAAGTGTTC AAAGCAGGCAATGTTATGCTTGAATCTTTTAGCATGGAATAATAAG  
ATAAACTTTAGTTTTATTTTGTGGCCATAAAACNAAAGTAATGATTGAAAGGGATAGT  
TGGGGTGCTCGTATT CAGGGGCCAGCGGTGAAATGCAATGATCCCTGAAGACGAACTA  
ATGCGAAAGCATT CACCAAGGATATCTTCT  
>P039\_01  
AGCTTCAGTAGCGTATATTAAGTTGTTGCAGTTAAAAAGCTCGTAGTCAAATTTCTGGT  
TTGTCAAAC TCGAGCCACCCTAATAGGGTCGAGTCTCGACATGTTTGCAGACCATCATTC  
TGGAAGTGTCTTCTGCCCTTGATTGGGTGGTGTACAATTCAGATCTTTTACTGTGAGC  
AAATGAAAGTGTTC AAAGCAGGCAATGTCATGCTTGAATCTTTTAGCATGGAATAATAAA  
ATAGA ACTCGGGTTTTATTTTGTGGCCATAAACTTGAGTAATGATTGAAAGGGATAGT  
TGGGGTGCTCGTATT CAGGGGCCAGCGGTGAAATGCAATGATCCCTGAAGACGAACTA  
ATGCGAAAGCATT CACCAAGGATATTTCT  
>P040\_01  
AGCTCCAATAGCGTATATTAAC TTTGCTGCAGTTAAAAAGCTCGTAGTCAAATTTCTGGT  
TTGTCAAAC TCGAGCCACCCTAATAGGGTCGAGTCTCGACATGTTTGCAGACCATCATTC  
TGGAAGTGTCTTCTGCCCTTGATTGGGTGGTGTACAATTCAGATCTTTTACTGTGAGC  
AAATGAAAGTGTTC AAAGCAGGCAATGTCATGCTTGAATCTTTTAGCATGGAATAATAAA  
ATAGA ACTCGGGTTTTATTTTGTGGCCATAAACTTGAGTAATGATTGAAAGGGATAGT  
GGGGTGCTCGTATT CAGGGGCCAGCGGTGAAATCTTGGATTGCTGAAGACGAACTA  
TGCGAAAGCATT CACCAAGGATGCTTCT  
>P041\_01  
AGCTCCAATAGCGTATATTAAC TTTGCTGCAGTTAAAAAGCTCGTAGTCAAATTTCTGGT  
TTGTCAAAC TCGAGCCGCCCTAATGGGGCTGAGCCTCGATACGTTTGCAGACCATCATTC  
TGGAATAACTTCTGCCCTTGATTGGGTGGTGTATAATTCAGATCATTTACTGTGAGC  
AAATGAAAGTGTTC AAAGCAAGCAATGCTATGCTTGAATCTTTTAGCATGGAATAATAAT

ATAGAACTTAGGTTTTATTTTGTGGCCATAAACTTGAGTAATGATTGAAAGGGATAGT  
TGGGGGTGCTCGTATTCAGGGGCCAGCGGTGAAATGCAATGATCCTCTGAAGACGAACTA  
ATGCGAAAGCATTACCAAGGATATTTTCT

>P042\_01

AGCTCCAATAGCGTATATTAACCTTTGCTGCAGTTAAAAAGCTCGTAGTCTGAATTTCTGGT  
TTGTCAAACGCGAGCCGCCCTAATGGGGTTGTGCCTCGACATGTTTGCAGACCATCCTCC  
TGAAAAGTACTTCTGCCATTAGCTTGGTTGGTTGTACGATTCAGGTCATTTACTGTGAGC  
AAATGAGAGTGTTCAAAGCAGGCAATTGCTATGCTTGAATCTTTTAGCATGGAATAATAA  
TATAGAACTTGGGTTTTATATTGTTGGCCATAAACTTGAGTAATGATTGAAAGGGATAG  
TTGGGGGTGCTCGTATTCAGGGGCCAGCGGTGAAATGCAATGATCCTCTGAAGACGAACT  
AATGCGAAAGCATTACCAAGGATATTTTCT

>P043\_03

AGCTCCAATAGCGTATATTAACCTTTGCTGCAGTTAAAAAGCTCGTAGTCTAATTTCTGAC  
TTATCAAACCTCGAGCCGCCCTAATGGGGCTGTGCCTCGACATGTTTGTAGGTCATCCTTC  
TGAAAAGTGTCTTGCCTTGTATTGGGTTGGTTGCACGATTCAGATCATTACTGTGAGC  
AAATGAAAAGTGTTCAAAGCAGGCAATAGCTATGCTTGAATCTTTTAGCATGGAATAATAA  
TATAGAACTTAGGTTTTATTTTGTGGCCATAAACTTGAGTAATGATTGAAAGGGATAG  
TTGGGGGTGCTCGTATTCAGGGGCCAGCGGTGAAATGCAATGATCCTCTGAAGACGAACT  
AATGCGAAAGCATTACCAAGGATATTTTCT

>P044\_02

AGCTCCAATAGCGTATATTAACCTTTGCTGCAGTTAAAAAGCTCGTAGTCTAATTTCTGGC  
TTGTCAAACCTCGAGCCGCCCTAATGGGGCTGAGCCTCGACATGTTTGCAGGTCATCCTTC  
TGAAAAGCACTTCTGCCCTTGTATTGGGTTGGTTGTGCAATTCAGATCATTACTGTGAGC  
AAATGAAAAGTGTTCAAAGCAGGCAATTGCTATGCTTGAATCTTTTAGCATGGAATAATAA  
TATAGAACTTAGGTTTTATTTTGTGGCCATAAACTTGAGTAATGATTGAAAGGGATAG  
TTGGGGGTGCTCGTATTCAGGGGCCAGCGGTGAAATGCAATGATCCTCTGAAGACGAACT  
AATGCGAAAGCATTACCAAGGATATTTTCT

>P045\_01

AGCTCCAATAGCGTATATTAACCTTTGCTGCAGTTAAAAAGCTCGTAGTCTAATTTCTGAC  
TTGTCAAACCTCGAGCCGCCCTAATGGGGCTGAGCCTCGATATGTTTGCAGGTCATCCTTC  
TGAAAAGCACTTCTGCCCTTGTATTGGGTTGGTTGTGCAATTCAGATCATTACTGTGAGC  
AAATGAAAAGTGTTCAAAGCAGGCAATAGCTATGCTTGAATCTTTTAGCATGGAATAATAA  
AATAGAACTTAGGTTTTATCTTGTGGCCATAAACTTGAGTAATGATTGAAAGGGATAG  
TTGGGGGTGCTCGTATTCAGGGGCCAGCGGTGAAATGCAATGATCCTCTGAAGACGAACT  
AATGCGAAAGCATTACCAAGGATATTTTCT

>P046\_03

AGCTCCAATAGCGTATATTAACCTTTGCTGCAGTTAAAAAGCTCGTAGTCTAATTTCTGAC  
TTGACAAACCTCGAGCCGCCCTAATGGGGCTGAGCCTCGACATGTTTGCAGGTCATCATTCT  
TGAAAAGCACTTCTGCCCTTAGTTGGGTTGTTGTGCAATTCAGATCATTACTGTGAGC  
AAATGAAAAGTGTTCAAAGCAGGCAATCGCTATGCTTGAATCTTTTAGCATGGAATAATAA  
AATAGAACTTAGGTTTTATTTTGTGGCCATAAACTTGAGTAATGATTGAAAGGGATAG  
TTGGGGGTGCTCGTATTCAGGGGCCAGCGGTGAAATGCAATGATCCTCTGAAGACGAACT  
AATGCGAAAGCATTACCAAGGATATTTTCT

>P047\_02

AGCTCCAATAGCGTATATTAACATTGCTGCAGTTAAAAAGCTCGTAGTCTGAATTTCTGAC  
TTTGCAAACCTCGGTCCATCCGATTGGATGCGCTCCGAAYGTTTGTGGGTCATCCTTCTGG  
AGAGTGCTTCTGCCCTTARTGGGTTGGTTGTACGATTCAGATCATTACTGTGAGCAAA  
TGAGAGTGTTCAAAGCAGGCTTTAAGCTATGCTCGAATCTTTTAGCATGGAATAATAAGA  
TAGAACTTCGGTTTTATTTTGTGGCCATAAAACCAAAGTAATGATTGAAAGGGATAGTT  
GGGGGTGCTCGTATTCAGGGGCTAGCGGTGAAATGCAATGATCCTCTGAAGACGAACTAA  
TGCGAAAAGCATTACCAAGGATATCTTCT

>P048\_01

AGCTCCAATAGCGTATATTAACATTGCTGCAGTTAAAAAGCTCGTAGTCTGAATTTCTGGC  
TTGTCAAACGCGATCCATCCTATTGGATGTGTTTCGATAGTTTGCAGGTCATCCTTCTGG  
AAAGTGCTTCTGCCCTTGTATTGGGTTGGTTGTACGATTCAGATCATTACTGTGAGCAAA  
TGAGAGTGTTCAAAGCAGGCTTTAAGCTATGCTCGAATCTTTTAGCATGGAATAATAAGA  
TAGAACTTCGGTTTTATTTTGTGGCCATAAAACCAAAGTAATGATTGAAAGGGATAGTTGG  
GGGTGCTCGTATTCAGGGGCTAGCGGTGAAATGCAATGATCCTCTGAAGACGAACTAATG  
CGAAAAGCATTACCAAGGATATCTTCT

>P049\_01

AGCTCCAATAGCGTATATTAACATTGCTGCAGTTAAAAAGCTCGTAGTCTGAATTTCTGAC  
TTGTTAAACGCGATCCATGCAATTGCATGTGATTTCGATTAGGTTTCCGGGTCATCCTTCT  
GGAGAGTGCTTCTGCCCTTAGTTGGGTTGGTTGTACGATTCAGATCCTTTACTGTGAG  
CAAATGAGAGTGTTCAAAGCAGGCTTTAAGTCATGCTCGAATCTTTTAGCATGGAATAAT

AATATAGAACTTCGGTTTTATTTTGTGGCCAATAAAACCAAAGTAATGATTGAAAGGGA  
TAGTTGGGGGTGCTCGTATTCAGGGGCTAGCGGTGAAATGCAATGATTCCCTGAAGACGA  
ACTAATGCGAAAGCATTACCAAGGATATCTTCT  
>P050\_01  
AGCTCCAATAGCGTATACTAATGTTGTTGCAGTTAGAAAGCTCGTAGTCGAATTTCTGAC  
TTGTTAAACGCGATCCATGCAATTGCATGTGATTTCGATAGTTTCCGGGTCATCCTTCTGG  
AGAGTGCTTCTGCCCTTAGTTGGGTGGTGTGACGATTAGATCTTTTACTGTGAGCAAA  
TGAGAGTGTTCAAAGCAGGCTTTAAGTCATGCTCGAATCTTTTAGCATGGAATAATACGA  
TAGAACTTCGGTTTTATTTTGTGGCCATAAAACCAAAGTAATGATTGAAAGGGATAGTT  
GGGGTGCTCGTATTCAGGGGCTAGCGGTGAAATGCAATGATTCCCTGAAGACGAACTAA  
TGCGAAAGCATTACCAAGGATATCTTCT  
>P051\_01  
AGCTCCAATAGCGTATATTAACATTGCTGCAGTTAAAAAGCTCGTAGTCGAATTTCTGGT  
ATGTCAGCTGGATGCTCTCTATGAGAGTATCCTACGTTTTCGGTGCATCATTCTGAAA  
GTACTTCTGCTTAACTGGGTGGTGTGCGGTTAGATCATTACTGTGAGCAAAATGAG  
AGTGTTCAAAGCAGGCTTAATTGTATGCTTGAATCCTTTAGCATGGAATAATAAGATAAA  
ACTTCGGTTTTCTTGTGGCCATAAAACCAAAGTAATGATTGAAAGGGATAGTTGGGGGT  
GCTCGTATTCAGGGGCTAGCGGTGAAATGCAATGATTCCCTGAAGACGAACTAATGCGAA  
AGCATTACCAAGGATATCTTCT  
>P052\_06  
AGCTCCAATAGCGTATATTAACCTTTGCTGCAGTTAAAAAGCTCGTAGTCGAATTTCTGAT  
CTGCCAGACGCGAGTGCTCTCTGTGAGACGCACATCGTAATGCTGCGGGTCATCCTTCT  
GGAAAGTACTTCCGCCCTTGATTGGGTAGTTGTACAATTCAGATCATTACTGTGAGCA  
AATGAGAGTGTTCAAAGCAGGCTTTATAGTATGCTTGAATCTTTTAGCATGGAATAATA  
GATAGAACTTCGGTTTTATTCTGTTGGCCATAAGACCAAAGTAATGATTGAAAGGGATAG  
TTGGGGGTGCTCGTATTCAGGGGCTAGCGGTGAAATGCAATGATTCCCTGAAGACGAACT  
AATGCGAAAGCATTACCAAGGATATCTTCT  
>P053\_01  
AGCTCCAATAGCGTATATTAACCTTTGCTGCAGTTAAAAAGCTCGTAGTCGAATTTCTGGT  
TTGTCAAACGCGATTGCTCCAAACGGACGCATATCGATTTGTTTGGCAACCATCATTCTG  
GAAAGTACTTCTCCCTTGATTGGGTATGTTGTGCAATTCAGATCATTACTGTGAGCAA  
ATGAGAGTGTTCAAAGCAGGCTTTATAGTATGCTTGAATCTTTTAGCATGGAATAATAAG  
ATAAACTTTGGTTTTATTTTGTGGCCATAAAACCAAAGTAATGATTGAAAGGGATAGT  
TGGGGGTGCTCGTATTCAGGGGCTAGCGGTGAAATGCAATGATTCCCTGAAGACGAACTA  
ATGCGAAAGCATTACCAAGGATATCTTCT  
>P054\_03  
AGCTCCAATAGCGTATATTAACCTTTGCTGCAGTTAAAAAGCTCGTAGTCGAATTTCTGAT  
CTGTCAACCTCGAATACTCTCAAGTAGACGTATATCGAATTGGTTGCGGATCATCTTCT  
GGAAAGTGTTCGGTCTCTTGATTGAGCATGGGCGCACAAATTCAGATCATTACTGTGAGC  
AAATGAGAGTGTTCAAAGCAGGCTTTATAGTATGCTTGAATCTTTTAGCATGGAATAATA  
AGATAAACTTTAGTTTTATTCTGTTGGCCATAAAACCAAAGTAATGATTGAAAGGGATA  
GTTGGGGGTGCTCGTATTCAGGGGCTAGCGGTGAAATGCTCTGATTCCCTGAAGACGAACT  
TAATGCGAAAGCATTACCAAGGATATCTTCT  
>P055\_01  
AGCTCCAATAGCGTATATTAAGTTGTTGCAGTTAAAAAGCTCGTAGTCGAATATCTGGT  
TTGTCAAACGCGAGTACTCTCAAAGAGACGTACCTCGAATTGTTTGGGACCATCTTCT  
GGAAGTAAATGCTGACTTGAATGCTCGGCAGTGCAATTCAGATCCTTTACTGTGAGCAA  
ATGAGAGTGTTCAAAGCAGGCTTTATAGTATGCTTGAATCTTTTAGCATGGAATAATAAG  
ATATAACTTCGGTTTTATTTTGTGGCCATAAAACCAAAGTAATGATTGAAAGGGATAGT  
TGGGGGTGCTCGTACTTAGAGGCTAGCGGTGAAATGCAATGATTCTCTGAAGACGAACTA  
ATGCGAAAGCATTACCAAGGATATCTTCT  
>P056\_01  
AGCTCCAATAGCGTATATTAACCTTTGCTGCAGTTAAAAAGCTCGTAGTCGAATTTCTGGT  
CCTTCAAACGCGAGCACTCTCCATGAGACGTGCCTCGAATTGTTTGGGATCATCATTCT  
GGAAAGTGGTGTGCTGCCCTTGATTGGGTATGTAGTACAATTCAGATCATTACTGTGAGCA  
AATGAGAGTGTTCACGCAAGCTTTTAGTATGCTTGAATCTTTTAGCATGGAATAATAA  
GATAAACTTCGGTTTTATTTTGTGGCCATAAAACCAAAGTAATGATTGAAAGGGATAG  
TTGGGGGTGCTCGTATTCAGAGGCTAGCGGTGAAATGCGATGATTCTCTGAAGACGGACC  
AATGCGAAAGCATTACCAAGGATATCTTCT  
>P057\_01  
AGCTCCAATAGCGTATATTAACCTTTGCTGCAGTTAAAAAGCTCGTAGTCGAATTTCTGGT  
CCGTCAAACGCGAGCACTCTCTATGAGACGTGCCTCGACTTGTGTTGGGACCATCTTCT  
GGAAAGTATTCAGCCCTTGATTGGGTGTGTCATGCGATTAGATCATTACTGTGAGCA  
AATGGGAGTGTTCAAAGCAAGCTATATAGTATGCTTGAACCTTTTAGCATGGAATAATAA



GATAGAACTTCGGTCTATTTTGTGGCCATAAGACCAAAGTAATGATTGAAAGGGATAG  
TTGGGGGTGCTCGTATTTCAGAGGCTAGCGGTGAAATGCAATGATTCTCTGAAGACGAACT  
AATGCGAAAGCATTACCAAGGATATCTTCT

>P058\_01

AGCTCCAATAGCGTATATTAACCTTTGCTGCAGTTAAAAAGCTCGTAGTCGAATTTCTGGT  
ATGTTAAAAACGAGTGTCTCAATGGAGACGCATCTCGGAACGTTAACGACCATCTTT  
CTGGAGCGTGTCTCAATCCTTGATTGGATGTGTTGTACAATTCAGATCATTACTGTGAG  
CAAATGAGAGTGTTCAAAGCAGGCTATATGTATGCTTGAATCTTTTAGCATGGAATAATA  
AGATAAACTTTAGTTTTATTCTGTGGCCATAAAACCAAAGTAATGATTGAAAGGGATA  
GTTGGGGGTGCTCGTATTTCAGGGGTAGCGGTGAAATGCAATGATTCCCTGAAGACGAACT  
TAATGCGAAAGCATTACCAAGGATATCTTCT

>P059\_11

AGCTCCAATAGCGTATATTAACCTTTGCTGCAGTTAAAAAGCTCGTAGTCGAATTTCTGGT  
TTGTCAAACGCGAGTACTCTCAAGGAGATGTACCTCGAACTGTTTGGCGACCATCCATCT  
AGTGTGTGCTCCACTCTTGGTTGAGTTGGTTGTGCAAAAAATAGATCATTACTGTGAGC  
AAATGAGAGTGTTCAAAGCAAGTATTACTAGCTTGAATCTTTTAGCATGGAATAATAAAA  
TATAACTTCGGTTTTATTTTGTGGCCATAATACCAAAGTAATAATTGAAAGGGATAGTT  
GGGGGTGCTCGTATTTCAGGGGTAGCGGTGAAATGCAATGATTCCCTGAAGACGAACTAA  
TGCGAAAGCATTACCAAGGATATCTTCT

>P060\_01

AGCTCCAATAGCGTATATTAACCTTTGCTGCAGTTAAAAAGCTCGTAGTCGAATTTCTGGT  
TTGTCAAACGCGAGTACTCTCAAGGAGATGTACCTCGAACTGTTTGGCGACCATCCATCT  
AGTGTGTGCTCCACTCTTGGATTGATTGGTTGCGCTATTCGGCTCTTTACTGTGAACAA  
ATGAAAGTGTTCAAAGCAAGCTGATTTGAAGCTTGAATCTTTTAGCATGGAATAATAAGA  
TAAGACTCCGGTTTTGTTTTATTGGCCATAAACTGAAGTAATGATTGAAAGGGATAGTT  
GGGGGTGCTCGTATTTCAGGGGTAGCGGTGAAATGCGATGATTCCCTGAAGACGAACTAA  
TGCGAAAGCATTACCAAGGATATCTTCT

>P061\_01

AGCTCCAATAGCGTATATTAACCTTTGCTGCAGTTAAAAAGCTCGTAGTCGAATTTCTGGT  
CTGTCAAACGCGAGTACTCTCAATGAGACGTATCTCGGATTGTTTGGCGGCCATCCTTCT  
GGAAAGTGCTTCTGCGCTTGATTGTGTAGTTGTACAATTCAGATCATTACTGTGAGCA  
AATGAGAGTGTTCAAAGCAGGCTAACGTATGCTTGAATCTTTTAGCATGGAATAATAAG  
ATAAACTTAGGTTTTGTTTTGTTGGCCATAAAACCAAAGTAATGATTGATAGGGATAGT  
TGGGGGTGCTCGTATTTCAGGGGTAGCGGTGAAATGCAATGATTCCCTGAAGACGAACTAA  
ATGCGAAAGCATTACCAAGGATATCTTCT

>P062\_02

AGCTCCAATAGCGTATATTAACCTTTGCTGCAGTTAAAAAGCTCGTAGTCGAATTTCTGGT  
CTGTCAAACGCGAGTACTCTCAAAGAGACGTATCTCGGATTGTTTGGCGGCCATCCTTCT  
GGAAAGTGCTTCTACTCTTGATTGAGTCGGTTGTACAATTCAGATCATTACTGTGAGCA  
AATGAGAGTGTTCAAAGCAGGCTAACGTATGCTTGAATCTTTTAGCATGGAATAATAAG  
ATAAACTTAGGTTTTGTTTTGTTGGCCATAAAACCAAAGTAATGATTGAAAGGGATAGT  
TGGGGGTGCTCGTATTTCAGGGGTAGCGGTGAAATGCAATGATTCCCTGAAGACGAACTAA  
ATGCGAAAGCATTACCAAGGATATCTTCT

>P063\_01

AGCTCCAATAGCGTATATTAACCTTTGCTGCAGTTAAAAAGCTCGTAGTCGAATTTCTGGT  
CTGTCAAACGCGAGTACTCTCAATGAGACGTATCTCGGATTGTTTGGCGNCCATCCTTCT  
GGAAAGTAGATTCCACTCTTGATTGGGTGCGATTCTACAATTCAGATCATTACTGTGAGC  
AAATGAGAGTGTTCAAAGCAGGCTAACGTATGCTTGAATCTTTTAGCATGGAATAATAAA  
GATAAACTTAGGTTTTGTTTTGTTGGTCATAAAACCAAAGTAATGATTGAAAGGGATAG  
TTGGGGGTGCTCGTATTTCAGGGGTAGCGGTGAAATGCAATGATTCCCTGAAGACGAACT  
AATGCGAAAGCATTACCAAGGATATCTTCT

>P064\_01

AGCTCCAATAGCGTATACTAACGTTGCTGCAGTTAAAAAGCTCGTAGTCGAACGTGTGGC  
CTTTCTTTCCCTTGGTTGGTTTGAGAGAGATCGAAAACCTCCAAGGATAAGAGCAAACGC  
GAGCCGACACTTTTGTGGTTCCATTAACCTGGTTCCACAAGTGGTTGGCGTCGATTTTT  
GTTTGGGGTGCATCAATTTGAACGCGGTGTCCGCCCTTGTAGTGGGAAGGAGACGCGGT  
GAAATCTTTACTGTGAGTAAATGAGAGTGTCCAAGCAGGCTCATATGTTGCTCGAATC  
ATTTAGCATGGAATAATAAGATAGACTTTGGTTCTATTTTGTGGCCTTAGAACAAAAG  
TAATGATTGAAAGGGATAGTTGGGGGTGCTCATATTCAGGGGTAGCGGTGAAATGCGAT  
GATCCTCGAAGATGAACTAATGCGAAAGCATTACCAAGGATATCTTCT

>P065\_02

AGCTCCAATAGCGTATATTAACCTTTGCTGCAGTTAAAAAGCTCGTAGTCGGTTCTCTGGT  
CTAAAATCCCGAACCATCTCTTCGTGAGTTGCGCGTCGTAAGATTTAGATCATCCTTCT  
GGATTGTGTTCTTCCATTGAATTGGTTAGTTGCTACATCCAGATCTTTACTGTGAGTA

AATGAGAGTGTTCAAAGCAAGCTCTATATTGCTCGAATCTTAAAGCATGGAATAATGATA  
TAGAACCTTATTGTTTTATTTTGTGGCCCTAGAACTAAAGTAATGATTGATAGGGATAG  
TTGGGGGTGCTCATATTCAGGGGGTAGCGGTGAAATGCGATGATCCTCTGAAGATGACCT  
AAAGCGAAAGCATTACCAAGGATATCTTCT

>P066\_01

AGCTCCAATAGCGTATATTAGCTTTGCTGCAGTTAAAAAGCTCGTAGTCAATTTCTGAT  
TTTTAAAGCTCACACCTTCCTTATACAGGTTGCGTTGCTGTTGCTATGAAATCATCCTTC  
TGGGTAGGTCTTCTTCCATTGAATTGGTAAGTTGGCTCCTCCAGATCTTTTACTATGAGT  
AAATGAGAGTGTCAAAGCAAGCTCACTTTGCTCGAATCATAAAGCATGGAATAATGATA  
TAGAACTTTTTGTGTTTTATTTGCTTGGCCTAAACTAAAGTAATGATTGACAGGGATAGT  
TGGGGGTGCTCATATTCAGGGGGTAGCGGTGAAATGCGATGATCCTCTGAAGATGACCTA  
AAGCGAAAGCATTACCAAGGATATCTTCT

>P067\_02

AGCTCCAATAGCGTATACTAACACTGCTGCAGTTAAAAAGCTCGTAGTCAATTTGTGTT  
CTACTCGACTCAAGCCGCCTTTAATCGGGTCGGTATTGACATGTCAGTAGTTCATTAGCC  
CGTGGGAGTGCATCTGTCCTTGATTGGGTGGTTGTACAATCCGGGTCTTTACTGTGAGC  
AAATGAGCGTGTCAAAGCAAGCTCTTATGCTTGAATTATTTAGCATGGAATAATGATAT  
AAAACCTGGNTTTTTATTTTGTGGCCTGGAAATCCAAGTAATGATTGAAAGGGATAGTTG  
GGGGTGTCTCATATTCAGGGGGTAGCGGTGAAATGCGATGATCCTCTGGAGATGAACTAAT  
GCGAAAGCATTACCAAGGATATTTTCT

>P068\_01

AGCTCCAATAGCGTATATTAATGTTGCTGCAGTTAAAAAGCTCGTAGTCGATTATGTAGC  
GTCACCTTGCTGATCGGGCCCTAGTATAAGGCTGTGTATCGTGCAGTGGGCTATCTTC  
CAGGGAAGATTACTGCCCTTGATTGGGTGGTGTATGATCTTGGAGTTTTTACTGTG  
AGTAAATGAGAGTGCTTAATGCAGGCTCACTGAATGCTTGAATCTTTTAGCATGGAATAA  
TAAGATAGAACCTGTGTTTWTATTTGTTGGCTTTTTGAACTCAAGTAATGATCGATAGGG  
ATAGTTGGGGGTGCTCATATTCATGGGGTAGCGGTGAAATGCGATGATCCTGTGAAGATG  
AACTAATGCGAAAGCATTACCAAGGATATCTTCT

>P069\_01

AGCTCCAATAGTGTATACTAATGTTGCTGCAGTTAAAAAGCTCGTAGTCGACTATTTGTG  
TTATGGCAACAGCACTTCTTAACCTAAGATGATGTTTGAAGCCGTGACTCTTCATTTTCAG  
AAAATGTCTCTGCCCTTGATTGGGTGGTTTCAATCTGAAGCGTTTACTGTGAGCAAA  
TGGGAGTGTAAAAGCAGGCCAAAAGCCTGTACCGTTTTAGCATGGAATAATATGATATAA  
CTCTGTTTTTTTCTAGTTGGCTTATTAATTCGAGTAATGATCTATAGGGATAAATGGGGG  
TGCTCATATTCATGGGGTAGCGGTGAAATGCATTGATCCTCTGAAGATGAACTAATGCGA  
AAGCATTACCAAGGGTATTTTCA

>P070\_01

AGCTCCAATAGTGTATACTAATGTTGCTGCAGTTAAAAAGCTCGTAGTCGACTATGTTTG  
TTATGGCAACAGCACTTCTTAACCTAAGATGATGTTTGAAGCCGTGACTCTTCATTTTCAG  
AAAATGTCTCTGCCCTTGATTGGGTGGTTTCAATCTGAAGCGTTTACTGTGAGCAAA  
TGGGAGTGTAAAAGCAGGCCAAAAGCCTGTACCGTTTTAGCATGGAATAATATGATATAA  
CTCTGTTTTTTTCTAGTTGGCTTATTAATTCGAGTAATGATCTATAGGGATAAATGGGGG  
GTGCTCATATTCATGGGGTAGCGGTGAAATGCATTGATCCTCTGAAGATGAACTAATGCG  
AAAGCATTACCAAGGGTATTTTCA

>P071\_02

AGCTCCAATAGTGTATACTAATGTTGCTGCAGTTAAAAAGCTCGTAGTCGAAATTGTGAG  
TAGTGTAACTCAACTGGTACTTTAATGAAGTCCAAATGTTGATTTGTTAGCTACTCATCA  
TTCTGGTTCTAACTTCTGCCCTTGATTGGGTGGTTGTTTACTAGACTAGAATTTTACCCTG  
AGAAAATGGGAGTGTAAAAGCAGGCCAAAAGCAAATGCACGAACCGTTTACTGATGGAATAA  
TGATATATAACTTCTGTTGTATTTGCTTGGCTCATATGAGAGAAGTAATGATTGAAAGGG  
ATAATGGGGGTGCTCATATTTAGAGGGTAGCGGTGAAATGCATTGATCCTCTGAAGATG  
AACTAATGCGAAAGCATTACCAAGGATATCTTCT

>P072\_01

AGCTCCAATAGTGTATACTAATGTTGCTGCAGTTAAAAAGCTCGTAGTCGGATTTGTGAA  
CAAATGAATCAAACCTTTGCTTTTTATGAAGCAATTGTTTTGTTAATTCATATTTTCATTA  
TTATAGAAAAATTTTCTGCCCTTGATTGGGTGGTTGTATAATCTATAGCGTTTACTGTG  
AGAAAATGGGAGTGTCAAAGCAGGCTTTATAGTATGCTTGAATCTTTTAGCATGGAATA  
ATAAGATAGAATTCGGTTTTATTTCTGTTGGCCATAAGACCAAAGTAATGATTGAAAGGG  
ATAGTTGGGGGTGCTCGTATTCAAAGGCTAGCGGTGAAATGCAATGATTCTTTGAAGACG  
AACTAATGCGAAAGCATTACCAAGGATATTTTCT

>P073\_03

AGCTCCAATAGTGTATACTAATGTTGCTGCAGTTAAAAAGCTCGTAGTCGGATTTGTGAA  
CAAATGAATCAAACCTTTGCTTTTTATGAAGCAATTGTTTTGTTAATTCATATTTTCATTA  
TTATAGAAAAATTTTCTGCCCTTGATTGGGTGGTTGTATAATCTATAGCGTTTACTGTG

GAGAAAATGGGAGTGTTCAAAGCAAGCTTTATGCATGCCGGAACCGTTTAGCATGGAATA  
ATGATATATAACTTCTGTTATATTTTCGTTGGCTTATGTAATGAAGTAATGATTGAAAGG  
GATAGTTGTGGGTGCTGATATTCAGTCGGTAGCGGTGAAATGCTCTGATCCTCTGAAGAT  
GAACTAATGCGAAAGCATTACCAAGGATATTTTCT

>P074\_02

AGCTCCAATAGCGTATACTTACGTTGCTGCAGTTAAAAAGCTCGTAGTCAAATTTCTGAC  
TTGTCGGTGTGCAACCATTCCCTAACAGGGTGCCTCGAAAATGCCGCGGGTCATCCTT  
TTGGCCCGTACTTCTACTATTAATTTAGTGGTGTGCGTCCAGATCGTTTACTGTGAGAA  
AATGGGAGTGTTCAAAGCAAGCTTTCACGCCCGAACCGTTTAGCATGGAATAATAAGATA  
GAACTTCTGTTTTATTTTGTGACTTCTAAAGCGGAAGTAATGATTGATAGGGATAGTTG  
GGGGTGTCTATATTCAGTGGGTAGCGGTGAAATGCGATAATCCACTGAAGATGAACTAAT  
GCGAAAGCATTACCAAGGATATCTTCT

>P075\_04

AGCTCCAATAGCGTATATTAATGTTGCTGCAGTTAAAAAGCTCGTAGTCGAAATTTCTGGC  
GTTTCAAACCTAGCCATTCCCTGAAAAAGGGTGCCTTAGACTTGTGTTGAATGCCATCC  
TTCTGGAGAGTGCATCGGCCCTTGATTGGGTGAGTTGCAGGATCCAGATCGTTTACTGTG  
AGCAAATGAGAGTGTTTAAAGCAGGCTACTAAATGCCTGAATCGTTTAGCATGGAATAAT  
AAGATAGAACTTTGGTTTTATTTTGTGGCTTTTAGAACTAAAGTAATGATCGAAAGGGA  
TAGTTGGGGGTGCTCATATTCAGCGGGTAGCGGTGAAATGCGATGATCCGCTGAAGATGA  
ACTAATGCGAAAGCATTACCAAGGATATCTTCT

>P076\_09

AGCTCCAATAGCGTATATTAATGTTGCTGCAGTTAAAAAGCTCGTAGTCGAACTTCTGAC  
TTGTCAAACCTAGCCATTCCCTTAAACAAGGGTGCCTCAGAACTGTTTGGCGGTATCC  
TTCTGGAGCGTGTCTTGCCTTAAATGGGTGTGTTGTACAAATCCAGATCCTTTACTGTG  
AGCAAATGAGAGTGTTCAAAGCAGGCTTATGCCATGCCTGAATCGTTTAGCATGGAATAA  
TAAGATAGAACTTCGGTTTTATTTTGTGGCTTTTAAAACCAAAGTAATGATCGATAGGG  
ATAGTTGGGGGTGCTCATATTCAGCGGGTAGCGGTGAAATGCGATGATCCGCTGAAGATG  
AACTAATGCGAAAGCATTACCAAGGATATCTTCT

>P077\_02

AGCTCCAATAGCGTATACTAATGTTGCTGCAGTTAAAAAGCTCGTAGTCGAAATTTCTGAC  
CTGTCAAAGCTTAGCCATTCCCTTGACAAAAGGGTGCCTTAGGACCGCTTGGCGGTATCC  
TTCTGGAGAGTGTCTTGCCTTGAATGGGTGTGTTGTACGATCCGGATCCTTTACTGTG  
AGCAAATGAGAGTGTTCAAAGCAGGCTTCTATTATGCCTGAATCGTTTAGCATGGAATAA  
TAAGATAGAACTTTGGTTTTATTTTGTGGCTTTTAAAACCAAAGTAATGATCGAAAGGG  
ATAGTTGGGGGTGCTCATATTCAGCGGGTAGCGGTGAAATGCGATGATCCGCTGAAGATG  
AACTAATGCGAAAGCATTACCAAGGATATCTTCT

>P078\_02

AGCTCCAATAGCGTATATTAATGTTGCTGCAGTTAAAAAGCTCGTAGTCGAAATTTCTGGT  
CTGTCAAAGCTTAGCCATTCCCTGAAAAAGGGTGCCTTAGAACCGCTTGGCGGGCCATCA  
TTTTGGAGAGTGTCTTGCCTTGAATGGGTGTGTTGTACGATCCATTTCTTTTACTGTG  
AGCAAATGAGAGTGTTCAAAGCAGGCTTTTAGACATGCCTGAATCGTTTAGCATGGAATAA  
ATAAGATAGAACTTCGGTTTTATTTTGTGGCTTTTAAAACCAAAGTAATGATCGAATAGG  
GATAGTTGGGGGTGCTCATATTCAGCGGGTAGCGGTGAAATGCGATGATCCGCTGAAGATG  
GAACTAATGCGAAAGCATTACCAAGGATATCTTCT

>P079\_08

AGCTCCAATAGCGTATATTAATGTTGCTGCAGTTAAAAAGCTCGTAGTCGAAATTTCTGAC  
CTTTCCGACTTAGCCATTCCCTCGACAGAGGGTGCCTTAGATTTGTCTGTGGGTATCC  
TTCTGGAGAGTGTCTTCCGCCCTTGAATGGGTGTGTTGTGCGATCCAGGTCTTTTACTGTG  
AGCAAATGAGAGTGTTCAAAGCAGGCTTTATGCATGCCTGAATCGTTTAGCATGGAATAA  
TAAGATAGAACTTCGGTTTTATTTTGTGGCTTTTAAAACCAAAGTAATGATCGAAAGGG  
ATAGTTGGGGGTGCTCATATTCAGCGGGTAGCGGTGAAATGCGATGATCCGCTGAAGATG  
AACTAATGCGAAAGCATTACCAAGGATATCTTCT

>P080\_01

AGCTCCAATAGCGTATATTAATGTTGCTGCAGTTAAAAAGCTCGTAGTCGAAATTTCTGAT  
CCATCAAACCTTAGCCATTCCCTTATAAAGGGTGCCTTAGGATGTTTGTGGATCATCTT  
TCTGGAAAGTATATCCGCCCTTGAATGGGTGTGTTGTATAATCTAGATCGTTTACTGTGA  
GCAAATGAGAGTGTTCAAAGCAGGCTTTATGTCATGCCTGAATCGTTTAGCATGGAATAA  
TAATATAGAACTTCGGTTTTATTTTGTGGCTTATATAACCAAAGTAATGATCCAAAGGG  
ATAGTTGGGGGTGCTCATATTCAGCGGGTAGCGGTGAAATGCGATGATCCGTTGAAGATG  
AACTAATGCGAAAGCATTACCAAGGATATCTTCT

>P081\_01

AGCTCCAATAGCGTATATTAATGTTGCTGCAGTTAAAAAGCTCGTAGTCGAAATTTGTGAT  
CTGTCAAACCTTAGCCATTCCCTTGTCAAAGGGTGGTCCTAGGTGTGTTTGTGGGTATCT  
TTCTGTGATATTTTCTGCCCTTGAATGGGTGTGTTGTATGATACAGATCTTTTACTGTG

AGCAAATGAGAGTGTTCAAAGCAGGCTTAATTGCCTGAATCGTTAGCATGGAATAATGA  
GATAGAACGTTGGTTTTATTTTGTGGCTTCTAGAACCAAAGTAATGATTGAAAGGGATA  
GTTGGGGGTGCTCATATTCAGCGGGAAAGTGGTGAATACGTTGATCCGTTGAAGATGAAC  
TAATGCGAAAAGCATTACCAAGGATATCTTCT

>P082\_04

AGCTCCAATAGCGTATATTAATGTTGCTGCAGTTAAAAAGCTCGTAGTCGAACTTCTGAT  
CTGTCAAACCTCTAGCCATTCCCTTGACAAAGGGTGCGCCTAGACTGTTTGCGGGTCAATCC  
TTCTGGAGAGTGCTTCTGCCCTTGATTGGGTGTGTTGTACGATCCAGATCTTTTACTGTG  
AGCAAATGAGAGTGTTCAAAGCAGGCTCTATGTCATGCCTGAATCGTTTAGCATGGAATA  
ATAAGATAGAACTTCGGTTTTATTTTGTGGCTTCTAAAACCAAAGTAATGATCCAAAGG  
GATAGTTGGGGGTGCTCATATTCAGCGGGTAGCGGTGAAATGCGATGATCCGCTGAAGAT  
GAACTAATGCGAAAAGCATTACCAAGGATATCTTCT

>P083\_01

AGCTCCAATAGCGTATATTAATGTTGCTGCAGTTAAAAAGCTCGTAGTCGAAATATCTGAC  
CTGTCAAACCTCTAGCCATTCCCTTGACAAAGGGTGCGCCTAGACTGTTTGCGGGTCAATCC  
TTCTGGAGAGTGCTTCCGCCCTTGATTGGGTGTGTTGCGCGATGCAGATCCTTTACTGTG  
AGCAAATGAGAGTGTTCAAAGCAGGCTCTATGTCATGCCTGAATCGTTTAGCATGGAATA  
ATAAGATAGAACTTAGGTTTTATTTTGTGGCTTCTAAAACCAAAGTAATGATCCAAAGG  
GATAGTTGGGGGTGCTCATATTCAGCGGGTAGCGGTGAAATGCGATGATCCGCTGAAGAT  
GAACTAATGCGAAAAGCATTACCAAGGATATCTTCT

>P084\_03

AGCTCCAATAGCGTATATTAATGTTGCTGCAGTTAAAAAGCTCGTAGTCGAAATTTCTGAC  
CTGTCAAACCTCTAGCCATTCCCTTRWCAAAGGGTGCGCCTAGACTGTTTGTGGGTCAATCC  
TTCTGGAGAGTGCTTCTGCCCTTGATTGGGTGTGTTGTACGATCCAGATCGTTTACTGTG  
AGCAAATGAGAGTGTTCAAAGCAGGCTTATGTCATGCCTGAATCGTTTAGCATGGAATA  
ATAAGATAGAACTTCGGTTTTATTTTGTGGCTTCTAAAACCAAAGTAATGATCCAAAGG  
GATAGTTGGGGGTGCTCATATTCAGCGGGTAGCGGTGAAATGCGATGATCCGYTGAAGAT  
GAACTAATGCGAAAAGCATTACCAAGGATATCTTCT

>P085\_04

AGCTCCAATAGCGTATATTAATGTTGCTGCAGTTAAAAAGCTCGTAGTCGAAATTTCTGAT  
CTGTCAAACCTCTAGCCATTCCCTTATCTAAGGGTGCGCCTAGACTGTTTGCGGGTCAATCC  
TTCTGGAGAGTGCTTCTGCCCTTGATTGGGTGTGTTGTACGATCCAGATCTTTTACTGTG  
AGCAAATGAGAGTGTTCAAAGCAGGCTATATGTCATGCCTGAATCGTTTAGCATGGAATA  
ATAAGATAGAACTTCGGTTTTATTTTGTGGCTTCTAAAACCAAAGTAATGATCCAAAGG  
GATAGTTGGGGGTGCTCATATTCAGCGGGTAGCGGTGAAATGCGATGATCCGCTGAAGAT  
GAACTAATGCGAAAAGCATTACCAAGGATATCTTCT

>P086\_01

AGCTCCAATAGCGTATACTAATGTTGCTGCAGTTAAAAAGCTCGTAGTCGAAATTTCTGAC  
CTCTCAGACTCGAACTGCATCTATAAGTTGCGTGCTTCAAGTCTGTCCGGTCATACTTCT  
GGAGAGTGCTTCTGCCCTTGATTGGGTGGTGTACGACTCAGATCATTTACTGTGAACAA  
AGGAAAGTGTTCAAAGCAGGCTTATAATGCCTGAATCTTTTAGCATGGAATAATAATATA  
TAACCTTGGTTATATTTTGTGGCTTTTATAACTCGAGTAATGATCGATAGGGATAGTTG  
GGGGTGCTCATATTCAGCGGGTAGCGGTGAAATGCGATGATCCGCTGAAGATGAACATA  
GCGAAAGCATTACCAAGGATATCTTCT

>P087\_01

AGCTCCAATAGCGTATACTAATGTTGCTGCAGTTAAAAAGCTCGTAGTCGAAATTTCTGAC  
CTCTCAAACGCGAACTGCGACGTATGTTGCATGCTTCAAGTGTGTCGGTCATACTTCT  
GGAGAGTGCTTCTCCATTGATTGGGTGGTGTACGACTCGGATCATTTACTGTGAACAA  
AGGAAAGTGTTCAAAGCAGGCTCAAAAACGCCTGAATCTTTTAGCATGGAATAATAATATA  
ATAACTTAGGTTATATTTTGTGGCTTCTATAACCCAAGTAATGATCAATAGGGATAGTT  
GGGGTGCTCATATTCAGCGGGTAGCGGTGAAATGCGATGATCCCATGAAGATGAACATA  
TGCGAAAGCATTACCAAGGATATCTTCT

>P088\_04

AGCTCCAATAGCGTATATCAATGTTGCTGCAGTTAAAAAGCTCGTAGTCGGATATGTGTT  
CTGTCAAGCTCGAACCTCTGCCACCGTGCAGTTGGTCTCGAACTGCTTGCAGGATCATCTT  
TCTGATGACTGTTTTCTGCCCTTGATTGGGTGCGTTGCATGAATCAGAACTTTTACTGTG  
AGTAAATGAAAGTGCTCAACGCACGCTCACTGCATGCTTGGATCTTTTAGCATGGAATAA  
TAAGATAGAACTTTGGTTCTTTTTGTGGCTTCCAGGACCAAGTAATGATCAAAAGGGA  
TAGTTGGGGGTGCTTATATTTGGAGGGTACCGGTGAAATGGGATGATCCTCTAAAGATAA  
ACTAATGCGAAAAGCATTACCAAGGATATTTTCT

>P089\_01

AGCTCCAATAGCGTATATTAATGTTGCTGCAGTTAAAAAGCTCGTAGTCGAAATTTCTGGT  
CTGTCAAACCTCGAACTACACCTTACACAGGAGTATGCTCTCAAGTGTGTCGGACCATCC  
TTCTGGAGAGTGCTTCTTCTTCTGATTGAGTGGTGCATAATTCAGATCGTTTACTGTG

AGCAAATGGGAGTGTTCAAAGCAGGCTTTACTGCTTGAACCGTTTAGCATGGAATAATAA  
AATTGAACTTCGGTTCTATTTTGTGGCTTCAAGAACCCAAGTTATGATTGATAGGGATG  
GTTGGGGGTGCTCGTATTTCAGGGGGGAGCGGTGAAATGCAATGAGCCTCTGAAGACGGAC  
TAATGCGAAAAGCATTACCAAGGACATCTTCT

>P090\_03

AGCTCCAATAGCGTATATTAATGTTGCTGCAGTTAAAAAGCTCGTAGTCGATGTTCTGGT  
CTGTCAAAGCTCGAACTGCACCAAAAATGGAGCATGTCTCGAATCGCTTGCAGGACCATCCTT  
CTGGAAAGTGCTTCTTCTCTTGATTGCGCGGTTGCATGATCCAGATCGTTTACTGTGAG  
CAAATGGGAGTGTTCAAAGCAGGCTTTTCTGTTTGAACCGTTTAGCATGGAATAATAATA  
TTGAACTTCGGTTTAAATTTTGTGGCTTCATAAACCCAAGTTATGATCGATAGGGATGGT  
TGGGGGTGCTCGTATTTCAGGGGGGAGCGGTGAAATGCAATGAGCCTCTGAAGACGGACTA  
ATGCGAAAAGCATTACCAAGGACATCTTCT

>P091\_02

AGCTCCAATAGCGTATATTAATGTTGCTGCAGTTAAAAAGCTCGTAGTCGATTTTCTGAC  
CTGTCAAAGCTCGAACTGCACCTTTTACAGGAGCATGTCTCGAATCGTTTGCAGGATCATCC  
TTCTGGAAAGCRCTCCTGCTCTTGRITGAGTGGTTGTGTAATTCAGATCGTTTACTGTGA  
GCAAATGGGGGTGTTCAAAGCAGACTTTTCTGTTTGAACCGTTTAGCATGGAATAATAAAA  
ATTGAACTTAGGTTTAAATTTTGTGGCTTCAAAAACCCAAGTTATGATCGATAGGGATGGT  
TGGGGGTGCTCGTATTTCAGGGGGGAGCGGTGAAATGCAATGATCCTCTGAAGACGRAC  
ATGCGAAAAGCATTACCAAGGACATCTTCT

>P092\_04

AGCTCCAATAGCGTATATTAATGTTGCTGCAGTTAAAAAGCTCGTAGTCGATTTTCTGAT  
CTGTCAAAGCTCGAACTGCACCTTTTACAGGAGCATGTCTCGAATCGTTTGCAGGATCATCC  
TTCTGGAAAGCRCTCCTGCTCTTGRITGAGTGGTTGTGTAATTCAGATCGTTTACTGTGA  
GCAAATGGGGGTGTTCAAAGCAGACTTTTCTGTTTGAACCGTTTAGCATGGAATAATAAAA  
ATTGAACTTAGGTTTAAATTTTGTGGCTTCAAAAACCCAAGTTATGATCGATAGGGATGG  
TTGGGGGTGCTCGTATTTCAGGGGGGAGCGGTGAAATGCAATGATCCTCTGAAGACGGACT  
AATGCGAAAAGCATTACCAAGGACATCTTCT

>P093\_03

AGCTCCAATAGCGTATATTAAGTTGCTGCAGTTAAAAAGCTCGTAGTCGATGATCAGGT  
CTGCAAACCGGAACTGCACCTTAGGGAGCATGCTTCGTAAGTTTGCAGGCTTCTTCTCT  
GGAAAGCGCTTCTTCTCTTGATTGAGTGGTTGTGCAAATCCAGGTCTTTTACTGTGAACA  
AATGGAAGTGTTCAAAGCAGGCTTTATAGCAGGCTTGAACCGTTTAGCATGGAATAATAAA  
AATTGAACTTCGGTTCTATTTTGTGGCTTGGGGACCCAAGTTATGATCGATAGGGATG  
GTTGGGGGTGCTCGTATTTCAGGGGGGAGCGGTGAAATGCAATGAGCCTCTGAAGACGGAC  
TAATGCGAAAAGCATTACCAAGGACATCTTCT

>P094\_03

AGCTCCAATAGCGTATATTAAGTTGCTGCAGTTAAAAAGCTCGTAGTTCATTTTCTGGC  
CTGTCAAAGCTCGGACTGCACCTTTACACAGGAGCAGCTTCGATCTGTTTGCAGGACATC  
TTTCTGGAGAGCACTTCTTCTCTTGATTGAGTGGTTGTGCAAATTCAGATCCTTTACTGTG  
AGCAAATGGGAGTGTTCAAAGCAGACTATCTGTTTGAACCGTTTAGCATGGAATAATAAAA  
AATTGAACTTCGGTTCTATTTTGTGGCTTCAAGAACCCAAGTTATGATCGATAGGGATGG  
TTGGGGGTGCTCGTATTTCAGGGGGGAGCGGTGAAATGCAATGAGCCTCTGAAGACGGACT  
AATGCGAAAAGCATTACCAAGGACATCTTCT

>P095\_01

AGCTCCAATAGCGTATATTAATGTTGCTGCAGTTAAAAAGCTCGTAGTCGATTTTCTGGT  
CTGTCAAAGCTCGAACTGCACCTTTTACAGGAGCATGTCTCGAATCGTTTGCAGGACATC  
TTTCTGGAGCGTGCTTCTTCTCTTGATTGAGTGGTTGTGCAAATTCAGATCCTTTACTGTG  
AGCAAATGGGAGTGTTCAAAGCAGGCTTTTCTGTTTGAACCGTTTAGCATGGAATAATAAA  
AATTGAACTTCGGTTCTATTTTGTGGCTTCAAGAACCCAAGTTATGATCGATAGGGATG  
GTTGGGGGTGCTCGTATTTCAGGGGGGAGCAGTGAATGCAATGAGCCTTTGAAGACGGAAC  
TAATGCGAAAAGCATTACCAAGGACATCTTCT

>P096\_03

AGCTCCAATAGCGTATATTAATGTTGCTGCAGTTAAAAAGCTCGTAGTTCATTTTCTGGT  
CTGTCAAAGCTCGAACTGCATCTTAAAGAAGCATGTCTCGAATCGTTTGCAGGACATCCTT  
CTGGAAAGCGCTTCTTCTCTTGATTGAGTGGTTGTGCAAATTCAGATCGTTTACTGTGAGC  
AAATGGGAGTGTTCAAAGCAGGCTTTTCTGTTTGAACCGTTTAGCATGGAATAATAAAAAT  
TGAACTTCGGTTTAAATTTTGTGGCTTCAAGAACCCAAGTTATGATCGATAGGGATGGTT  
GGGGGTGCTCGTATTTCAGGGGGGAGCGGTGAAATGCAATGAGCCTCTGAAGACGAACTAA  
TGCGAAAAGCATTACCAAGGACATCTTCT

>P097\_02

AGCTCCAATAGCGTATACTAATGTTGCTGCAGTTAAAAAGCTCGTAGTTCATTTTCTAGT  
CTGTCAAACACCAGCTGCATCCTTTATGGGCGCATGTCTCGGTCTGTTTGCAGACTATCC  
TTCTGGAGAGTCATTTCTTCTTGATTGAGTGGTTTGACAATTCAGATCGTTTACTGTGA

GCAAATGGGAGTGTTCAAAGCAGACATATCTGTTTGAACCGTTTAGCATGGAATAATAAAA  
ATTGAACCTCGGTTTTATTTTGTGGCTTCAAGAACCCAAGTTATGATCGATAGGGATGG  
TTGGGGGTGCTCGTATTACAGGGGGAGCGGTGAAATGCAATGAGCCTCTGAAGACGTACT  
AATGCGAAAGCATTACCAAGGACATTTTCT

>P098\_05

AGCTCCAATAGCGTATATTAATGTTGCTGCAGTTAAAAAGCTCGTAGTTCATTTTCTGGT  
CTGTCAAACCTCGAACTGCACCTTTTACAGGAGCATGTCTCGAATCGTTTGCAGGACCATCT  
TTCTGGAGAGTGCTTCTTCTCTTGATTGAGTGGTTGCACAATTCAGATCGTTTACTGTGA  
GCAAATGGGAGTGTTCAAAGCAGGCTTTCTGTTTGAACCGTTTAGCATGGAATAATAAAA  
TTGAACCTCGGTTTTATTTTGTGGCTTCAAAAACCCAAGTTATGATCGATAGGGATGGT  
TGGGGGTGCTCGTATTACAGGGGGAGCGGTGAAATGCAATGAGCCTCTGAAGACGGACTA  
ATGCGAAAGCATTACCAAGGACATCTTCT

>P099\_05

AGCTCCAATAGCGTATATTAATGTTGCTGCAGTTAAAAAGCTCGTAGTTCATTTTCTAGC  
CTGWYAAACTCGAACTGYACCTTTTACAGGARCATGTCTCGAATCGTTTGCAGGCTATCC  
TTCTGGAGAGTGCTTCTTCTCTTGATTGAGTGGTTGCGCAATTCAGATCGTTTACTGTGA  
GCAAATGGGAGTGTTCAAAGCAGACTTTTCTGTTTGAACCGTTTAGCATGGAATAATAAAA  
ATTGAACCTCGGTTTTATTTTGTGGCTTCAAAAACCCAAGTTATGATCGATAGGGATGG  
TTGGGGGTGCTCGTATTACAGGGGGAGCGGTGAAATGCAATGAGCCTCTGAAGACGGACT  
AATGCGAAAGCATTACCAAGGACATCTTCT

>P100\_04

AGCTCCAATAGCGTATATTAATGTTGTTGCTGCAGTTAAAAAGCTCGTAGTTCGAATTTCTGAT  
CTGCAAACTCGGACTGGCTTCTTAAGTAAGTACGCTTCGAATGTTTGCAGGATCATCT  
TTCTGGAGAGTGCTTCTGCCCTTGATTGGGTTGGTTCGATCCAGTTCCTTTTACTGTG  
AGCAAATGGGAGTGTTCAAAGCAGGCTTTATGTCATGCCTGAACCGTTTAGCATGGAATA  
ATAAGATAGAACTTCGGTACTATTTGTTGGCTTCTAGAACCAAAGTAATGATTGAAAGG  
GATAGTTGGGGTGCTCATATTCGGGGGTAGCGGTGAAATGCAATGATCCCCTGAAGAT  
GAACTAATGCGAAAGCATTACCAAGGATATCTTCT

>P101\_01

AGCTCCAATAGCGTATATTAATGTTGCTGCAGTTAAAAAGCTCGTAGTTCGAATTTCTAAT  
TTGTCAAGCTCGGTCTACTTCTTGCAAAAGAGTATGATTTCGAATGCTTGCAGATTTATCT  
TTCTGGACAGTACTTCTGTGCTTGATTGTGTGCGTTGTACGATCCAGATCTTTTACTGTG  
AGCAAATGAGAGTGTTCAAAGCAGGCAATGTTGCCTGAATCGTTTAGCATGGAATAATAA  
GATAGAACTATGGTTTTATTTTGTGGCTTCTAGAACCAAAGTAATGATCGAAAGGGATA  
GTTGGGGGTGCTCATATTCAGGGGTAGCGGTGAAATGCGATGATCCTCTGAAGATGAAC  
TAATGCGAAAGCATTACCAAGGATATCTTCT

>P102\_01

AGCTCCATAGTGTATATTAATGTTGCTGCAGTTAAAAAGCTCGTAGTTCGAATTTCTGAT  
CTGTCAAACCTCGAACTGCTTTTTATATAAAAAGTATGTCTCGAATGTTTGCAGGATCATCT  
TGTTGAAGAGCATTTCTGCCCTTGATTGGGTTGGTTATGCAATTCAACTCTTTTACTGTG  
AGCAAATGGGAGTGTTCAAAGCAGGTTTTATCTGCCTGAACCGTTTAGCATGGAATAAATG  
AAATATAACTTCGGTTTTATTTTGTGGCTTAAAAACCAAAGTAATGATCTAAAGGGATA  
GTTGGGGGTGCTCATATTCAGGGGTAGCGGTGAAATGCGATGATCCTCTGAAGATGGAC  
TAATGCGAAAGCATTACCAAGGATATCTTCT

>P103\_01

AGCTCCAATAGTGTATATTAATGTTGCTGCAGTTAAAAAGCTCGTAGTTCGAATTTGTGAT  
TTGTCAAACCTCGAGCTATCTTTTTACAAGAGTACGTTTCGAATGTTTGCAGATCATCAT  
TTTGAAAAGTTGATCTGCCCTTGATTGGGTTGGATGTGCGATTCAAATCTTTTACTGTGA  
GCAAATGGGAGTGTTCAAAGCAGGTTTTACTTGCCTGGACCGTTTAGCATGGAATAATAA  
TATAGGACTTGGGTACTATTTTATTGGCTTTAGAACCAAAGTAATGATCTAAAGGGATAG  
TTGGGGGTGCTCATATTCAGAGGGTAGCGGTGAAATGCGATGATCCTCTGAAGATGGACT  
AAAGCGAAAGCATTACCAAGGATATTTTCT

>P104\_07

AGCTCCAATAGTGTATATTAATGTTGCTGCAGTTAAAAAGCTCGTAGTTCGAATTTGTGAT  
CTGTCAAACCTCGAACTGCTCTTTCTAAAAGAGTACGTCTCGAATGTTTGCAGGATCATCA  
TTTTGAAAAGTGTCTTCTGCCCTTGATTGGGTTGGATTACGATTCAAATCTTTTACTGTG  
AGCAAATGGGAGTGTTCAAAGCAGGTTTTATCTTGCCTGAACCGTTTAGCATGGAATAATA  
AAATAGGACTTCGGTACTATTTTGTGGCTTTAGAACCAAAGTAATGATCAAAGGGATA  
GTTGGGGGTGCTCATATTCAGAGGGTAGCGGTGAAATGCGATGATCCTCTGAAGATGGAC  
TAAAGCGAAAGCATTACCAAGGATATTTTCT

>P105\_05

AGCTCCAATAGTGTATATTAATGTTGCTGCAGTTAAAAAGCTCGTAGTTCGAATTTGTGAT  
TTGTCAAACCTCGAACTGCTCTTTCTTAAGAGTATGTTTCGAATCGTTTGCAGATCTTCA  
TTTTGAAAAGTGTCTTCTGCCCTTGATTGGGTTGGATGTGCAATTCAAATCTTTTACTGTG

AGCAAATGGGAGTGTTCAAAGCAGGTTTTACTTGCCTGAACCGTTTAGCATGGAATAATA  
AAATAGGACTTCGGTACTATTTTGTGGCTTTAGAACCAAAGTAATGATCTAAAGGGATA  
GTTGGGGGTGCTCATATTCAGAGGGTAGCGGTGAAATGCGATGATCCTCTGAAGATGGAC  
TAAAGCGAAAGCATTACCAAGGATATTTTCT

>P106\_01

AGCTCCAATAGTGTATACTAATGTTGCTGCAGTTAAAAAGCTCGTAGTCGAATTTCTGAC  
TTGTCAAACCTCGAACTGCCTTTATTTGGTATGTCTCGAATTGTTTGCGGGTCATCTTTCTG  
GAAAGTACTTCTGCCTTTAATTAGGTTGGTTGTATCATCTGAACCTTTACTGTGAGCAA  
ATGGGAGTGTTCAAAGCAGACTTTATTTGTCTGAACCGTTTAGCATGGAATAATAATAA  
AACTTTGGTTTTATTTTGTGGCTTTTAAAACCCAAGTAATGATAGAAAGGGATAGTTGG  
GGGTGCTCATATTCAGGGGGTAGCGGTGAAATGCGATGATCCTCTGAAGATGAACTAATG  
CGAAAGCATTACCAAGGATATCTTCT

>P107\_01

AGCTCCAATAGTGTATACTAATGTTGCTGCAGTTAAAAAGCTCGTAGTCGAATTTCTGAC  
TTGTCAAACCTCGAACTGATCTTTTCAAGATTACGTCTCGAATCGTTTGCGGGTCATCAT  
CTGGAAAGTACTTCTGCCTTTGATTAGGTCGGTTGTATAATCCTGAACCTTTACTGTGAG  
CAAATGGGAGTGTTCAAAGCAGGCTTAATTGCCTGAACCGTTTAGCATGGAATAATAATA  
TAAAACCTTTGGTTTTATTTTGTGGCTTTTAAAACCTTAGTAATGATCGAAAGGGATAGT  
TGGGGGTGCTCATATTCAGGGGGTAGCGGTGAAATGCGATGATCCTCTGAAGATGAACTA  
ATGCGAAAGCATTACCAAGGATATCTTCT

>P108\_05

AGCTCCAATAGTGTATATTAATGTTGCTGCAGTTAAAAAGCTCGTAGTCGAATGTCTGTT  
CTGTCAAACCTCGAACCGTTTTTCACTGAAAGACGCGTCTCGAATTGTTTGCAGAACATCA  
TTCTGGAAAGTGTCTTCTGCCCTTGATTGGGTTGGTTGTACGATCCAGAACATTTACTGTG  
AGCAAATGGGAGTGTTCAAAGCAAGCTTTTAGCTATGCCTGAACCGTTTAGCATGGAATA  
ATAAGATATAACTTTGGTTTTATTTTGTGGCTTGCTAAAACCCAAGTAATGATCGAAAG  
GGATGTTTTGGGGGTGCTCATATTCAGGGGGTACCGGTGAAATGGGATGATCCTCTGAAG  
ATGAACTAATGCGAAAGCATTACCAAGGACATTTTCT

>P109\_01

AGCTCCAATAGTGTATATTAATGTTGCTGCAGTTAAAAAGCTCGTAGTCGAATATCTAGT  
TCTCAAACCTCGAACTGGTCTTTTCCAAAGATCACGTCTCGAACTGTTTGGAGACTATCTT  
TCTGAAAGTGTCTTCTGCCCTTGATTGGGTTGGTTGTACGATCCAGAACATTTACTGTGA  
GCAAATGGGAGTGTTCAAAGCAGACTTTTAGTTTGTGTTGAACCGTTTAGCATGGAATAA  
AATATATAACTTAGGTTTTATTTTGTGGCTTGCTAAAACCCAAGTAATGATCAAAAGG  
ACGGTTTTGGGGGTGCTCATATTCAGGGGGTACCGGTGAAATGGGATGATCCTCTGAAGAT  
GAACTAATGCGAAAGCATTACCAAGGACATTTTCT

>P110\_10

AGCTCCAATAGTGTATATTAATGTTGCTGCAGTTAAAAAGCTCGTAGTCGAATATCTGTC  
TTTTAAACCTCGAACCGTGTTTTTCTAAAGCACGCGTCTCGAATTGTTTGAAGGACATCCT  
TCTGAAAGTGTCTTCTGCCCTTGATTGGGTTGGTTGTACGATCCAGAACATTTACTGTGA  
GCAAATGGGAGTGTTCAAAGCAGGCTTTTAGTTATGCTTGAACCGTTTAGCATGGAATAA  
TAAAATATAACTTAGGTTTTATTTTGTGGCTTGCTAAAACCCAAGTAATGATCAAAAGG  
GACGGTTTTGGGGGTGCTCATATTCAGGGGGTACCGGTGAAATGGGATGATCCTCTGAAGA  
TGAACTAATGCGAAAGCATTACCAAGGACGTTTTTCT

>P111\_06

AGCTCCAATAGTGTATATTAATGTTGCTGCAGTTAAAAAGCTCGTAGTCGAATGTCTGAC  
CCTTAAACCTCGAACTGTCTTTTTCTAAGAGACACGTCTCGAACTGTTTGGAGGTCATCTT  
TCTGAAAGTGTCTTCTGCCCTTGATTGGGTTGGTTGTACGATCCAGAACATTTACTGTGA  
GCAAATGGGAGTGTTCAAAGCAGGCTTTTAGTTATGCTTGAACCGTTTAGCATGGAATAA  
TGAAATATAACTTAGGTTTTATTTTGTGGCTTGCTAAAACCCAAGTAATGATCAAAAGG  
GACGGTTTTGGGGGTGCTCATATTCAGGGGGTACCGGTGAAATGGGATGATCCTCTGAAGA  
TGAACTAATGCGAAAGCATTACCAAGGACGTTTTTCT

>P112\_01

AGCTCCAATAGTGTATATTAATGTTGCTGCAGTTAAAAAGCTCGTAGTCGAATGTCTGAC  
CTTTAAACCTCGAACTGTCTTTTTCTAAGAGACACGTCTCGAACTGTTTGAAGTCATCTT  
TCTGAAAGTGTCTTCTGCCCTTGATTGGGTCGGTTGTATGATCCAGAACATTTACTGTGA  
GCAAATGGGAGTGTTCAAAGCAGGCTTTTAGTTATGCTTGAACCGTTTAGCATGGAATAA  
TGAAATATAACTTAGGTTTTATTTTGTGGCTTGCTAAAACCCAAGTAATGATCAAAAGG  
GACGGTTTTGGGGGTGCTCATATTCAGGGGGTACCGGTGAAATGGGATGATCCTCTGAAGA  
TGAACTAATGCGAAAGCATTACCAAGGACGTTTTTCT

>P113\_01

AGCTCCAATAGTGTATATTAATGTTGCTGCAGTTAAAAAGCTCGTAGTCGAATGTCTGAC  
TTGTCAAACCTCGAACTGTCTTTTCACTGAAGAACACGTCTCGAATTGTTTGCAGTTCATCA  
TTCTGGAAAGTGTCTTCTGCCCTTGATTGGCTCGGTTGTGCAATCCAGAACATTTACTGTG

AGCAAATGGGAGTGTTCAAAGCAGGCTATTAGCTATGCTTGAACCGTTTAGCATGGAATA  
ATAAGATATAACTTAGGTTTTATTTGTTGGCTTGCTAAAACCCAAGTAATGATCGAAAG  
GGATGGTTTGGGGGTGCTCATATTCAGGGGTACCGGTGAAATGGGATGATCCTCTGAAG  
ATGAACTAATGCGAAAGCATTACCAAGGACATTTTCT

>P114\_01

AGCTCCAATAGTGTATATTAATGTTGCTGCAGTTAAAAAGCTCGTAGTCGAATGTCTGCC  
CTGTCAAACCTCGTACTGTCTTTTACTAAAGGACAGTTACGAATTGTTTTCGAGGCATCAT  
TCTGGAAAGTGCTTCTGCCCTTGATTGGGTTGGCTGTACGATCCAGAACATTTACTGTGA  
GCAAATGGGAGTGTTCAAAGCAGGCTTTTAGCTATGCTTGAACCGTTTAGCATGGAATAA  
TGATATATAACTTAGGTTTTATTTTGTGGTTTGCTAAAACCCAAGTAATGATCGAAATG  
GATGGTTTGGGGGTGCTTATATTGAGGGGTAGCGGTGAAATGCGATGATCCTCTCAAGA  
TAACTAATGCGAAAGCATTACCAAGGACATTTTAT

>P115\_01

AGCTCCAATAGTGTATATTAATGTTGCTGCAGTTAAAAAGCTCGTAGTCGAATATCTGCC  
TTGTCAAACCTCGAACTGTTTTTCTGAAAGACACGTCTCGTTATGTTTTCGATGCATCA  
TTCTGGAAAGTGCTTCTGCCCTTGATTGGGTTGGTTGTACGATCCAGAACATTTACTGTG  
AGCAAATGGGAGTGTTCAAAGCAAGCTTTTAGTTATGCTTGAACCGTTTAGCATGGAATA  
ATAATATATAACTTAGGTTTTATTTTGTGGCTTGCTAAAACCCAAGTAATGATCGAAAGG  
GATGGTTTGGGGGTGCTCATATTCAGGGGTACCGGTGAAATGGGATGATCCTCTGAAGA  
TGACTAATGCGAAAGCATTACCAAGGATATTTTCT

>P116\_01

AGCTCCGATAGTGTATATTAATGTTGCTGCAGTTAAAAAGCTCGTAGTCAAATGTCTGTT  
CTGTCAAACCTCGAACTGTCTTCTGAAAGACACGTCTCGTTATGTTTTCGAGGCATCT  
TTCTGGAAAGTGCTTCTGCCCTTGATTGGGTTGGTTGTACGATCCAGAACATTTACTGTG  
AGCAAATGGGAGTGTTCAAAGCAGGCTTTTGTATGCTTGAACCGTTTAGCATGGAATA  
ATAAAATATAACTTAGGTTTTATTTTGTGGCTTGCTAAAACCCAAGTAATGATCAAAG  
GGATGGTTTGGGGGTGCTCATATTCAGGGGTACCGGTGAAATGGGATGATCCTCTCAAG  
ATGAACTAATGCGAAAGCATTACCAAGGACATTTTCT

>P117\_01

AGCTCCAATAGTGTATATTAATGTTGCTGCAGTTAAAAAGCTCGTAGTCGAATGTCTGCC  
TCGTCAAACCTCGAACTATGTTCTATGAACATACGTCTCGAACTGTTTTCGAGGCATCATT  
CTGGAAAGTGCTTCTGCCCTTGATTGGGTTGGTTGTACGATCCAGAACATTTACTGTGAG  
CAAATGGGAGTGTTCAAAGCAGGCTTTTAGCTACGTTGAACCGTTTAGCATGGAATAAT  
AAAATATAACTTAGGTTTTATTTTGTGGCTTGCTAAAACCCAAGTAATGATCAAAGGG  
ATGGTTTGGGGGTGCTCATATTCAGGGGTACCGGTGAAATGGGATGATCCTCTGAAGAT  
GAACTAGTGCAGAAAGCATTACCAAGGACATTTTCT

>P118\_06

AGCTCCAATAGTGTATATTAATGTTGCTGCAGTTAAAAAGCTCGTAGTCGAATATCTGAC  
TTGTCAAACCTCGAACTATCTTTTAAAAAAGGATACGTCTCGAATTGTTTTCGAGTCATCA  
TTCTGGAAAGTGCTTCTGCCATTAATTTGGTTGGTTGTACGATCCAGAACATTTACTGTG  
AGCAAATGGGAGTGTTCAAAGCAAGCTTTAAGCTACGCTTGAACCGTTTAGCATGGAATA  
ATAATATATAACTTAGGTTTTATTTTGTGGCTTGCTAAAACCCAAGTAATGATCGAAAG  
GGATGGTTTGGGGGTGCTCATATTCAGGGGTACCGGTGAAATGGGATGATCCTCTGAAG  
ATGAACTAATGCGAAAGCATTACCAAGGACATTTTCT

>P119\_01

AGCTCCAATAGTGTATATTAATGTTGCTGCAGTTAAAAAGCTCGTAGTCGAATGTCTGTT  
TTGTCAAACCTCGAACTATCTTTCAAGGAAGGATACGTCTCGTTATGTTTTCGAGGCATCA  
TTCTGGACAGTGCTTCTGCCATTAGTTTGGTTGGTTGTACGATCCAGAACATTTACTGTG  
AGCAAATGGGAGTGTTCAAAGCAAGCTTTTAGTACGCTTGAACCGTTTAGCATGGAATAA  
TAATATATAACTTAGGTTTTATTTTGTGGCTTGCTAAAACCCAAGTAATGATCGAAAGG  
GATGGTTTGGGGGTGCTCATATTCAGGGGTACCGGTGAAATGGGATGATCCTCTGAAGA  
TGACTAATGCGAAAGCATTACCAAGGACATTTTCT

>P120\_01

AGCTCCAATAGTGTATATTAATGTTGCTGCAGTTAAAAAGCTCGTAGTCGAATGTCTGTC  
TTGTCAAACCTCGAACTATCTTTCTGAAAGGATACGTCTCGTTACGTTTTCGAGGCATCA  
TTCTGGAAAGTGCTTCTGCCATTAGTTTGGTTGGTTGTACGATCCAGAACATTTACTGTG  
AGCAAATGGGAGTGTTCAAAGCAAGCTTTTAGTTACGCTTGAACCGTTTAGCATGGAATA  
ATAATATATAACTTAGGTTTTATTTTGTGGCTTGCTAAAACCCAAGTAATGATCGAAAGG  
GATGGTTTGGGGGTGCTCATATTCAGGGGTACCGGTGAAATGGGATGATCCTCTGAAGA  
TGACTAATGCGAAAGCATTACCAAGGACATTTTAC

>P121\_01

AGCTCCAATAGTGTATACTAATGTTGCTGCAGTTAAAAAGCTCGTAGTCGAATTTCTGAC  
CTGTCAAACCTCGAACTGTCTTAATAGGACACGTTTCGGCATGTTTGTGGTTCATCATT  
TGGAAAGTGCTTCTGACCTTGATTGGTTTGGATGTACGATCTAAAGCGTTTACTGTGAGC



AAATGGGAGTGTTCAAAGCAGGCTTTTTAGCATGCCTGAACCGTTTAGCATGGAATAATG  
ATATATAACTTCGGTTATATTTTCGTTGGCTTATAAACTGAAGTAATGATCGAAAGGGAT  
AGTTGGGGGTGCTCATATTCAGGGGTAGCGGTGAAATGCATTGATCCTCTGAAGATGAA  
CTAATGCGAAAGCATTACCAAGGATATCTTCT

>P122\_01

AGCTCCAATAGTGTATACTAATGCTGCTGCAGTTAAAAAGCTCGTAGTCGAATTTCTGGT  
TTGCCAAACTCGTACTTTTCTTTAAAGAAGAATTTGTTACGAATTGTTTGCAAGCCATAT  
TTCTGGAAAATGTTTCTGCCCTTGATTGGGTTGGTTTCATAATTCAGAGCGTTTACTGTG  
AGAAAATGGGAGTGTTCAAAGCAGGCTACTTTGCCTGAACCGTTTAGCATGGAATAATAA  
TATATAGCTCTGGTTATATTTTATTGGCTTATACATTAGAGTAATGATCGAAAGGGATAG  
TTGGGGGTGCTCATATTCAGTGGGTAGCGGTGAAATGCATTGATCCTCTGAAGATGAACT  
AATGCGAAAGCATTACCAAGGATATTTTCT

>P123\_03

AGCTCCAATAGTGTATACTAATGTTGCTGCAGTTAAAAAGCTCGTAGTCGAATTTCTGGT  
TCTTCAAACCTCGCTCGGCTCTTCAAAGAAGAGCTTAACCGTACTGTTTGTGAATCATTA  
TTTTGAAAAATACTTCTGCCCTTGATTGGTGGTTGTATAATTCAGAGACTTTACTGTG  
AGCAAATGGGAGTGTTTAAAGCAGGCATCTATGCCTGAACGTTTAGCATGGAATAATGA  
AATATAACTTTGTTTGTATTTTGTGGCTTTTATAAATTGAGTAATGATCGAAAGGGATG  
GTTGGGGGTGCTCATATTCAGGGGTAGCGGTGAAATGCATTGATCCTCTGAAGATGAAC  
AATGCGAAAGCATTACCAAGCACATTTTCT

>P124\_02

AGCTCCAATAGTGTATACTAATGTTGCTGCAGTTAAAAAGCTCGTAGTCGAATTTCTGGT  
CTGTCAAACCTCGTGCATTTCTCAAAGAAGAATATGCTACGAATTGTTTGTGGATCATCA  
TTCTGGAGAGTGCTTCTGCCCTTGATTGGGTTGGTTGTACAATCCAGAGCATTACTGTG  
AGCAAATGGGAGTGTTCAAAGCAGGCTTTATGTTGCCTGAACCGTTTAGCATGGAATAA  
TGAAATATAACTCAGGTTATATTTTCGTTGGCTTATTCAATTTGAGTAATGATTGAAAGGG  
ATAGTTGGGGGTGCTCATATTCAGGGGTAGCGGTGAAATGCTTTGATCCTCTGAAGATG  
AACTAATGCGAAAGCATTACCAAGGATATTTTCT

>P125\_02

AGCTCCAATAGTGTATACTAATGTTGCTGCAGTTAAAAAGCTCGTAGTCGAATTTCTGAC  
CTGTCAAACCTCGGACAGTTCTTCAAAGAAGAATTTGTTCCGCCACGTTTGTGGGTATCA  
TTCTGGAAAAGTGCTTCTGCCCTTGATTGGGTTGGTTGTACGATCCAGAGCATTACTGTG  
AGCAAATGGGAGTGTTCAAAGCAGGCTATATGCATGCCTGAACCGTTTAGCATGGAATAA  
TGAAATATAACTCTGATTATATTTTCGTTGGCTTATAAAGTTAGAGTAATGATTGAAAGGG  
ATAGTTGGGGGTGCTCATATTCAGGGGTAGCGGTGAAATGCTTTGATCCTCTGAAGATG  
AACTAATGCGAAAGCATTACCAAGGATATTTTCT

>P126\_01

AGCTCCAATAGTGTATACTAATGTTGCTGCAGTTAAAAAGCTCGTAGTCGAATTTCTGAC  
CCGTCAAACCTCGCGCGGTTCTTCAAAGAAGAATCTGTCTGTAATGTTTGTGGGTATCA  
TTCTGGAAAAGTACTTCTGCCCTTGATTGGGTTGGTTGTACGATCCAGAGCATTACTGTG  
AGCAAATGGGAGTGTTCAAAGCAAGCTTTATGCATGCCTGAACCGTTTAGCATGGAATAA  
TGAAATATAACTCTGATTATATTTTCGTTGGCTTATAAATTAGAGTAATGATTGAAAGGG  
ATAGTTGGGGGTGCTCATATTCAGGGGTAGCGGTGAAATGCATTGATCCTCTGAAGATG  
AACTAATGCGAAAGCATTACCAAGGATATCTTCT

>P127\_03

AGCTCCAATAGTGTATACTAATGTTGCTGCAGTTAAAAAGCTCGTAGTCGAATTTCTGAT  
CCGTCAAACCTCGTGCCATTCTTCAAAGAGGAATGCGTCACGAACTGTTTGTGGATCATCA  
TTCTGGAAAAGTGCTTCTACCCTTGATTGGGTCGGTTGTGCAATCCAGAGCATTACTGTG  
AGCAAATGGGAGTGTTCAAAGCAGGCTTTATGCATGCCTGAACCGTTTAGCATGGAATAA  
TGAAATATAACTCTGATTATATTTTCGTTGGCTTATAAATTAGAGTAATGATCGATAGGG  
ATAGTTGGGGGTGCTCATATTCAGGGGTAGCGGTGAAATGCATAATCCTCTGAAGATG  
AACTAATGCGAAAGCATTACCAAGGATATCTTCT

>P128\_04

AGCTCCAATAGTGTATACTAATGTTGCTGCAGTTAAAAAGCTCGTAGTCGAACCTTCTGAT  
CTGTCAAACCTCGTACTATCTTCAAAGAAGGATACGATACGAATTGTTTGTGGATCATCT  
TTCTGGAGAGTGCTTCTGCCCTTGATTGGGTTGGTTGTACGATCCAGAGCATTACTGT  
GAGCAAATGGGAGTGTTCAAAGCAGGCTTTATGCATGTCTGAACCGTTTAGCATGGAATA  
ATGATATATAACTCTGGTTATATTTTCGTTGGCTTATAAATTAGAGTAATGATCGATAGG  
GATAGTTGGGGGTGCTCATATTCAGGGGTAGCGGTGAAATGCATTGATCCTCTGAAGAT  
GAACTAATGCGAAAGCATTACCAAGGATATTTTCT

>P129\_04

AGCTCCAATAGTGTATACTAATGTTGCTGCAGTTAAAAAGCTCGTAGTCGAACCTTCTGAT  
CTGTCAAACCTCGTACTGTTCTTCAAAGAAGAATATGATACGAATTGTTTGTGGATCATCA  
TTCTGGAGAGTGCTTCTGCCCTTGATTGGGTTGGTTGTACGATCCAGAGCATTACTGTG

AGCAAATGGGAGTGTTCAAAGCAGGCTTTATGCATGTCTGAACCGTTTAGCATGGAATAA  
TGATATATAACTCTGGTTATATTTTCGTTGGCTTATAAAAATTAGAGTAATGATTGATAGGG  
ATAGTTGGGGGTGCTCATATTCAGGGGGTAGCGGTGAAATGCATTGATCCTCTGAAGATG  
AACTAATGCGAAAAGCATTACCAAGGATATTTTCT

>P130\_02

AGCTCCAATAGTGTATACTAATGTTGCTGCAGTTAAAAAGCTCGTAGTCGAACTTCTGAT  
CTGTCAAACCTCGTACTGTTCTTCAAAGAAGAATACGATACGAATTGTTTGTGGATCATCA  
TTCTGGAGAGTGCTTCTGCCCTTGATTGGGTTGGTTGTACGATCCAGAGCATTACTGTG  
AGCAAATGGGAGTGTTCAAAGCAGGCTTTATGCATGTCTGAACCGTTTAGCATGGAATAA  
TGATATATAACTCTGGTTATATTTTCGTTGGCTTATAAAAATTAGAGTAATAATCGATAGGG  
ATAGTTGGGGGTGCTCATATTCAGGGGGTAGCGGTGAAATGCATTGATCCTCTGAAGATG  
AACTAATGCGAAAAGCATTACCAAGGATATTTTCT

>P131\_05

AGCTCCAATAGTGTATACTAATGTTGCTGCAGTTAAAAAGCTCGTAGTCGAACTTCTGAC  
CTGTCAAACCTCGTGCCATTTTTCAAAGAAGGATGCGTTTCGAATTGTTTGTGGGTATCA  
TTCTGGAAAGTGCTTCTGCCCTTGATTGGGTTGGTTGCACGATCCAGAGCATTACTGTG  
AGCAAATGGGAGTGTTCAAAGCAGGCTTTATGCATGCCTGAACCGTTTAGCATGGAATAA  
TGAAATATAACTCTGATTATATTTTCGTTGGCTTATAAAAATTAGAGTAATGATCGAAAGGG  
ATAGTTGGGGGTGCTCATATTCAGGGGGTAGCGGTGAAATGCATTGATCCTCTGAAGATG  
AACTAATGCGAAAAGCATTACCAAGGATATTTTCT

>P132\_01

AGCTCCAATAGTGTATACTAATGTTGCTGCAGTTAAAAAGCTCGTAGTCGAACTTCTGAT  
CTGTCAAACCTCGTACCGTTCTTCAAAGAAGGATGTTTTACGAATTGTTTGTGGATCATCA  
TTCTGGAAAGTGCTTCTGCCCTTGATTGGGTTGGTTGTACGATCCAGAGCATTACTGTG  
AGCAAATGGGAGTGTTCAAAGCAGGCTTTATGCATGCCTGAACCGTTTAGCATGGAATAA  
TGAAATATAACTCTGATTATATTTTCGTTGGCTTATAAAAATTAGAGTAATGATCGAAAGGG  
TAGTTGGGGGTGCTCATATTCAGGGGGTAGCGGTGAAATGCATTGATCCTCTGAAGATG  
ACTAATGCGAAAAGCATTACCAAGGATATTTTCT

>P133\_03

AGCTCCAATAGTGTATACTAATGTTGCTGCAGTTAAAAAGCTCGTAGTCGAACTTCTGAT  
CTGTCAAACCTCGTACCGTTTTCAAAGAAGARCGMGTACGAATTGTTTGTGGGTATCA  
TTCTGGAAAGTGCTTCTGCCCTTGATTGGGTTGGTTGTACGATCCAGAGCATTACTGTG  
AGCAAATGGGAGTGTTCAAAGCAGGCTTTATGCATGCCTGAACCGTTTAGCATGGAATAA  
TGAAATATAACTCTGATTATATTTTCGTTGGCTTATAAAAATTAGAGTAATGATYGAAAGGG  
ATAGTTGGGGGTGCTCATATTCAGGGGGTAGCGGTGAAATGCATTGATCCTCTGAAGATG  
AACTAATGCGAAAAGCATTACCAAGGATATTTTCT

>P134\_02

AGCTCCAATAGTGTATACTAATGTTGCTGCAGTTAAAAAGCTCGTAGTCGAACTTCTGAC  
CTGTCAAACCTCATACCGTCTTTCAAAGAAGGACGCGTTACGAATTGTTTGTGGGTATCA  
TTCTGGAAAGTGCTTCTGCCCTTGATTGGGTTGGTTGTACGATCCAGAGCATTACTGTG  
AGCAAATGGGAGTGTTCAAAGCAGGCTTTATGCATGCCTGAACCGTTTAGCATGGAATAA  
TGAAATATAACTCTGATTATATTTTCGTTGGCTTATAAAAATTAGAGTAATGATCGAAAGGG  
ATAGTTGGGGGTGCTCATATTCAGGGGGTAGCGGTGAAATGCATTGATCCTCTGAAGATG  
AACTAATGCGAAAAGCATTACCAAGGATATTTTCT

>P135\_02

AGCTCCAATAGTGTATACTAATGTTGCTGCAGTTAAAAAGCTCGTAGTCGAACTTCTGAT  
CTGTCAAACCTCGTTCGCCTTTCAAAGAAGGGCGCGTTACGAATTGTTTGTGGATCATCA  
TTCTGGAAAGTGCTTCTGCCCTTGATTGGGTTGGTTGTACGATCCAGAGCATTACTGTG  
AGCAAATGGGAGTGTTCAAAGCAGGCTTTATGCATGCCTGAACCGTTTAGCATGGAATAA  
TGAAATATAACTCTGATTATATTTTCGTTGGCTTATAAAAATTAGAGTAATGATCGAAAGGG  
ATAGTTGGGGGTGCTCATATTCAGGGGGTAGCGGTGAAATGCATTGATCCTCTGAAGATG  
AACTAATGCGAAAAGCATTACCAAGGATATTTTCT

>P136\_07

AGCTCCAATAGTGTATACTAATGTTGCTGCAGTTAAAAAGCTCGTAGTCGAACTTCTGAT  
CTGTCAAACCTCGCACCGTCTTTCAAAGAAGGACGCGTTGTGAATTGTTTGTGGATCATCA  
TTCTGGAAAGTGCTTCTGCCCTTGATTGGGTTGGTTGTACGATCCAGAGCATTACTGT  
GAGCAAATGGGAGTGTTCAAAGCAGGCTTTATGCATGCCTGAACCGTTTAGCATGGAATA  
ATGAAATATAACTCTGATTATATTTTCGTTGGCTTATAAAAATTAGAGTAATGATCGAAAGG  
GATAGTTGGGGGTGCTCATATTCAGAGGGTAGCGGTGAAATGCATTGATCCTTTGAAGAT  
GAACATAATGCGAAAAGCATTACCAAGGATATTTTCT

>S001\_01

AGCTCCAATAGCGTATATTAACGTTGTTGCTGCAGTTAAAAGGCTCGTAGTCGAACTTCTGAT  
TTTGTGGGCGTGGTCTCTGCCTAGCGCAGTGCATCGCTGCTCACGAATCATCCTTTT  
GGATAGCATGGTCCGCTTCATTGTGTGATTATGTGACCCAAATCTTTTACTGTGAGTA

AATCAGAGTGTTTAAAACAGGCTTTACGCCTGAATGTTCTAGCATGGAATAATACGATAG  
GACTCGCGTTCTATTTTGTGGCTTTAGGACCCGAGTAATGATTGAAAGGGATAGTTGG  
GGGTGCTAGTATTTAATGGTCAGCGGTGAAATGCGTGGACCCATTAAAGACTAACTTATG  
CGAAAGCATTACCAAGGATATTTTCT

>S002a\_01

AGCTCCAATAGCGTATATTAACGTTGTTGCAGTTAAAAGGCTCGTAGTCAATTTATGAT  
TTTGTGGCGCGGCCCTCTGCCTAGCGCAGTGCCTGCGCCGCCACCGATCATCCTTTT  
GGAGAGCATGGTCGCGCTTGATTGCGTGCGCCATGTGATTCAAATCATTACTGTGAGTA  
AATCAGAGTGTTTAAAACAGGCTTTACGCTTGTATGTTCTAGCATGGAATAATACGATAG  
GACTTTGGTTCTATTTTGTGGCTTCTAGGACTAAAGTAATGATTGAAAGGGATAGTTGG  
GGGTGCTAGTATTTAACGGTCAGCGGTGAAATGCGTGGACCCGTTAAAGACTAACTTATG  
CGAAAGCATTACCAAGGATATTTTCT

>S002b\_02

AGCTCCAATAGCGTATATTAACGTTGTTGCAGTTAAAAGGCTCGTAGTCAATTTATGAT  
TTTGTGGCGCGGTCCTCTGCCTAGCGCAGTGCCTGCGCCGCCATGGATCATCCTTTT  
GGAGAGCACGTCGGCGCTTGATTGCGTGTGGCGTGCATTCAAATCATTACTGTGAGTA  
AATCAGAGTGTTTAAAACAGGCTTCACGCTTGTATGTTCTAGCATGGAATAATACGATAG  
GACTTTGGTTCTATTTTGTGGCTTCTAGGACTAAAGTAATGATTGAAAGGGATAGTTGG  
GGGTGCTAGTATTTAACGGTCAGCGGTGAAATGCGTGGACCCGTTAAAGACTAACTTATG  
CGAAAGCATTACCAAGGATATTTTCT

>S002c\_01

AGCTCCAATAGCGTATATTAACGTTGTTGCAGTTAAAAGGCTCGTAGTCAATTTATGAT  
TTTGTGGCGCGGTCCTCTGCCTAGCGCAGTGCCTGCGCCGCCATGGATCATCCTTTT  
GGAGAGCATGGCCGCGCTTGATTGCGTGCCTGCGGATTCAAATCATTACTGTGAGTA  
AATCAGAGTGTTTAAAACAGGCTTCACGCTTGTATGTTCTAGCATGGAATAATACGATAG  
GACTTTGGTTCTATTTTGTGGCTTCTAGGACTAAAGTAATGATTGAAAGGGATAGTTGG  
GGGTGCTAGTATTTAACGGTCAGCGGTGAAATGCGTGGACCCGTTAAAGACTAACTTATG  
CGAAAGCATTACCAAGGATATTTTCT

>S002d\_06

AGCTCCAATAGCGTATATTAACGTTGTTGCAGTTAAAAGGCTCGTAGTCAATTTATGAT  
TTTGTGGCGCGGTCCTCTGCCTAGCGCAGTGCCTGCGCCGCCRYGGATCATCCTTTT  
GGAGAACATGGCCGCGCTTYACTGTGTGCGTCAATGGGATTCAAATCATTACTGTGAGTA  
AATCAGAGTGTTTAAAACAGGCTTCACGCTTGTATGTTCTAGCATGGAATAATACGATAG  
GACTTTGGTTCTATTTTGTGGCTTCTAGGACTAAAGTAATGATTGAAAGGGATAGTTGG  
GGGTGCTAGTATTTAACGGTCAGCGGTGAAATGCGTGGACCCGTTAAAGACTAACTTATG  
CGAAAGCATTACCAAGGATATTTTCT

>S003\_01

AGCTCCAATAGCGTATATTAACGTTGTTGCAGTTAAAAGGCTCGTAGTCAATTTATGAT  
CTTGTGTATTTTTTTCTGTGCCAAGCGCACTGCAACAAAAAATCTACGGGTCATCCTTCT  
AGACAATACTCCTGCACCTTGATTGTGTGGGTTGTGGGATCTAGATCATTTACTGTGAGTA  
AATCAGAGTGTTTAAGCAGGCTTCACGCCTGAATGTTCTAGCATGGAATAATAAGATAG  
GACTTTGGTTCTATTTTGTGGCTTCTAGGACTAAAGTAATGATTGATAGGGATAGTTGG  
GGGTGCTAGTATTTAATGGTCAGCGGTGAAATGCGTGGACCCATTAAAGACTAACTTATG  
CGAAAGCATTACCAAGGATATTTTCT

>S004\_02

AGCACTAATAGCGTATACTAACGTTGTTGCAGTTAAAAGGCTCGTAGTCAATTTTTGAT  
CTTGTGGATTGCAGGGCCTGCCTAGCGCAGCGCTTGTGTGTCTACGGGTCATCCTTCT  
GGACTCTGCGCATGCACCTTACTGTGTGTGCTACGATCCAGATCATTTACTGTGAGTA  
AATCAGAGTGTTTAAGCAGGCTTGATGCCTGGATGTTTTAGCATGGAATAATAAGATAG  
GACTTTGGTTCTATTTTGTGGCTTCTAGGACTAGAGTAATGATTGATAGGGATAGTTGG  
GGGTGCTAGTATTTAACGGTCAGCGGTGAAATGCGTGGACCCGTTAAAGACTAACTTATG  
CGAAAGCATTACCAAGGATATTTTCT

>S005\_01

AGCATCAATAGCGTATACTAACGTTGTTGCAGTTAAAAGGCTCGTAGTCTAATTTATGAT  
CTTGTATGATAAGGTTACTGCCAAGCGCAGTACAACCTTTATTCATATAGGTCATCCTTCT  
GGACTCTACCTCGATACTTACTGTATCAAGTGATGATTAGATCATTTACTGTGAGTA  
AATCAGAGTGTTTAAGCAGGCTATATGCCTGAATGTTCTAGCATGGAATAATAAGATAG  
GGCTTTGGTTCTATTTTGTGGCTTCTAGGACTAAAGTAATGATTGATAGGGATAGTTGG  
GGGTGCTAGTATTTAATGGTCAGCGGTGAAATGCGTGGACCCATTAAAGACTAACTTATG  
CGAAAGCATTACCAAGGATATTTTCT

>S006\_01

AGCTCCGATAGCGTATACTAACGTTGTTGCAGTTAAAAGGCTCGTAGTCAACTTATGAT  
CTTGTGCACAAAGCCCTCCGCCAAGCGCGGTGCGTGTCTGTGCACGGGTCATCCTTCT  
GGAGGAATCAGCTGCACCTTGATTGTGTGGCTGTGGAATCCAGATCATTTACTGTGAGTA

AATCAGAGTGTTTAAAGCAGGCTTGATGCCTGAATGTTCTAGCATGGAATAATAAGATAG  
GACTTTGGTTCTATTTTGTGGCTTCTAGGACTAAAGTAATGATTGATAGGGACAGTTGG  
GGGTGCTAGTATTTAACGGTCAGCGGTGAAATGCGTGGACCCGTTAAAGACTAACTTATG  
CGAAAGCATTACCAAGGATATCTTCT

>S007\_07

AGCTCCAATAGCGTATATTAACGTTGTTGCAGTTAAAAGGCTCGTAGTCGAACCTATGAT  
CTTATAGATTGAAACCTTCACCAAGCGTGATGTGTGTTTAACTTCTATTGGTCATCCTTCT  
GGAAAATGCCCTGCACTTAATTGTGTGGTACGTAGAGTCCAGATCATTTACTGTGAGTA  
AATCAGAGTGTTTAAAGCAGGCTTTATGCCTGAATGTTCTAGCATGGAATAATAAGATAG  
GACTTTGGTTCTATTTTGTGGCTTCTAGGACTAAAGTAATGATTGATAGGGATAGTTGG  
GGGTGCTAGTATTTAACGGTCAGCGGTGAAATGCGTGGACCCGTTAAAGACTAACTTATG  
CGAAAGCATTACCAAGGATATTTTCT

>S008\_07

AGCGTCAATAGCGTATACTAATAATGTTGCAGTTAAAAGGCTCGTAGTCGAACYTAAGAT  
CTTGTGTTGCCGTTCCYGCACCAAGCGTGTGGTGTTCGGCGTGCACAGGTCCTCCTTCT  
GGAAGTGCCCTGCACTTGATTGTGTGGGTGGTGGCTCCAGATCCTTTACTGTGAGTAA  
ATCAGAGTGTTCGAAGCAGGCTGCACGCTGAATGTTCTAGCATGGAATAATAAGATAGG  
GCTTTGGTTCTATTTTGTGGCTTCTAGGACTAAAGTAATGATTGATAGGGATAGTTGGG  
GGTGTAGTATTTAACGGTCAGCGGTGAAATGCGTGGACCCGTTAAAGACTAACTTATGC  
GAAAGCATTACCAAGGATATTTTCT

>S009\_01

AGCTCTAATAGCGTATATTAACGTTGTTGCAGTTAAAAGGCTCGTAGTCGAACCTATGAT  
CTAGTGCATGCAACCCACTGCCAAGCGTAGTGCCTGTCCAAGTGCCTGCTCCTTCT  
GGAATAATGCACCTGCACCTTGATTGTGTGGCTGTACAATCCAGATCATTTACTGTGAGTA  
AATCAGAGTGTTTAAAGCAGGCTTCACGCTGAATGTTCTAGCATGGAATAATAAGATAG  
GACTTTGGTTCTATTTTGTGGCTTCTAGGACTAAAGTAATGATTGATAGGGATAGTTGG  
GGGTGCTAGTATTTAACGGTCAGCGGTGAAATGCGTGGACCCACTGAAGACTAACTTATG  
CGAAAGCATTACCAAGGATATTTTCT

>S010\_03

AGCGCTAATAGCGTATATTAATGTTGTTGCAGTTAAAAGGCTCGTAGTCGAATTTATGAT  
CTTGTGACAGGAACCTCGGCCAAGCGTGCCTGCTATGTTATCAGGTCATCCTTCT  
GGGGAATGTGCGTGCCTTGATTGTGTGTGATTAGGATCCAGATCATTTACTGTGAGTA  
AATCAGAGTGTTTAAAGCAGGCTTAATGCCTGAATGTTCTAGCATGGAATAATAATATAG  
GACTTTGGTTCTATTTTGTGGCTTCTAGGACTAAAGTAATGATTGATAGGGATAGTTGG  
GGGTGCTAGTATTTAACGGTCAGCGGTGAAATGCTTAGACCCATTTAAGACAACTTATG  
CGAAAGCATTACCAAGGATATTTTCT

>S011\_01

AGTTCCAATAGCGTATACTTACTTTGTTGCAGTTAAAAGGCTCGTAGTCGAACCTTCTGAT  
CTTGTAGACTGCGCCACTACCAAGCGTAGTGCCTGCTGCTACTGGTCATCCTTCT  
GGGGAATGTGCGTGCCTTCTACTGAGTGGGTTACAGGATCCAGGTCATTTACTGTGAGTA  
AATCAGAGTGTTTAAAGCAGGCTTTATGCCTGAATGTTCTAGCATGGAATAATAAGATAG  
GGCTTTGGTTCTATTTTGTGGCTTCTAGGACTAAAGTAATGATTGATAGGGATAGTTGG  
GGGTGCTAGTATTTAACGGTCAGCGGTGAAATGCGTGGACCCGTTAAAGACTAACTTATG  
CGAAAGCATTACCAAGGATATTTTCT

>S012a\_01

AGCTCCAATAGCGTATATTAACGTTGTTGCAGTTAAAAGGCTCGTAGTCGAACCTATGAT  
CTTGTAACCTTCACCCTTTGCCAAGCGCAATGGTGTGTTTACTGGTCATCCTTCTG  
GAAAATATACCTGTTCTTAACTGAGTGGGCTATACGATCCAGATCATTTACTGTGAGTAA  
ATCAGAGTGTTTAAAGCAGGCTTCATGCCTGAATGTTCTAGCATGGAATAATAAGATAGG  
ACTTTGGTTCTATTTTGTGGCTTCTAGGACTAAAGTAATGATTGATAGGGATAGTTGGG  
GGTGTAGTATTTAACGGTCAGCGGTGAAATGCGTGGACCCGTTAAAGACTAACTTATGC  
GAAAGCATTACCAAGGATATTTTCT

>S012b\_02

AGCTCCAATAGCGTATATTAACGTTGTTGCAGTTAAAAGGCTCGTAGTCGAACCTATGAT  
CTTGTAAGCCGTACCCTTTGCCAAGCGCAATGGTGTATGTGTTACTGGTCATCCTTCTG  
GAACTATACCTGTTCTTCACTGAATGGGCTATACAATCCAGATCATTTACTGTGAGTAA  
ATCAGAGTGTTTAAAGCAGGCTTCATGCCTGAATGTTCTAGCATGGAATAATAAGATAGG  
ACTTTGGTTCTATTTTGTGGCTTCTAGGACTAAAGTAATGATTGATAGGGATAGTTGGG  
GGTGTAGTATTTAACGGTCAGCGGTGAAATGCGTGGACCCGTTAAAGACTAACTTATGC  
GAAAGCATTACCAAGGATATTTTCT

>S012c\_08

AGCTCCAATAGCGTATATTAACGTTGTTGCAGTTAAAAGGCTCGTAGTCGAACCTATGAT  
CTTGTAACCTATAACGTTTCCCAAGCGCAATCGTGTCTATGTTACGGGTCATCCTTCTG  
GAAAATATACCTGTTCTTAACTGAGTGGGCTATACGATCCAGATCATTTACTGTGAGTAA

ATCAGAGTGTTTAAAGCAGGCTTTATGCCTGAATGTTCTAGCATGGAATAATAAGATAGG  
ACTTTAGTTCATTTTTGTTGGCTTCTAGGACTGAAGTAATGATTGATAGGGATAGTTGGG  
GGTGCTAGTATTTAACGGTCAGCGGTGAAATGCGTGGACCCGTTAAAGACTAACTTATGC  
GAAAGCATTACCAAGGATATTTTCA

>S012d\_87

AGCTCCAAATAGCGTATATTAACGTTGTTGCAGTTAAAAGGCTCGTAGTCAACCTATGAT  
CTTGTAACCTATAACCCTTTGCCAAGCGCAATGGTGTTCAGTTACTGGTCATCCTTCTG  
GAAAATATACCTGCTCTTCACTGAGTGGGCTATACGATCCAGATCATTACTGTGAGTAA  
ATCAGAGTGTTTAAAGCAGGCTTCAATGCCTGAATGTTCTAGCATGGAATAATAAGATAGG  
ACTTTGGTTCATTTTTGTTGGCTTCTAGGACTAAAGTAATGATTGATAGGGATAGTTGGG  
GGTGCTAGTATTTAACGGTCAGCGGTGAAATGCGTGGACCCGTTAAAGACTAACTTATGC  
GAAAGCATTACCAAGGATATTTTCT

>Y001\_01

AGCTCCAAAAGCATATATTAACGTTGTTGCAGTTAAAAGGCTCGTAGTCAAACATATGAA  
CCTAGCGGTCTGGTCAAGTGTCTAGTACACTTAGAGCTGGAATCGCTGGATCTTTCTGCT  
GAATCGCATTTCTGCTCTTGATTGAGTTGGTTTTGTAATGCAGACAATTTACTGTGAATA  
AATCAAAGTGTTCAAAGCATGCTTTTATGTAATGCTCTAGCATGGAATAATACTAT  
AAGACTTCGGTTTATCGATTGGGCTGTAAGACTTAAGTAATGATTGATAGGGATAGTTGG  
GGGTGCTAGTATTTAACGGCAAGCGGTGAAATGCATAGACCCGTTAAAGACTATCTAATG  
CGAAAGCATTACCAAGGATATCTTCT

>Y002\_02

AGCTCCAAAAGCGTATATTAACGTTGTTGCAGTTAAAAGGCTCGTAGTCAACCTTATGAC  
CTTTAGTTCATGCCCATTGCTTAGTACGTTTAGTGCATGTAATTGTCAGTCATCCATCT  
GATAGCACTCTGCTCTTGATTGAGTTGGTTGTGTAGTACAGATCTTTACTGTGAGTA  
AATCAGAGTGTTCAAAGCAGGCATATTTGCTATGAATGCTTAGCATGGAATAATACTAT  
AGGACTTCGGTTTTATTTATTTGGCTTCAAGACTTAAGTAATGATTGATAGGGATAGTTGG  
GGGTGCTAGTATTTAACGGTCAGCGGTGAAATGCACAGACCCGTTAAAGACTATCTTATG  
CGAAAGCATTACCAAGGATATCTTCT

>O001\_01

AGCTCCAATAGCGTATATTAACCTTTGTTGCAGTTAAAAGGCTCGTAGTCAAAATTTATGGC  
CCAGTGCAGTGGCCCGTTGTCAAGTACATCGAGTGCCGTGCGCACGGGTATCCTGATG  
GAAAAGCACTTCTACCTTTGATTGGGTTGGTTCGCTGTGATCCATCTCGTTTACCGTGAGT  
AAATCAAATGTTCAAAGCAAGCTGAGACGCTTGAATGCTTAGCATGGAATAATAATAT  
AGGACTTGGTTCATTTTGGCTTTCTGAACCAAAGTAATGATCGATAGGGATGGT  
GGGGGTGCTTGTATTATTCGGTCAGCGGTGAAATGCGTAGACCCGTTAAAGACTATCTTATG  
TGCGAAAGCATTACCAAGTACATCTTCT

>O002\_03

AGCTCCAATAGCGTATATTAACCTTTGTTGCAGTTAAAAGGCTCGTAGTCAAAATTTGTTGGC  
CTTGTGAGCGTAGCCCACCGTCTAGTATGTGTGAGTGTGCGCTAACAGGTCATCCTTCT  
TGAAAAGCACTTCTTACTTTATTTGTCGGTTGCTGTAATCCAGATCATTACTGTGAGT  
AAATCAGAGTGTTCAAAGCAGGCTTGTGAAGCTTGTATGCTCCAGCATGGAATAATAAGA  
TAGGACTTGGTTTTATTTTATTTGGCTTCTAGAAGTGAAGTAATGATCGATAGGGATAGT  
TGGGGGTGCTAGTATTTAACGGTCAGCGGTGAAATGCGTAGACCCGTTAAAGACTAACTT  
ATGCGAAAGCATTACCAAGGATATCTTCT

>O003\_12

AGCTCCAGTAGCGTATGCTAACGTTGTTGCAGTTAAAAGGCTCGTAGTCAAAATATGTGGC  
TTTGCGCGCGCGCCGACCATCGTGTATGGTGTGAGTGTGTTGTCGCTGCGAGTCATCCTTCT  
GGAGAGCGCCTCTGTCCTTGATTGGTTCGGTTGCCGCAATCTAGATCACTTACTGTGAGTA  
AATCAAAGTGTTCAAAGCAGGCTTGTGAAGCTTGTATGCTCTAGCATGGAATAACAATA  
AGGACTCTGGTTCATTTTGTGGCTTTCGGAACGAGAGTAATGATTGATAGGGATAGTT  
GGGGGTGCTAGTATTTAACGGTCAGCGGTGAAATGCTCAGACCCGTTCAAGACTAACTTA  
TGCGAAAGCATTACCAAGGATATCTTCT

>O004\_01

AGCTCCAATAGCGTATATTAACCTTTGTTGCAGTTAAAAGGCTCGTAGTCAAAATTTATGGC  
TTTGTAGGCTGGCCCGTTGTCAAGTACATCGAGTGCCGCGCCTACTAGTCATCCTTCT  
GGAAAGCACTTCTACCTTTGATTGGGTTGGTTCGTTGTAATCCAGATCATTACTGTGAGT  
AAATCAAAGTGTTCAAAGCAGGCTTGTGAAGCTTGTATGCTCTAGCATGGAATAATAAGA  
TAGGACTTGGGTTCTATTTTGTGGCTTCTAGAACCAAAGTAATGATCGATAGGGATAGT  
TGGGGGTGCTAGTATTTAACGGTCAGCGGTGAAATGCTCAGACCCGTTAAAGACTAACTT  
ATGCGAAAGCATTACCAAGGATATCTTCT

>O005\_01

AGCTCCAGTAGCGTATATTAACCTTTGTTGCAGTTAAAAGGCTCGTAGTCAAAATTTATGGC  
TTTGTTTTTGTGATCGGTTGTCATTGACAATGAGTTTCGCAATTAAGTACTAGTCATCCTTCTG  
GAAAGCACTGCTGCCCTTGATTGGGTTGGTGTGTAATCCAGATCATTACTGTGAGTA

AATCAAAGTGTTCAAAGCAGGCTTGTGAAGCCTGTATGCTCCAGCATGGAATAATAAGAT  
AGGACTTGGGTTCTATTTTGTGGCTTCTAGAATCTAAGTAATGATCGATAGGGATAGTT  
GGGGGTGCTAGTATTTAACGGTCAGCGGTGAAATGCTCAGACCCGTTAAAGACTAECTTA  
TGCGAAAGCATTACCAAGGATATCTTCT

>0006\_34

AGCTCCAATAGCGTATATTAATTTTGTGTCAGTTAAAAGGCTCGTAGTTCGAATTTATGGC  
TTTGCAGCCCTGTCCCRITATCAAGTATAATGAGTGACGGTGGTTACTGGTCATCCTTCT  
GGAAAGCACTTCTGACCTTCACTGGTTCGGTTGTTGTAATCCAGATCATTTACTGTGAGT  
AAATCAAAGTGTTCAAAGCAGGCTTGTGAAGCTTGTATGCTCTAGCATGGAATAATAAGA  
TAGGACTTGGGTTCTATTTTGTGGCTTTCAGAACCAAAGTAATGATCGATAGGGATAGT  
TGGGGGTGCTAGTATTTAACGGTCAGCGGTGAAATGCTCAGACCCGTTAAAGACTAECTT  
ATGCGAAAGCATTACCAAGGATATCTTCT

>0007\_03

AGCTCCAATAGCGTATATTAACTTTGTGTCAGTTAAAAGGCTCGTAGTTCGAATTTATGGC  
TTTGCTTTCCCTGGCCCTTATCTTGAATAATGAGTGCCGGTGATTGCTAGTCATCCTTCT  
GGAAAGCTCCTCTGCCCTTGATTGGTGTGGTGGTAGTAATCCAGATCATTTACTGTGAGT  
AAATCAAAGTGTTCACGCAGGCTTGTGAAGCTTGTATGCTCTAGCATGGAATAATAAGA  
TAGGACTTGGGTTCTATTTTGTGGCTTTCAGGACCAAAGTAATGATCGATAGGGATAGT  
TGGGGGTGCTAGTATTTAACGGTCAGCGGTGAAATGCTCAGACCCGTTAAAGACTAECTT  
ATGCGAAAGCATTACCAAGGATATCTTCT

>0008\_01

AGCTCCAATAGCGTATATTAACTTTGTGTCAGTTAAAAGGCTCGTAGTTCGAATTTATGGC  
TCTGCAATCCTAGCCCACTATCTTGAATAGCGAGTGCCGGTGATTGCAAGTCATCCTTCT  
GGAAAGCACTTCTGCCCTTGATTGGTGTGGTGGTAGTAATCCAGATCATTTACTGTGAGT  
AAATCAAAGTGTTCAAAGCAGGCTTGTGAAGCTTGTATGCTCTAGCATGGAATAATAAGA  
TAGGACTTGGGTTCTATTTTGTGGCTTTCAGAACCAAAGTAATGATCGATAGGGATAGT  
TGGGGGTGCTAGTATTTAACGGTCAGCGGTGAAATGCTCAGACCCGTTAAAGACTAECTT  
ATGCGAAAGCATTACCAAGGATATCTTCT

>0009a\_02

AGCTCCAATAGCGTATATTAACTTTGTGTCAGTTAAAAGGCTCGTAGTTCGAATTTATGGC  
TTTGCAATCCCGACCCACTATCTTGAATAGTGAGTGTGGTGATAGCTAGTCATCCTTCT  
GGAAAGCACTTCTGCCCTTCACTGGTGCAGGTTGTTGTAATCCAGATCATTTACTGTGAGT  
AAATCAAAGTGTTCAAAGCAGGCTTGTGAAGCTTGTATGCTCTAGCATGGAATAATAAGA  
TAGGACTTGGGTTCTATTTTGTGGCTTTCAGAACCAAAGTAATGATCGATAGGGATAGT  
TGGGGGTGCTAGTATTTAACGGTCAGCGGTGAAATGCTCAGACCCGTTAAAGACTAECTT  
ATGCGAAAGCATTACCAAGGATATCTTCT

>0009b\_03

AGCTCCAATAGCGTATATTAACTTTGTGTCAGTTAAAAGGCTCGTAGTTCGAATTTATGGC  
TTTGTTATCCCGACCCACTATCTTGAATAGTGAGTGTGGTGATAGCAAGTCATCCTTCT  
GGAAAGCACTTCTGCCCTTCACTGGTGCAGGTTGCTGTAATCCAGATCATTTACTGTGAGT  
AAATCAAAGTGTTCAAAGCAGGCTTGTGAAGCTTGTATGCTCTAGCATGGAATAATAAGA  
TAGGACTTGGGTTCTATTTTGTGGCTTTCAGAACCAAAGTAATGATCGATAGGGATAGT  
TGGGGGTGCTAGTATTTAACGGTCAGCGGTGAAATGCTCAGACCCGTTAAAGACTAECTT  
ATGCGAAAGCATTACCAAGGATATCTTCT

>0009c\_02

AGCTCCAATAGCGTATATTAACTTTGTGTCAGTTAAAAGGCTCGTAGTTCGAATTTATGGC  
TTTGCTTTCCCTGACCCACTATCTTGAATAGTGAGTGTCCGGTGATTGCTAGTCATCCTTCT  
GGAAAGCACTTCTGCCCTTCACTGGTGTGGTTCGTTGTAATCCAGATCATTTACTGTGAGT  
AAATCAAAGTGTTCAAAGCAGGCTTGTGAAGCTTGTATGCTCTAGCATGGAATAATAAGA  
TAGGACTTGGGTTCTATTTTGTGGCTTTCAGAACCAAAGTAATGATCGATAGGGATAGT  
TGGGGGTGCTAGTATTTAACGGTCAGCGGTGAAATGCTCAGACCCGTTAAAGACTAECTT  
ATGCGAAAGCATTACCAAGGATATCTTCT

>0009d\_12

AGCTCCAATAGCGTATATTAACTTTGTGTCAGTTAAAAGGCTCGTAGTTCGAATTTATGGC  
TTTGCCTCTGACCCACTGTCTTGAATAGTGAGCGTTGGTGAATGCTAGTCATCCTTCT  
GGAAAGCACTTCTGCCCTTCACTGGTGTGGTTCGTTGTAATCCAGATCATTTACTGTGAGT  
AAATCAAAGTGTTCAAAGCAGGCTTGTGAAGCTTGTATGCTCTAGCATGGAATAATAAGA  
TAGGACTTGGGTTCTATTTTGTGGCTTTCAGAACCAAAGTAATGATCGATAGGGATAGT  
TGGGGGTGCTAGTATTTAACGGTCAGCGGTGAAATGCTCAGACCCGTTAAAGACTAECTT  
ATGCGAAAGCATTACCAAGGATATCTTCT

>0009e\_06

AGCTCCAATAGCGTATATTAACTTTGTGTCAGTTAAAAGGCTCGTAGTTCGAATTTATGGC  
TTTGCAATCCTGACCCACTATCTTGTATAGTGAGCGTCCGGTGATAGCTAGTCATCCTTCT  
GGAAAGCACTTCTGCCCTTCACTGGTGCAGGTTGTTGTAATCCAGATCATTTACTGTGAGT

AAATCAAAGTGTTCAAAGCAGGCTTGTGAAGCTTGTATGCTCTAGCATGGAATAATAAGA  
TAGGACTTGGGTTCTATTTTGTGGCTTTCAGAACCAAAGTAATGATCTATAGGGATAGT  
TGGGGGTGCTAGTATTTAACGGTCAGCGGTGAAATGCTCAGACCCGTTAAAGACTAACTT  
ATGCGAAAGCATTACCAAGGATATCTTCT

>0010\_01

AGCTCCAATAGCGTATATTAACCTTTGTTCAGTTAAAAGGCTCGTAGTCAATTTATGGC  
ATGTATTACTTAATCCACCGCAAGTCTGGTGAGCATTAAATTAATCATGTCATCCTTTT  
AGAAAGTTTTTCTGGCATTGATTTGTTCGGTTATAATAATCTAAATCATTTACTGTGAGTA  
AATCAAAGTGTTCAAAGCAGGCTTGTGAAGCTTGTATGCTCTAGCATGGAATAATAATAT  
AGGACTTGGTTTCTATTTTATTGGCTTTCAGATACCAAGTAATGATCGATAGGGATAGTT  
GGGGGTGCTAGTATTTAACGGTCAGCGGTGAAATGCTCAGACCCGTTAAAGACTAACTTA  
TGCGAAAGCATTACCAAGGATATCTTCT

>0011\_01

AGCTCCAATAGCGTATATTAACCTTTGTTCAGTTAAAAGGCTCGTAGTCAATTTATGGC  
TTTGTAGCTCTGGCCACCATCAAGTATGGTGAGTGCCGGTGGCTACTGGTCATCCTTCT  
GGAAAGCACTTCTGCCCTTGATTGGGTTGGTTGTTGTAATCCAGATCATTTACTGTGAGT  
AAATCAAAGTGTTCAAAGCAGGCTTGTGAAGCTTGTATGCTCTAGCATGGAATAATAAGA  
TAGGACTTGGGTTCTATTTTGTGGCTTTCAGATACCAAGTAATGATCGATAGGGATAGT  
TGGGGGTGCTAGTATTTAACGGTCAGCGGTGAAATGCTCAGACCCGTTAAAGACTAACTT  
ATGCGAAAGCATTACCAAGGATATCTTCT

>0012\_04

AGCTCCAATAGTGTATATTAACCTTTGTTCAGTTAAAAGGCTCGTAGTCAATTTATGGC  
TTTGTGGTCTTGGCCACCATCAAGTATGGTGAGAGTCGAGGCTACTGGTCATCCTTCTG  
GAAAGCACTTCTGCCCTTGATTGGGTCGGTTCGTCACAATCCAGATCATTTACTGTGAGTA  
AATCAGAGTGTTCAAAGCAGGCTTGTGAAGCTTGTATGCTCCAGCATGGAATAATAAGAT  
AGGACTTGGGTTCTATTTTGTGGCTTTCAGAACCAAAGTAATGATCGATAGGGATAGTT  
GGGGGTGCTAGTATTTAACGGTCAGCGGTGAAATGCTCAGACCCGTTAAAGACTAACTTA  
TGCGAAAGCATTACCAAGGATATCTTCT

>0013\_02

AGCTCCAATAGCGTATATTAACCTTTGTTCAGTTAAAAGGCTCGTAGTCAATTTATGGC  
TTTGTTTTAAACGGTCCACCATCAAGTATGGTGAGCACTGGTAAAACCTAGTCATCCTTCTG  
GAAAGCACTTCTGCCCTTGATTGGCTCGGTTGTTGTAATCCAGATCATTTACTGTGAGTA  
AATCAAAGTGTTCAAAGCAGGCTTGTGAAGCTTGTATGCTCTAGCATGGAATAATAAGAT  
AGGACTTGGGTTCTATTTTGTGGCTTTCAGAACCAAAGTAATGATCGATAGGGATAGTT  
GGGGGTGCTAGTATTTAACGGTCAGCGGTGAAATGCTCAGACCCGTTAAAGACTAACTTA  
TGCGAAAGCATTACCAAGGATATCTTCT

>0014\_09

AGCTCCAATAGCGTATATTAACCTTTGTTCAGTTAAAAGGCTCGTAGTCAATTTATGGC  
TTTGTTTTCCCGGTCCACCATCAAGTATGGTGAGCACTGGGAGATTACTAGTCATCCTTCT  
GGAAAGCACTTCTRCCCTTGATTGGGTYGGTCGTTGTAATCCAGATCATTTACTGTGAGT  
AAATCAAAGTGTTCAAAGCAGGCTTGTGAAGCTTGTATGCTCTAGCATGGAATAATAAGA  
TAGGACTTGGGTTCTATTTTGTGGCTTTCAGAACCAAAGTAATGATCGATAGGGATAGT  
TGGGGGTGCTAGTATTTAACGGTCAGCGGTGAAATGCTCAGACCCGTTAAAGACTAACTT  
ATGCGAAAGCATTACCAAGGATATCTTCT

>0015\_03

AGCTCCAATAGCGTATATTAACCTTTGTTCAGTTAAAAGGCTCGTAGTCAATTTATGGC  
TTTGTGGACTTGGCCCGCTACCAAGTGTGGTGAGTGCTGGCGTGCCTAGTCATCCTTCT  
GGAAAGCACTTCTGCCCTTGATTGGGTTGGTGGTTGTGATCCAGATCATTTACTGTGAGT  
AAATCAAAGTGTTCAAAGCAGGCTTGTGAAGCTTGTATGCTCTAGCATGGAATAATAAGA  
TAGGACTTGGGTTCTATTTTGTGGCTTTCAGAACTAAAGTAATGATCGATAGGGACAGT  
TGGGGGTGCTAGTATTTAACGGTCAGTGGTGAATACGAAGACCCGTTAAAGACTAACTT  
ATGCGAAAGCATTACCAAGGATATCTTCT

>0016\_01

AGCTCCAATAGCGTATATTAACCTTTGTTCAGTTAAAAGGCTCGTAGTCAATTTATGGC  
TTTGTAGACTTGGCCCGCTAGTAAATCTAGTGAGTGCTGGCGTCTACTAGTCATCCTTCT  
GGAAAGCACTTCTACCCTTGATTGGGTTGGTCGTTGTAATCCAGATCATTTACTGTGAGT  
AAATCAAAGTGTTCACGCAGGCTTGTGAAGCTTGTATGCTCTAGCATGGAATAATAAGA  
TAGGACTTGGGTTCTATTTTGTGGCTTTCAGAACCAAAGTAATGATTGATAGGGATAGT  
TGGGGGTGCTAGTATTTAATGGTCAGCGGTGAAATGCGGAGACCCCTTAAAGACTAACTT  
ATGCGAAAGCATTACCAAGGATATCTTCT

>0017\_02

AGCTCCAATAGCGTATATTAACCTTTGTTCAGTTAAAAGGCTCGTAGTCAATTTATGGC  
TTTGTAAACYTGGCCCRCTAGCAAGCTAGTGAGTGCTGATGTTACTAGTCATCCTTCT  
GGAAAGCACTTCTTCCCTTGATTGGGTTGGTCGTTGTGATCCAGATCATTTACTGTGAGT

AAATCAAAGTGTTCAAAGCAGGCTTGTGAAGCTTGTATGCTCTAGCATGGAATAATAAGA  
TAGGACTTGGGTTCTATTTTGTGGCTTTTGAACCAAAGTAATGATTGATAGGGATAGT  
TGGGGGTGCTAGTATTTAACGGTCAGCGGTGAAATGCTCAGACCCGTTAAAGACTAACTT  
ATGCGAAAGCATTACCAAGGATATCTTCT

>0018\_02

AGCTCCAATAGCGTATATTAACCTTTGTTCAGTTAAAAGGCTCGTAGTCAATTTATGGC  
TTTGTGGTCTGGCCCACTGCCAAGTGCAGTGAGTGCTGGTGTCCACTGGTCATCCTTCT  
GGAAAGCACTTCTGGCCTTGATTGGTTCGGTTGTTGTAATCCAGATCATTTACTGTGAGT  
AAATCAAAGTGTTCAAAGCAGGCTTGTGAAGCTTGTATGCTCTAGCATGGAATAATAAGA  
TAGGACTTGGGTTCTATTTTGTGGCTTTCGGAACCAAAGTAATGATTGATAGGGATAGT  
TGGGGGTGCTGGTATTTAACGGTCAGCGGTGAAATGCTCAGACCCGTTAAAGACTAACTT  
ATGCGAAAGCATTACCAAGGATATCTTCT

>0019\_03

AGCTCCAATAGCGTATATTAACCTTTGTTCAGTTAAAAGGCTCGTAGTCAATTTATGGC  
TTTGTGGTCTGGCCCACTAGCAAGTCTAGTGAGCGCCGGTGTCCACTGGTCATCCTTCT  
GGAAAGCACTTCTGACATTGATTGTTTGGTTGCTGCAATCCAGATCATTTACTGTGAGT  
AAATCAAAGTGTTCAAAGCAGGCTTGTGAAGCTTGTATGCTCTAGCATGGAATAATAAGA  
TAGGACTTGGGTTCTATTTTGTGGCTTTCAGAATCAAAGTAATGATCGATAGGGATAGT  
TGGGGGTGCTAGTATTTAATGGTCAGCGGTGAAATGCTCAGACCCCTTAAAGACTAACTT  
ATGCGAAAGCATTACCAAGGATATCTTCT

>0020\_02

AGCTCCAATAGCGTATATTAACCTTTGTTCAGTTAAAAGGCTCGTAGTCAATTTATGGC  
TGTGTAGACTGGACCATTGCCAAGTGAATGAGTGCCCGGCTACTGGTCATCCTTCT  
GGAAAGCACTTCTGACCTTGATTGGTTCGGTTGTTGTAATCCAGATCATTTACTGTGAGT  
AAATCAAAGTGTTCAAAGCAGGCTTGTGAAGCTTGTATGCTCTAGCATGGAATAATAAGA  
TAGGACTTAGGTTCTATTTTGTGGCTTTCAGAATCAAAGTAATGATCGATAGGGATAGT  
TGGGGGTGCTAGTATTTAATGGTCAGCGGTGAAATGCATAGACCCCTTAAAGACTAACTT  
ATGCGAAAGCATTACCAAGGATATCTTCT

>0021\_01

AGCTCCAATAGCGTATATTAACCTTTGTTCAGTTAAAAGGCTCGTAGTCAATTTATGGC  
TTTGTAGTCTTAGCCCGTCACACTGTGATGAGAGCTGGTGTCTACTAGTCATCCTTCTGG  
AAAGCACTTCTGACCTTGATTGGTTCGGTTGCTGTAATCCAGATCATTTACTGTGAGTAA  
ATCAAAGTGTTCAAAGCAGGCTTGTGAAGCTTGTATGCTCTAGCATGGAATAATAAGATA  
GGACTTGGGTTCTATTTTGTGGCTTTCAGAATCAAAGTAATGATCGATAGGGATAGTTG  
GGGGTCTAGTATTTAATGGTCAGCGGTGAAATGCACAGACCCCTTAAAGACTAACTTAT  
GCGAAAGCATTACCAAGGATATCTTCT

>0022\_03

AGCTCCAATAGCGTATATTAACCTTTGTTCAGTTAAAAGGCTCGTAGTCAATTTATGTC  
TATGTTGTCTTAGCCCATGGCCATGAGTGCAGTGTGGTGTCAACTAGTCATCCTTCT  
GGAAAGTACTTCTGGCCTTGATTGGTTCGGTTGCTACAATCCAGATCATTTACTGTGAGT  
AAATCAAAGTGTTCAAAGCAGGCTTGTGAAGCTTGTATGCTCTAGCATGGAATAATAAGA  
TAGGACTTGGGTTCTATTTTGTGGCTTTCAGAATCAAAGTAATGATCGATAGGGATAGT  
TGGGGGTGCTAGTATTTAATGGTCAGCGGTGAAATGCTCAGACCCCTTAAAGACTAACTT  
ATGCGAAAGCATTACCAAGGATATCTTCT

>0023\_160

AGCTCCAATAGCGTATATTAACCTTTGTTCAGTTAAAAGGCTCGTAGTCAATTTATGGC  
TTTGTAAACCTGGTCCACTGCCAAGTGTAGTGAGTACTGGTGGTACTGGTCATCCTTCT  
GGAAAGCACTTCTGACCTTCACTGGTATGGTTGTTGCAATCCAGATCATTTACTGTGAGT  
AAATCAAAGTGTTCACGCAGGCTTGTGAAGCTTGTATGCTCTAGCATGGAATAATAAGA  
TAGGACTTGGGTTCTATTTTGTGGCTTTCAGAACCAAAGTAATGATCGATAGGGATAGT  
TGGGGGTGCTAGTATTTAACGGTCAGCGGTGAAATGCTCAGACCCGTTAAAGACTAACTT  
ATGCGAAAGCATTACCAAGGATATCTTCT

>0024a\_13

AGCTCCAATAGCGTATATTAACCTTTGTTCAGTTAAAAGGCTCGTAGTCAATTTATGGC  
TTTGTGGTCTGGCCCACTGCCAAGTGTAGTGAGTGCCGGAGGCCACTGGTCATCCTTCT  
GGAAAGCACTTCTGACCTTCACTGGTACGGTTGYTGCAATCCAGATCATTTACTGTGAGT  
AAATCAAAGTGTTCACGCAGGCTTGTGAAGCTTGTATGCTCTAGCATGGAATAATAAGA  
TAGGACTTGGGTTCTATTTTGTGGCTTTCAGAACCAAAGTAATGATCGATAGGGATAGT  
TGGGGGTGCTAGTATTTAACGGTCAGCGGTGAAATGCTCAGACCCGTTAAAGACTAACTT  
ATGCGAAAGCATTACCAAGGATATCTTCT

>0024b\_351

AGCTCCAATAGCGTATATTAACCTTTGTTCAGTTAAAAGGCTCGTAGTCAATTTATGGC  
TTTGTGGTCTGGCCCACTGCCAAGTGTAGTGAGTGCCGGTGTCCACTGGTCATCCTTCT  
GGAAAGCACTTCTGACCTTCACTGGTACGRTTGTGCAATCCAGATCATTTACTGTGAGT



AAATCAAAGTGTTC AACGCAGGCTTGTGAAGCTTGTATGCTCTAGCATGGAATAATAAGA  
TAGGACTTGGGTTCTATTTTGTGGCTTTTCAGAACCAAAGTAATGATCGATAGGGATAGT  
TGGGGGTGCTAGTATTTAACGGTCAGCGGTGAAATGCTCAGACCCGTTAAAGACTAACTT  
ATGCCAAAGCATTACCAAGGATATCTTCT

>N001\_01

AGCTCCAATAGCGTATTCTAACGTTGCTGCAGTTAAAAGGCTCGTAGTCGAACCTATGGC  
TTTTGCAGGCCTGGCCCCGTGCCAAGTTGCACGCGTGTGGCCGGTGTGGCGAGCCATC  
CTTCTGGAGAGCGCCCCTGCCCTTGATTGGGTGCGGCGGTGCGATCCAGATCCTTTACTG  
TGAGTAAATCAGAGTGTTC AAAGCAGGCTTGCAGCTTGTATGCATTAGCATGGAATAA  
TGAGATAGGACTTGGGTCTCTATTTTGTGGCTTTTTAGGACCAAAGTAATGATTGAAAG  
GGATAGTTGGGGGTGCTAGTATTCAGTGGTCAGCGGTGAAATGCGAGGACCCATTGAAGA  
CTAACTTATGCGAAAGCATTACCAAGGATATCTTCT

>N002\_12

AGCTCCAATAGCGTATTCTAACGTTGCTGCAGTTAAAAGGCTCGTAGTCGAACCTATGGC  
TTTTGCAGGCCTGGCCCCGTGCCAAGTTGCACGCGTGTGGCCGGTGTGGCGAGCCAT  
CCTTCTGGARAGCGCCACTGCCCTTGATTGGGTGGGCGGCGATCCAGATCCTTTACTG  
TGAGTAAATCAGAGTGTTC AAAGCAGGCTTTCGAGCTTGTATGCATTAGCATGGAATAA  
TGAGATAGGACTTTGGATCTTATTTTCGTTGGCTTTTCGGGACCAAAGTAATGATGAAAGG  
GATAGTTGGGGGTGCTAGTATTCAGTGGTCAGCGGTGAAATGCATGGACCCACTGAAGAC  
TGACTCATGCGAAAGCATTACCAAGGATATCTTCT

>N003\_95

AGCTCCAATAGCGTATTCTAACGTTGCTGCAGTTAAAAGGCTCGTAGTCGAACCTATGGC  
TTTTTCGGGCTGGCCCCGTGCCAAGTTGCACGCGTGTGGCCGGTGTGGCGAGCCAT  
CCTTCTGGAGAGCGCCCCTGCCCTTGATTGGGTGCGGCGGCGATCCAGATCCTTTACT  
GTGAGTAAATCAGAGTGTTC AAAGCAGGCTTSCGAGCTTGTATGCATTAGCATGGAATA  
ATGAGATAGGACTTGGGTCTCTATTTTCGTTGGCTTTTCAGGAACCAAAGTAATGATGAAAG  
GGATAGTTGGGGGTGCTAGTATTCAGTGGTCAGCGGTGAAATGCATGGACCCACTGAAGA  
CTAACTCATGCGAAAGCATTACCAAGGATATCTTCT

>Z001\_01

AGCTCCAATAGTGTATATTAACGTTGTTGCAGTTAAAAGGCTCGTAGTCGAACCTGTGGC  
AATGCCAATGAAACCATTGCTACGCGCAGTGGCTTTTCGTGTTGTCTTGCCATCTTTTC  
GGAGAAGGCTTCTTGCTCTTCACTGAGTAGTTGTGTATCCGGATCCTTTACTGTGAGTA  
AATCAAAGTGTTTAAGGCAGGCATGATAGCTGAATGTATTAGCATGGAATAATAAGATA  
GGACTTCTGTTCTATTTTGTGGCTTCTAGAAGTGAAGTAATGATTGAAAGGGATAGTTG  
GGGGTGTAGTATTTAACGGTCAGCGGTGAAATGCTCGGACCCGTTGAAGACTAACTTAT  
GCGAAAGCATTACCAAGGATATTTTCT

>Z002\_01

AGCTCCAATAGTGTATATTAACGTTGTTGCAGTTAAAAGGCTCGTAGTCGAACCTGTGGC  
ATTGACGCTGGATCCAGCGCTTCGCGCACTGGCTTTCTATGTCGTCTTGCCATCTTTCC  
GGGGCGCATTTCTTGCTCTTCACTGAGTGGTTTTGTTATCCGGATCCTTTACTGTGAGTA  
AATCAAAGTGTTTAAGGCAGGCATGATAGCTGAATGTATTAGCATGGAATAATAAGATA  
GGACTTCTGTTCTATTTTGTGGCTTCTAGAAGTGAAGTAATGATTGAAAGGGATAGTTG  
GGGGTGTAGTATTTAACGGTCAGCGGTGAAATGCTCGGACCCGTTGAAGACTAACTTAT  
GCGAAAGCATTACCAAGGATATTTTCT

>Z003\_02

AGCTCCAATAGTGTATATTAACGTTGTTGCAGTTAAAAGGCTCGTAGTCGAACCTGTGAC  
ATTGATGACTTGAACCAGTGTACGCGCATTGGCTTTCTATGTTGTCGTGTCATCTTTCC  
GGGGCGCATTTCTTGCTCTTCACTGAGTGGTTTTGTTATCCGGATCCTTTACTGTGAGTA  
AATCAAAGTGTTTAAGGCAGGCATGATAGCTGAATGTATTAGCATGGAATAATAAGATA  
GGACTTCTGTTCTATTTTGTGGCTTCTAGAAGTGAAGTAATGATTGAAAGGGATAGTTG  
GGGGTGTAGTATTTAACGGTCAGCGGTGAAATGCTCGGACCCGTTGAAGACTAACTTAT  
GCGAAAGCATTACCAAGGATATTTTCT

>Z004\_02

AGCTCCAATAGTGTATATTAACGTTGTTGCAGTTAAAAGGCTCGTAGTCGAACCTGTGGC  
ATTGACGGCTGGATCCATTGCTCCGCGCAGTGGCTTTCCGTGTCGTCTTGCCATCTTTCC  
GGAGCGCATCTCTTGCTCTTACTGAGTGGTTTTGTTATCCGGATCCTTTACTGTGAGTA  
AATCAAAGTGTTTAAGGCAGGCATGATAGCTGAATGTATTAGCATGGAATAATAAGATA  
GGACTTCTGTTCTATTTTGTGGCTTCTAGAAGTGAAGTAATGATTGAAAGGGATAGTTG  
GGGGTGTAGTATTTAACGGTCAGCGGTGAAATGCTCGGACCCGTTGAAGACTAACTTAT  
GCGAAAGCATTACCAAGGATATTTTCT

>Z005\_02

AGCTCCAATAGTGTATATTAACGTTGTTGCAGTTAAAAGGCTCGTAGTCGAACCTGTGGC  
ATTGCCGACTGGAACCTATTGCTCCGCGCAGTGGCTTTCCGTGTCGTCTTGCCATCTTTCC  
GGAGCGCATTTCTTGCTCTTCACTGAGTGGTTTTGTTATCCGGATCCTTTACTGTGAGTA

AATCAAAGTGTTTAAGGCAGGCATGATAGCTTGAATGTATTAGCATGGAATAATAAGATA  
GGACTTCTGTTCTATTTTTGTTGGCTTCTAGAAGTGAAGTAATGATTGAAAGGGATAGTTG  
GGGGTGTAGTATTTAACGGTCAGCGGTGAAATGCTCGGACCCGTTGAAGACTAACTTAT  
GCGAAAGCATTACCAAGGATATTTTCT

>X001\_01

AGCTCCAGTGGCGTATATTAAGTTGTTGCAGTTAAAAGGCTCGTAGTCAATATATGGC  
TTTGTGATTTCTGGCCATTAGCTAGTCTAGTGTAGGCTGTTTTGCAAGTCATCCTTCT  
GGAGAGCACTTCTGGACTTGATTGTCTGGTTGTGTAATCCAGATCATTTACTGTGAGAAA  
AACAAAGTGTCAAAGCAGGCTCTAGAGTGTGTAATGTCTTAGCATGGAATAATAAGAT  
AGGACTTCGGTTTTATTTTTGTTGGCTTCTACAAGTGAAGTAATGATTGATAGGGATAGTT  
GGGGTGTAGTATTTAGTGGTCAGCGGTGAAATGCGAAGACCCACTAAAGACTAACTTA  
TGCGAAAGCATTACCAAGGATATCCTCT

>C001\_02

AGCTCCAATAGCGTATATTAAGTTGTTGCAGTTAAAAGGCTCGTAGTCAATGTATGAT  
TCTGTTGAACCTGGCCACACTCTAGTAGTGTGAGTGTGGCGTTCACGGGTCATCCTTC  
TGGAGAGCACCTCTGCCCTTGATTGGGTTGGTTGTGTAATTCAGATCATTTACTGTGAAC  
AAATCAAAGTGTCAAAGCAGGCTTTATGCTTGTATGGTTCAGCATGGAATAATAAGATA  
GGACTTCGGTCTCTTTTTGTTGGCTATAGAACCAAAGTAATGATTGAAAGGGATAGTTGG  
GGGTGCTAGTATTTAATGGTCAGCGGTGAAATGCGTGGACCCATTAAAGACTAACTTATG  
CGAAAGCATTACCAAGGATATCCTCT

>C002\_01

AGCTCCAATAGCGTATATTAAGTTGTTGCAGTTAAAAGGCTCGTAGTCAATATATGAC  
CCCTGTGAACCTGGACCCTTCTAGTAAAGTGAGCGCCGGTGTTCACGGGTCATCCTTC  
TGGACAACACATACGCCCTTGATTGGGTCGCATGTGCCATCCAGATCATTTACTGTGAAC  
AAATCAAAGTGTCAAAGCAGGCTTCAAGCTTGTATGGTTCAGCATGGAATAATAAGATA  
GGACTTCGGCTCTATCCTGTTGGCTATAGAACCAAAGTAATGATTGATAGGGATAGTTGG  
GGGTGCTAGTATTTAGCGGTGAGCGGTGAAATGCGGAGACCCGTTAAAGACTAACTTATG  
CGAAAGCATTACCAAGGATATCCTCT

>C003\_01

AGCTCCAATAGCGTATATTAAGTTGTTGCAGTTAAAAGGCTCGTAGTCAATGTATGGC  
CCTGGTGAACCTGGCCCGCTTCTAGTAAAGTGAGCGCCGGTGTTCACGGGTCATCCTT  
CTGGAGAGCACTTCTGCCCTTGATTGGGTTGGTTGTGTAATTCAGATCATTTACTGTGAA  
CAAATCAAAGTGTCAAAGCAGGCTTCAGCCTTGTATGGTTCAGCACGGAATAATAAGAT  
AGGACTTCGGTCTGTTTTGTTGGCTATAGAACCAAAGTAATGATTGATAGGGATAGTTG  
GGGGTGTAGTATTTAACGGTCAGCGGTGAAATGCGGGGACCCGTTAAAGACTAACTTAT  
GCGAAAGCATTACCAAGGATATCCTCT

>C004\_03

AGCTCCAATAGCGTATATTAAGTTGTTGCAGTTAAAAGGCTCGTAGTCAATGTATGGC  
CTTGTGAACCTGACCCACTTCTAGTAAAGTGAGCGTCCGGTGTTCACGGGTCATCCTTCT  
GGAAAGCATCTCTGCCCTTGATTGGGTTGGTTATGTAATTCAGATCATTTACTGTGAACA  
AATCAAAGTGTCAAAGCAGGCTTTATGCTTGTATGGTTCAGCACGGAATAATAAGATAG  
GACTTCGGTTTTATTTTTGTTGGCTATAGAACCAAAGTAATGATTGAAAGGGATAGTTGG  
GGGTGCTAGTATTTAACGGTCAGCGGTGAAATGCGTGGACCCGTTAAAGACTAACTTATG  
CGAAAGCATTACCAAGGATATCCTCT

>C005\_02

AGCTCCAATAGCGTATATTAAGTTGTTGCAGTTAAAAGGCTCGTAGTCAATTTATGAC  
CACGTAGAACCTAGTCCATCCTAGTGGATGAGTGTGGTGTTCACGGGTCATCCTTCTG  
GAGAGCACCTCTGCCCTTGATTGGGTTGGTTGTGTAATTCAGATCATTTACTGTGAACAA  
ATCAAAGTGTCAAAGCAGGCTCAAGCTTGTATGGTTCAGCATGGAATAATAAGATAGG  
ACTTCGGTCTGTTTTGTTGGCTGCAGGAACCAAAGTAATGATTGAAAGGGATGGTTGGG  
GGTGTCTCGTATTGAGTGGTCAGCGGTGAAATGCGTAGACCCACTTAAGACGAACCTTATG  
GAAAGCATTACCAAGGACATCTCT

>C006\_01

AGCTCCAATAGCGTATATTAAGTTGTTGCAGTTAAAAGGCTCGTAGTCAATTTATGAT  
CGCGTCGAACCTGGTCCGTTCTCTCGTAGGGCGTGCACCGGTGTTCACGGATCATCCTTC  
TGGAGAGCACCTCTGCCCTTGATTGGGTTGGTTGTGTAATTCAGATCATTTACTGTGAAA  
AAATCAGAGTGTCAAAGCAGGCTTCAGCTTGTATGGTTCAGCATGGAATAATAAGATA  
GGACTTCGGTCTCTTCTTGTGGTTATGGAATCAAAGTAATGATATATGGGGATGGTTGGG  
GGTGTAGTATTGAATGGTCAGCGGTGAAATGCGTAGACCCATTAAAGACTAACTTATG  
GAAAGCATTACCAAGGACATCTCT

>C007\_02

AGCTCCAATAGCGTATATTAAGTTGTTGCAGTTAAAAGGCTCGTAGTCAATTTATGTC  
CACGTAGAACCTGGTCCATCCTCTCGTAGGGTGCACCGGTGTTCACGGGACATCCTTC  
TGGAGAGCACCTCTGCCCTTGATTGGATTGGTTGTGTAATTCAGATCATTTACTGTGAAA

AAATCAGAGTGTTCAAAGCAGGCGTTCAGCTTGTATGGTTCAGCATGGAATAATAAGATA  
GGACTTAGGTTCTACTTGTGGTTATGGAATCCAAGTAATGATATATAGGGATGGTTGGG  
GGTGCTAGTATTGAATGGTCAGCGGTGAAATGCATAGACCCATTTAAGACTAACTTATGC  
GAAAGCATTACCAAGGACATCTCT

>C008\_02

AGCTCCAATAGCGTATATTTAAAATTGTTGCAGTTAAAAGGCTCGTAGTTCGAATGTATGAT  
CACGTAGAACCTGGCTCACTCTCTAGTAGGGTGTAGTCGGTGTTCACGGGTCATCCTTCT  
GGAAAGCGCTTTCTGCCCTTGATTGGGTTGGTTGTGTGATTTCAGATCATTTACTGTGAAC  
AAATCAGAGTGTTCAAAGCAGGCGTTCGCTGTATGGTTCAGCATGGAATAATAAGATAG  
GACTTCGGTCTTTTTTGTGGCTATGGAACCAAAGTAATGATTTAAAAGGGATAGTTGGGG  
GTGCTAGTATTGAATGGTCAGCGGTGAAATGCGTAGACCCATTTAAGACTAACTTATGCG  
AAAGCATTACCAAGGATATCTTCT

>C009\_01

AGCTCCAATAGCGTATATTTAAAATTGTTGCAGTTAAAAGGCTCGTAGTTCGAATTTATGAT  
CTTGTAGAACCTGACCTACACTCTAGTAGTGTATGTGTCGGTGTTCACAGATCATCCTTC  
TGGAAAGCACCTCTGCCCTTGATTGGGTTGGTTGTGTAATTCAGATCATTTACTGTGAAC  
AAATCAAAGTGTTCAAAGCAGGCATTTGCGCTGTATGGTTCAGCATGGAATAATAAGATA  
GGACTCTGGTCTGTTTTTGTGGCTATGGAGCCAAAGTAATGATTGAAAGGGATGGTTGG  
GGGTGCTAGTATTGAATGGTCAGCGGTGAAATGCGTAGACCCATTTAAGACTAACTTATG  
CGAAAGCATTACCAAGGACATCTTCT

>C010\_03

AGCTCCAATAGCGTATATTTAAAATTGTTGCAGTTAAAAGGCTCGTAGTTCGAATTTATGAC  
CACTGTGAACCTGGTGTACTCTCTAGTAGAGTATTTATTAGGTTACGGGTCATCCTTCT  
GGAAAGCACTTCTGCCCTTGATTGGGTTGGTTGTGTGATTTCAGATCATTTACTGTGAACA  
AATCAAAGTGTTCAAAGCAGGCTCTCGGGCTTGATGGTTCAGCATGGAATAATAAGATA  
GGACTTTGGTCTGTTTTTGTGGCTATAGAACCAGAGTAATGATTGAAAGGGATAGTTGG  
GGGTGCTAGTATTTAGCGGTCAGCGGTGAAATGCGTAGACCCGTTAAAGACTAACTTATG  
CGAAAGCATTACCAAGGATATCTTCT

>C011\_01

AGCTCCAATAGCGTATATTTAAAATTGTTGCAGTTAAAAGGCTCGTAGTTCGAATTTTTGGC  
TTTGTAGAACCTGGTCCACTCTCTAGTTAGGGTGAGCGCCGGTGTTCACAAGTCTTCCTC  
CTAAGGAGTACTTCTGCCCTTGATTGGGTTGGTTGTACAAGTTAGGTCAATTACTGTGAA  
CAAATCAAAGTGTTCAAAGCAAGCTTAACGCTTGAATGGTTCAGCATGGAATAATAAGAT  
AGGGCTTCGGTCTATTTTTATTGGCTAAAGAACCAAAGTAATGATTAAAAGGGATAGTTG  
GGGGTGTAGTATTTAACGGTTAGCGGTGAAATGCGTAGACCCGTTAAAGACTAACTTAT  
GCGAAAGCATTACCAAGGATATCTTCT

>C012\_04

AGCTCCAATAGCGTATATTTAAAATTGTTGCAGTTAAAAGGCTCGTAGTTCGAATGTATGGC  
TTGGTAGAACCTGGTCCACCCTCTAGTTAGGGTGAGCGCCGGTGTTCACCGGTCATCCTT  
CTGGAGAGCACTTCTGCCCTTGATTGGGTTGGTTGTGTAATTCAGATCATTTACTGTGAA  
CAAATCAAATGTTCAAAGCAGGCTTTACGCTTGTATGGTTCAGCATGGAATAATAAGAT  
AGGACTTCGGTCTGTTTTTGTGGCTATACGAACCAAAGTAATGATTAAAAGGGATAGTT  
GGGGTGTAGTATTTAGTGGTTAGCGGTGAAATGCGTAGACCCACTAAAGACTAACTTA  
TGCGAAAGCATTACCAAGGATATCTTCT

>C013\_01

AGCTCCAATAGCGTATATTTAACATTGTTGCAGTTAAAAGGCTCGTAGTTCGAATGTATGGT  
TTCGTAGAACCTGACCCGTTCTCTAGTTAGAACGCGGTGCGTGTTCACGGGCCATCCTT  
CTGGAGAGCACTTCTGCCCTTGATTGGGTTGGTTGTGTGATTTCAGATCATTTACTGTGAA  
CAAATCAAAGTGTTCAAAGCAGGCTTTACGCTTGTATGGTTCAGCATGGAATAATAAGAT  
AGGACTTTGGTCTGTTTTTGTGGCTTACGAGCCAAAGTAATGATTAAAAGGGATAGTT  
GGGGTGTAGTATTTAACGGTTAGCGGTGAAATGCGTAGACCCGTTAAAGACTAACTTA  
TGCGAAAGCATTACCAAGGATATCTTCT

>C014\_01

AGCTCCAATAGCGTATATTTAAAATTGTTGCAGTTAAAAGGCTCGTAGTTCGAATGTATGAT  
CACGTAGAACCTGATCTATCCTCTAGTAGGATACGTATCGGTGTTCACGGGTCATCCTTC  
TGGAAAGCACTTCTGCCCTTGATTGGGTTGGTTGTGTGATTTCAGATCATTTACTGTGAAC  
AAATCAAAGTGTTCAAAGCAGGCTTAACAGCTTGTATGGTTCAGCATGGAATAATAAGAT  
AGGACTTCGGTCTGTTTTTGTGGCTATGGAACCAAAGTAATGATTAAAAGGGATAGTTG  
GGGGTGTAGTATTGACCGGCCAGAGGTGAAATCTTGATTTCGGTCAAGACTAACTTAT  
GCGAAAGCATTACCAAGGATATCTTCT

>C015\_01

AGCTCCAATAGCGTATATTTAAAATTGTTGCAGTTAAAAGGCTCGTAGTTCGAATGTATGAC  
ACTGTAGAACCTGGTCCATTCTCTAGTTAGAATGAGTGCCGGTGTTCACAGGTCATCCTT  
CTGGAAAGCACTTCTGCCCTTGATTGGGTTGGTTGTGTAATTCAGATCATTTACTGTGAA

CAAATCAAAGTGTTCAAAGCAGGCTGCAAAGCTTGTATGGTTCAGCATGGAATAATAAGA  
TAGGACTTAGGTTTGTGGCTTGACGAACCAAAGTAATGATTAAAAGGGATAGTT  
GGGGTGCTAGTATTTAACGGTTAGCGGTGAAATGCGTAGACCCGTTGAAGACTAECTTA  
TGCGAAAGCATTACCAAGGATATCTTCT

>C016\_01

AGCTCCAATAGCGTATATTTAAAATTGTTGCAGTTAAAAGGCTCGTAGTCGAATGTATGAC  
ACTGTAGAACCTGGACCATCCTCTCGTTAGGATGTGCTCCGGTGTTCACAGGTCATCCTT  
CTGGAGAGCACTTCTGCCCTTGATTGGGTTGGTTGTGTGATTACAGTCATTTACTGTGAA  
CAAATCAAAGTGTTCAAAGCAGGCTGAAAGCTTGTATGGTTCAGCATGGAATAATAAGAT  
AGGACTTCGGTCTCTTCTTGTGGCTTGACGAACCAAAGTAAGTAAAGGGATAGTTG  
GGGGTGCTAGTATTTAATGGTTAGCGGTGAAATGCGTAGACCCATTAAAGACTGACTTAT  
GCGAAAGCATTACCAAGGATATCTTCT

>C017\_03

AGCTCCAATAGCGTATATTTAAAATTGTTGCAGTTAAAAGGCTCGTAGTCGAATGTATGAC  
ACTGTAGAACCTGGACCATCCCCACGTTGGGATGTGCTCCGGTGTTCACAGGTCATCCTT  
CTGGAGAGCACTTCTGCCCTTGATTGGGTTGGTTGTGTGATTACAGTCATTTACTGTGAA  
CAAATCAAAGTGTTCAAAGCAAGCTTCAAAGCTTGTATGGTTCAGCATGGAATAATAAGA  
TAGGACTTCGGTCTCTGTTTTGTTGGCTTAACGAACCAAAGTAATGATTAAAAGGGATAGT  
TGGGGTGCTAGTATTTAATGGTTAGCGGTGAAATGCGTAGACCCATTAAAGACTGACTTAT  
ATGCGAAAGCATTACCAAGGATATCTTCT

>C018\_02

AGCTCCAATAGCGTATATTTAAAATTGTTGCAGTTAAAAGGCTCGTAGTCGAATGTATGGC  
CCTGTAGAACCTGGCCCACTCCACGTTAGGTTGCGCGCCGGTGTTCACGGGTCATCCTTG  
TGGAGAGTGCTTCTGCCCTTGATTGGGTTGGTTGTACAATTCACATCATTTACTGTGAAC  
AAATCAAAGTGTTCAAAGCAGGCTTTTTAGCTTGTATGGTTCAGCATGGAATAATAAGA  
TAGGACTTTGGTTTTATTTTGTGGCTAATAACCAAAGTAATGATTGAAAGGGATAGTTG  
GGGGTGCTAGTATTTAGCGGTCAGCGGTGAAATGCGGGGACCCGTTAAAGACTAACTTAT  
GCGAAAGCATTACCAAGGATATCTTCT

>C019\_01

AGCTCCAATAGCGTATATTAACATTGTTGCAGTTTAAAGGCTCGTAGTCGAATTTATGTC  
TCCATAGATCCTGACCAACCTTTCTAAGGTTAGAGTCCGGTGTATCATGGGTCATCCTTGT  
GGAGAGTGCTTCTGCCCTTGATTGGGTCGGTTGTACAATTCACATCATTTACTGTGAACA  
AATCAGAGTGTTCAAAGCAGGCTTTGTAGCTTGTATGGTTCAGCATGGAATAATAAGAT  
AAGACCTTGGTTTTATTTTGTGGCTTAGTGACCAAAGTAATGATTGATAGGGATAGTTG  
GGGGTGCTAGTATTTAGTGGTCAGCGGTGAAATGCTCGGACCCACTAAAGACTAACTTAT  
GCGAAAGCATTACCAAGGATATCTTCT

>C020\_03

AGCTCCAATAGCGTATATTTAAAATTGTTGCAGTTAAAAGGCTCGTAGTCGAATATATGAC  
ACCATAGATCCTGGCCCACTTTCTAGTAAGGTGAGAGCTGGTGCATCATGGGTCATCCTT  
GTGGAGAGTGCTTCTGCCCTTGATTGGGTCGGTTGTACAATTCACATCATTTACTGTGAA  
CAAATCAGAGTGTTCAAAGCAGGCTTTGCAGCTTGTATGGTTCAGCATGGAATAATAAGA  
TAAGACTTTGGTGTATTTTGTGGCTTTAGACCAAAGTAATGATTGAAAGGGATAGTT  
GGGGTGCTAGTATTTAATGGTCAGCGGTGAAATGCGTGGACCCATTGAAGACTAECTTA  
TGCGAAAGCATTACCAAGGATATCTTCT

>C021\_01

AGCTCCAATAGCGTATATTTAAAATTGTTGCAGTTAAAAGGCTCGTAGTCGAATATATGAC  
TTCCATAGATCCTGGCCCACTTTCTAGTAAGGTGAGAGCCGGTGCATCATGGGTCATCCT  
TGTGGAGAGTGCTTCTGCCCTTGATTGGGTCGGTTGCTCAATTCACATCATTTACTGTGA  
ACAAATCAGAGTGTTCAAAGCAGGCTTTTGTAGCTTGTATGGTTCAGCATGGAATAATA  
AGATAAGACTTTGGTTTTTATTTTGTGGCTTTACGACCAAAGTAATGATTGAAAGGGAT  
AGTTGGGGTGCTAGTATTTAGTGGTCAGCGGTGAAATGCGTGGACCCACTTAAGACTTA  
CTTATGCGAAAGCATTACCAAGGATATCTTCT

>C022\_01

AGCTCCAATAGCGTATATTAAGTTGTTGCAGTTAAAAGGCTCGTAGTCGAATGTATGAC  
TCCATAGATCCTGGCCCACTTTCTAGTAAGGTGAGAGCTGGTGTATCATGGGTCATCCTT  
GTGGAGAGTGCTTCTGCCCTTGATTGGGTTGGTTGTACAATTCACATCATTTACTGTGA  
ACAAATCAGAGTGTTCAAAGCAAGCTTTTGCAGCTTGTATGGTTCAGCATGGAATAATA  
GATAAGACTTTGGTTTTTATTTTGTGGCTTTATGACCAAAGTAATGATTGAAAGGGAT  
AGTTGGGGTGCTAGTATTTAGTGGTCAGCGGTGAAATGCGTGGACCCACTTAAGACTTA  
CTTATGCGAAAGCATTACCAAGGATATCTTCT

>C023\_03

AGCTCCAATAGCGTATATTTAAAATTGTTGCAGTTAAAAGGCTCGTAGTCGAATGTATGAT  
TCCATAGATCCTGGCCCACTCTGCTAGTCAGGTGAGAGCCGGTGTATCATGGGTCATCCTT  
GTGGAGAGTGCTTCTGCCCTTGATTGGGTTGGTTGTATAATTCACATCATTTACTGTGAA

CAAATCAGAGTGTTCAAAGCAGGCTTTGCAGCTTGTATGGTTCAGCATGGAATAATAAGA  
TAAGACTTCGGTTTTTATTTTGTGGCTTTATGACCAAAGTAATGATTGAAAGGGATAGT  
TGGGGGTGCTAGTATTGAGTGGTCAGCGGTGAAATGCGTGGACCCACTTAAGACTTACTT  
ATGCGAAAGCATTACCAAGGATATCTTCT

>C024\_07

AGCTCCAATAGCGTATATTTAAAATTGTTGCAGTTAAAAGGCTCGTAGTTCGAATTTATGAT  
TCCATAGATCCTGGCCCACTTTCTAGTAAGGTGAGAGCTGGTGTATCATGGGTCATCCTT  
GTGGAGAGTGCTTCTGCCCTTGATTGGGTTGGTTGTACAATTCACATCATTTACTGTGAA  
CAAATCAGAGTGTTCAAAGCAGGCTTTGCAGCTTGTATGGTTCAGCATGGAATAATAAGA  
TAAGACTTCGGTTTTTATTTTGTGGCTTTATGACCAAAGTAATGATTGAAAGGGATAGT  
TGGGGGTGCTAGTATTGAGTGGTCAGCGGTGAAATGCGTGGACCCACTTAAGACTTACTT  
ATGCGAAAGCATTACCAAGGATATCTTCT

>C025\_01

AGCTCCAATAGCGTATATTTAAAATTGTTGCAGTTAAAAGGCTCGTAGTTCGAATATATGAC  
ACCATAGATCCTGGCCCACTTTCTAGTTAAGGTGAGCGCGGTGCATCATGGGTCATCC  
TTGTGGAGAGTGCTTCTGCCCTTGATTGGGTCGGTTGTGCAATTCACATCATTTACTGTG  
AACAAATCAGAGTGTTCAAAGCAGGCTTTTGCAGCTTGTATGGTTCAGCATGGAATAATA  
AGATAAGACTTCGGTTTTTATTTTGTGGCTTTATGACCAAAGTAATGATTGAAAGGGATA  
GTTGGGGGTGCTAGTATTTAATGGTCAGCGGTGAAATGCGTGGACCCATTAAGACTAAC  
TTATGCGAAAGCATTACCAAGGATATCTTCT

>C026\_02

AGCTCCAATAGCGTATATTTAAAATTGTTGCAGTTAAAAGGCTCGTAGTTCGAATATATGAT  
TCCATAGATCCTGGCCCACTTTCTAGTAGGGTGAGAGCCGGTGAATCATGGGTCATCCTT  
GTGGAGAGCACTTCTGCCCTTGATTGGGTTGGTTGTGCAATTCACATCATTTACTGTGAA  
CAAATCAAAGTGTTCAAAGCAGGCTTTTGCAGCTTGTATGGTTCAGCATGGAATAATAAG  
ATAAGACTTCGGTTTTTATTTTGTGGCTTTATGACCAAAGTAATGATTGAAAGGGATAG  
TTGGGGGTGCTAGTATTTAATGGTCAGCGGTGAAATGCGTGGACCCATTAAGACTAACT  
TATGCGAAAGCATTACCAAGGATATCTTCT

>C027\_01

AGCTCCAATAGCGTATATTTAAAATTGTTGCAGTTAAAAGGCTCGTAGTTCGAATATATGGC  
ACCATAGATCCTGGCCCACTTTCTAGTAAGGTGAGAGCTGGTGTATCATGGGTCATCCTT  
GTGGAGAGCGTTTCTGCCCTTGATTGGGTTGGTTGCGCAATTCACATCATTTACTGTGAA  
CAAATCAGAGTGTTCAAAGCAGGCTTTTGCAGCTTGTATGGTTCAGCATGGAATAATAAG  
ATAAGACTCTGGTCTCATTTTGTGGCTTTATTGACCAAAGTAATGATGGAAGGGATAG  
TTGGGGGTGCTAGTATTCAATGGTCAGCGGTGAAATGCACGGACCCATTGAAGACTAACT  
TATGCGAAAGCATTACCAAGGATATCTTCT

>C028\_05

AGCTCCAATAGCGTATATTTAAAATTGTTGCAGTTAAAAGGCTCGTAGTTCGAATATATGAC  
TCCATAGATCCTGGCCCACTTTCTAGTAGGATGAGAGCTGGTGTATCATGGGTCATCCTT  
GTGGAGAGCATTTCTGCCCTTGATTGGGTTGGTTGTGCAATTCACATCATTTACTGTGAA  
CAAATCAGAGTGTTCAAAGCAGGCAATTTGCAGCTTGTATGGTTCAGCATGGAATAATAAG  
ATAAGACTCTGGTCTTATTTTGTGGCTTTAATGACCAAAGTAATGATGGAAGGGATAGT  
TGGGGGTGCTAGTATTCAATGGTCAGCGGTGAAATGCGTGGACCCATTGAAGACTAACT  
ATGCGAAAGCATTACCAAGGATATCTTCT

>C029\_04

AGCTCCAATAGCGTATATTTAAAATTGTTGCAGTTAAAAGGCTCGTAGTTCGAATATATGGC  
TCCATAGATCCTTGGCCATCTTCTAGTAAGATGAGAGCCGGTGTATCATGGGTCATCCTT  
TGTGGAGAGTACCTTCTGCCCTTGATTGGGTTAGGTTGTGCAATTCACATCATTTACTGTG  
AACAAATCAGAGTGTTCAAAGCAGGCAATTTGCAGCTTGTATGGTTCAGCATGGAATAATA  
AGATAAGACTCTGGTCTTATTTTGTGGCTTTAATGACCAAAGTAATGATGGAAGGGATAGT  
AGTTGGGGGTGCTAGTATTCAATGGTCAGCGGTGAAATGCGTGGACCCATTGAAGACTAA  
CTTATGCGAAAGCATTACCAAGGATATCTTCT

>C030\_01

AGCTCCAATAGCGTATATTTAAAATTGTTGCAGTTAAAAGGCTCGTAGTTCGAATTTATGGC  
TCCATAGATCCTTGGCCATCTTCTAGTAAGATGAGAGCCGGTGCATCATGGGTCATCTTT  
GTGGAGAGCACTTCTGCCCTTGATTGGGTTGGTTGTGCAATTCACATCATTTACTGTGAA  
CAAATCAGAGTGTTCAAAGCAGGCTTTTGTAGCTTGTATGGTTCAGCATGGAATAATAAG  
ATAAGACTCTGGTCTTATTTTGTGGCTTTAATGACCAAAGTAATGATGGAAGGGATAGT  
TGGGGGTGCTAGTATTCAATGGTCAGCGGTGAAATGTGTGGACCCATTGAAGACTAACT  
ATGCGAAAGCATTACCAAGGATATCTTCT

>C031\_04

AGCTCCAATAGCGTATATTTAAAATTGTTGCAGTTAAAAGGCTCGTAGTTCGAATGTATGAC  
ACCATAGATCCTAGCCATCTTCTAGTAAGATGAGAGCTGGCGTATCATGGGTCATCCTT  
TGTGAAGAACTTCTGCCCTTGATTGGGTCGGTTGTGCAATTCACATCATTTACTGTGA

ACAAATCAGAGTGTTCAAAGCAGGCTTTTGCAGCTTGTATGGTTCAGCATGGAATAATAA  
GATAAGACTCTGGTCTTATTTTGTGGCTTATCGACCAAAGTAATGATGGAAAGGGATAG  
TTGGGGGTGCTAGTATTCAATGGTCAGCGGTGAAATGTGTGGACCCATTGAAGACTAACT  
TATGCGAAAGCATTACCAAGGATATCTTCT

>C032\_01

AGCTCCAATAGCGTATATTAAGTTGTTGCAGTTAAAAGGCTCGTAGTTCGAACATATGGC  
CCTGTGAACCTGGCCCACTCTCTAGTAGAGCGCGCCGGTGTGCACGGGTCATCCTTCT  
GGAGAGCACCTCTGCCCTTGATTGGGTCGGTGTGTAAATTCAGATCATTACTGTGAGAA  
AATCAGAGTGTTCAAAGCAGGCTTCAAGCTTGTATGGTTCAGCATGGAATAATAAGATAG  
GGCTTCGGTCTATTTTCGTTGGCTGTGGAACCAAAGTAATGATTGATAGGGATAGTTGGG  
GGTGTAGTATTCAATGGTCAGCGGTGAAATGCATGGACCCATTGAAGACTAACTTAAGC  
GAAAGCATTACCAAGGATATTTTCT

>C033\_01

AGCTCCAATAGCGTATATTAAGTTGTTGCAGTTAAAAGGCTCGTAGTTCGAATGTATGAC  
CTCGTGAACCTGGCCCACTCTACATAGAGCTAGCGCTGATGTGCATGGGTCATCCTTCTG  
GAAAGCATCTCTGCCCTTGATTGGGTTGGTTTTGTAATTCAGATCATTACTGTGAGAAA  
ATCAGAGTGTTCAAAGCAGGCTTTATGCTTGTATGGTTCAGCATGGAATAATAATATAGG  
GCTTCGGTCTATTTTGTGGCTGTGGAACCTAAGTAATGATTGAAAGGGATAGTTGGGG  
GTGCTAGTATTCAATGGTCAGCGGTGAAATGCATGGACCCATTGAAGACTAACTTAAGC  
AAAGCATTACCAAGGATATCTTCT

>C034\_01

AGCTCCAATAGCGTATATTAAGTTGTTGCAGTTAAAAGGCTCGTAGTTCGAATTTATGGG  
CTTTGAGCACCTGACTATCCTCTAGTAGGGTAAGCTCGGGTGTGCTCGGCTCATCTTTC  
TGGAAGCGTTCTGCCCTTGATTGGGTTGGTTTGCCTGATCCAGTGCATTTACTGTGAGT  
AAATCAAAGTGTTCAAAGCAGGCTTTAAGCTTGTATGGTTCAGCATGGAATAATAAGATA  
GGACTTTGGTTTTATCTTGTGGCTATAGGACCAAAGTAATGATTGAAAGGGATAGTTGG  
GGGTGCTAGTATTTAATGGTCAGCGGTGAAATGCACAGACCCATTAAAGACTAACTTATG  
CGAAAGCATTACCAAGGATATCTTCT

>C035\_01

AGCTCCAATAGCGTATATTAAGTTGTTGCAGTTAAAAGGCTCGTAGTTCGAATATATGAC  
CCTGTGAACCTGACCCATTCTCTAGTAGAATGAGCGTTGGTGTGCACGGGTCATCCTTCT  
GGAGACCGCTCTGCCCTTGATTGGGTTGGTTGTGTTATTCAGATCATTACTGTGAGTA  
AATCAAAGTGTTCAAAGCAGGCTTCAAGCTTGTATGGTTCAGCATGGAATAATAAGATA  
GGGCTTTGGTTTTATCTTCTGTTGGCTGAGAACTAAAGTAATGATTGAAAGGGATAGTTGG  
GGGTGCTAGTATTGAACGGTCAGCGGTGAAATGCTCAGACCCGTTCAAGACTAACTTATG  
CGAAAGCATTACCAAGGATATCTTCT

>C036\_01

AGCTCCAATAGCGTATACTAAAGTTGTTGCAGTTAAAAGGCTCGTAGTTCGAATGTATGAT  
CCTAATTGCACCTGGCCCACTTATCCAATTTTATGTGTGATGATGAGTGTGGTGTGCATA  
GGTCATCCTTCTGGAGAGTGTATCTTGCCTTTGATTAGGTATTTGATGTTTTACATAAT  
TCAGATCATTACTGTGAGTAAATCAGAGTGTTCAAAGCAGGCATAAATTTTTATGCTT  
GAATGGTTCAGCATGGAATAATAAGATAGGACTTTGGTTTTAATTTTGTGGCTATGGTAC  
CAAAGTAATGATTGAAAGGGATAGTTGGGGGTGCTAGTATTGACGGTCAGCGGTGAAAT  
GCATGGACCCGTTCAAGACTAACTTATGCGAAAGCATTACCAAGGATATCTTCT

>C037\_02

AGCTCCAATAGCGTATATTAAGTTGTTGCAGTTAAAAGGCTCGTAGTTCGAATGTATGAT  
CTAGTGTACCTGGCCCGTCTCATTAGTAGGATGAGCGCTGGTGTGCATGGGTCATCCTT  
CTGGAGAGCGTCTCTGCCCTTGATTAGGTTGGYTTTCGTAATTCAGATCCTTTACTGTGAG  
TAAATCAGAGTGTTCAAAGCAAGCTTCAAGCTTGAATGGTTCAGCATGGAATAATAAG  
ATAGGACTTTGGTTTTATTTTGTGGCTATGGAGCCTAAGTAATGATTGAAAGGGATAGT  
TGGGGGTGCTAGTATTGGGCGGTACGCGGTGAAATGCATGGACCCGTTCAAGACTAACTT  
ATGCGAAAGCATTACCAAGGATATCTTCT

>C038\_01

AGCTCTGATAGCGTATATTAAGTTGTTGCAGTTAAAAGGCTCGTAGTTCGAACCTGTGGC  
CCTGGTCTCTGGCCCACTCTCTAGGAGAATGAGTGTGGTGCAGCCGGGTCATCCTTCT  
GGAAAGTCTCTGCCCTTGATTGGGTCGGTGTGCAATTCAGATCATTACTGTGAGTA  
AATCAAAGTGTTCAAAGCAGGCTTTATGCTTGTATGGTTCAGCATGGAATAATAAGATAG  
GACTTTGGTCTGTTTCGTTGGCTGTGGAACCTAAGTAATGATTGATAGGGATAGTTGGG  
GGTGTAGTATTGGATGGTCAGCGGTGAAATGCATAGACCCATTCAAGACTAACTTATGC  
GAAAGCATTACCAAGGATATCTTCT

>C039\_03

AGCTCCGATAGCGTATATTAAGTTGTTGCAGTTAAAAGGCTCGTAGTTCGAACCTGTGAC  
CTTGTGCACCTGGCCCAACCTCACGGAGGCTGCGTGTGGTGTGCACAGGTCATCCTTCT  
GGAGAGCGTCTCTGCCCTTGATTGGGTTGGTTTTCGTAATTCAGATCATTACTGTGAGTA

AATCAAAGTGTTC AAGGCAGGCTTTATGCTTGTATGGTTCAGCATGGAATAATGAGATAG  
GACTTTGGTTCATTTTCGTTGGCTGTGGAAC TAAAGTAATGATTGATAGGGATAGTTGGG  
GGTGCTAGTATTGGATGGTCAGCGGTGAAATGCATAGACCCATTCAAGACTAACTTATGC  
GAAAGCATTACCAAGGATATCTTCT

>C040\_14

AGCTCCAATAGCGTATGCTAAAATTGTTGCAGTTAAAAGGCTCGTAGTCGAATTTATGGC  
TTTTTCGTGTTTTGCCCATGTTCTAGTAATGTGAGTGCAGATGTTTCGTTGGTCATCCTTCT  
GAAAAGCATTCTGCCCTTGATTGGGTTGGTCTTGTAATTCAGATCATTACTGTGAGTA  
AATCAAAGTGTTC AAGGCAGGCTTTATGCTTGTATGGTTCAGCATGGGATAATGATATAG  
GACTTTGGTTCATTTTCGTTGGCTATGAACTAAAGTAATGATTGATAGGGATAGTTGGGG  
TGCTAGTATTGGATGGTCAGCGGTGAAATGCATAGACCCATTCAAGACTAACTTATGCGA  
AAGCATTACCAAGGATATCTTCT

>C041\_03

AGCTCCAATAGCGTATATTAAGTTGTTGCAGTTAAAAGGCTCGTAGTCGAACCTTGTTGGC  
CTTGTGAACCTGGCCCTTCTTCTAAGAAGATGAGTGCCTGGTGTTCACAGGTCATCCTTCT  
GGAAAGCATTCTGCCATTGATTTGGTTGGTCTTGTAATTCAGATCATTACTGTGAGTA  
AATCAAAGTGTTC AAGGCAGGCTTTATGCTTGTATGGTTCAGCATGGAATAATGATATAG  
GACTTTGGTTCATTTTCGTTGGCTGTGGAATCAAAGTAATGATTGATAGGGATAGTTGGG  
GGTGCTAGTATTGGATGGTCAGCGGTGAAATGCATAGACCCATTCAAGACTAACTTATGC  
GAAAGCATTACCAAGGATATCTTCT

>C042\_03

AGCTCCAATAGCGTATATTAAGTTGTTGCAGTTAAAAGGCTCGTAGTCGAACCTTATGGC  
TTTGTGGACCTGGCCCATCTTCAAAGAAGTTGAGTGCCGGTGTCTGCTGGTCATCCTTCT  
GAAAGCATTCTGCCATTGATTTGGTTGGTCTTGTGATTCAGATCATTACTGTGAGTA  
AATCAAAGTGTTC AAGGCAGGCTTTATGCTTGTATGGTTCAGCATGGAATAATGATATAG  
GACTTTGGTTCATTTTCGTTGGCTGTGGAATCAAAGTAATGATTGATAGGGATAGTTGGG  
GGTGCTAGTATTGGATGGTCAGCGGTGAAATGCATAGACCCATTCAAGACTAACTTATGC  
GAAAGCATTACCAAGGATATCTTCT

>C043\_03

AGCTCCAATAGCGTATATTAAGTTGTTGCAGTTAAAAGGCTCGTAGTCGAACCTTATGAC  
CTCGCGGACCTGGCCCATCTTCAAAGAAGTTGAGCGCCGGTGTCTGCTGGTCATCCTTCT  
GGAAAGCATTCTGCCATTGATTTGGTTGGTCTTGTGATTCAGATCATCTACTGTGAGTA  
AATCAAAGTGTTC AAGGCAGGCTTTATGCTTGTATGGTTCAGCATGGAATAATGATATAG  
GACTTTGGTTCATTTTCGTTGGCTGTGGAATCAAAGTAATGATTGATAGGGATAGTTGGG  
GGTGCTAGTATTGGATGGTCAGCGGTGAAATGCATAGACCCATTCAAGACTAACTTATGC  
GAAAGCATTACCAAGGATATCTTCT

>C044\_03

AGCTCCAATAGCGTATATTAACGTTGTTGCAGTTAAAAGGCTCGTAGTCGAATGTATGAC  
CCTGTGAACCCGGCCACTCTCTAGTAGAGTGAGCGCCGGTGTGCACGGGTCATCTTCT  
GGAGAGCATTCTGCCCTTGAGTGGGTTGGTTGTGTAATCCAGAACATTTACTGTGAGAA  
AATCAGAGTGTTC AAGGCAGGCTTTGATTGCTCGAATGGTTCAGCATGGAATAATAAGAT  
AAGACTTCGGTTCATTTTGTGGCTATGGAACCAAAGTAATGATTAATAGGGATGGTTG  
GGGGTGCTAGTATTTAATGGTTCAGCGGTGAAATGCATGGACCCATTAAAGACTAACTTAT  
GCGAAAGCATTACCAAGGACATCTTCT

>C045\_01

AGCTCCAGTAGCGTATATTAACGTTGTTGCAGTTAAAAGGCTCGTAGTCGAATGTATGAC  
CCTGTGAACCCGGTCCACTCTCTAGTAGAGTGAGCACC GGTTGCACGGGTCATCTTCT  
GGAGAGCACTTTCTGCCCTTGATTGGGTTGGTTGTGTGATT CAGAACATTTACTGTGAGAA  
AAATCAGAGTGTTC AAGGCAGGCTTTGATTGCTCGAATGGTTCAGCATGGAATAATAAGAT  
TAAGACTTCGGTTCATTTTGTGGCTATAGAACCAAAGTAATGATTAATAGGGATGGTTG  
GGGGTGCTAGTATTTAATGGTTCAGCGGTGAAATGCATGGACCCATTAAAGACTAACTTAA  
AGCGAAAGCATTACCAAGGACATCTTCT

>C046\_02

AGCTCCAATAGCGTATATTAACGCTGTTGCAGTTAAAAGGCTCGTAGTCGAATGTATGAC  
CCTGTGAACCTACCCATTCTCTAGTAGAGTGCGCGTTGGTGTGCACGGGTCATCTTCT  
GGAGAGCACTTCTGCCCTTGATTGGGTTGGTTGTGTGATT CAGAACATTTACTGTGAGAA  
AATCAGAGTGTTC AAGGCAGGCTTTGATTGCTCGAATGGTTCAGCATGGAATAATAAGAT  
AAGACTTCGGCTTCATTTTGTGGCTATAGAACCAAAGTAATGATTAATAGGGATGGTTG  
GGGGTGCTAGTATTTAATGGTTCAGCGGTGAAATGCAAGGACCCATTAAAGACTAACTTAA  
GCGAAAGCATTACCAAGGACATCTTCT

>C047\_03

AGCTCCAATAGCGTATATTAACGTTGTTGCAGTTAAAAGGCTCGTAGTCGAATATATGAC  
CCTGTGAACCTGGCCACTCTCCATGAGAGTGAGTGTCCGGTGTGCACGGGTCATCTTCT  
GGAGAGCACTTCTGCCCTTGATTGGGTTGGTTAGTGTGTAATTCAGAACATTTACTGTGAGT

AAATCAGAGTGTTCAAAGCAGGCTTTGATTGCTCGCATGGTTCAGCATGGAATAATAATA  
TAAGACTTCGGTTTAAATTTTGGTTGGCTATAGAACCAAAGTAATGATTAATAGGGATGGTT  
GGGGTGTAGTATTTAGTGGTCAGCGGTGAAATGCATGGACCCATTAAAGACTGACGTA  
TGCGAAAGCATTCACCAAGGACATCTTCT

>C048\_05

AGCTCCAATAGCGTATATTAACATTGTTGCAGTTAAAAGGCTCGTAGTCAATGTATGAC  
CCTGTGAACCTGGTCCACTCTCTAGTAGAGTGAGCATCGGTGTGCACGGGTCATCTTTCT  
GGAGAGCACTTCTGCCCTTGATTGGGTTGGTGTGTGATTGAGAACATTTACTGTGAGAA  
AATCAGAGTGTTCAAAGCAGGCTTTGATTGCTCGAATGGTTCAGCATGGAATAATAAGAT  
AAGACTTCGGTTTAAATTTTGGTTGGCTATAGAACCAAAGTAATGATTAATAGGGATGGTTG  
GGGGTGTAGTATTTAGTGGTCAGCGGTGAAATGCATGGACCCATTAAAGACTGACGTAT  
GCGAAAGCATTCACCAAGGACATCTTCT

>C049\_07

AGCTCCAATAGCGTATATTAACATTTGTTGCAGTTAAAAGGCTCGTAGTCAATGTATGAC  
CCTGTGAACCTGGCCACTCTCTAGTAGAGTGAGTGTGCGGTGTGCACGGGTCATCTTTCT  
GGAGAGCGCATCTGCCCTTGATTGGGTTGGTGTGTGATTGAGAACATTTACTGTGAGAA  
AATCAGAGTGTTCAAAGCAGGCTTTGATTGCTCGCATGGTTCAGCATGGAATAATAAGAT  
AAGACTTCGGTTTAAATTTTGGTTGGCTATAGAACCAAAGTAATGATTAATAGGGATGGTTG  
GGGGTGTAGTATTTAGTGGTCAGCGGTGAAATGCGAGGACCCACTAAAGACTGACGTAA  
GCGAAAGCATTCACCAAGGACATCTTCT

>C050\_01

AGCTCCAATAGCGTATATTAACATTTGTTGCAGTTAAAAGGCTCGTAGTCAACGTATGAC  
CCTGTGAACCTGGCCACTCTCTAGTAAGGTGAGTGTGCGGTGTGCACGGGTCATCTTTCT  
AAGAGCACTTCTGCCCTTGATTGGGTTGGTGTGTGATTGAGAACATTTACTGTGAGTA  
AATCAGAGTGTTCAAAGCAGGCTTTGATTGCTCGAATGGTTCAGCATGGAATAATAAGAT  
AAGACTTCGGTTTAAATTTTGGTTGGCTATACGAACCAAAGTAATGATTAATAGGGATGGTT  
GGGGTGTAGTATTTAGTGGTCAGCGGTGAAATGCGTAGACCCACTAAAGACTAACTAC  
TGCGAAAGCATTCACCAAGGACATCTTCT

>C051\_02

AGCTCCAATAGCGTATATTAAGTTGTTGCAGTTAAAAGGCTCGTAGTCAATGTATGAC  
CCTGTGAACCCGGCCACTCTCTAGTAGGGTGAGCGTCCGGTGTGCACGGGTCATCTTTCT  
GGAGAGCACTTCTGCCCTTGATTGGGTTGGTGTGTGATTGAGAACATTTACTGTGAGAA  
AATCAGAGTGTTCAAAGCAAGCTTTGATTGCTCGAATGGTTCAGCATGGAATAATAAGAT  
AAGACTTCGGTTTAAATTTTGGTTGGCTATCGAACTAAAGTAATGATTAATAGGGATGATTG  
GGGGTGTAGTATTTAGTGGTCAGCGGTGAAATGCGAAGACCCACTAAAGACTAACGTAA  
GCGAAAGCATTCACCAAGGACATCTTCT

>C052\_29

AGCTCCAATAGCGTATATTAAGTTGTTGCAGTTAAAAGGCTCGTAGTCAATGTATGAC  
CCTGTGAACCTGACCCACTCTCTAGTAGGGTGAGCGTCCGGTGTGCACGGGTCATCTTTCT  
GGAGAGCACTTCTGCCCTTGATTGGGTTGGTGTGTGATTGAGAACATTTACTGTGAGTA  
AATCAGAGTGTTCAAAGCAGGCTTTGATTGCTCGAATGGTTCAGCATGGAATAATAAGAT  
AAGACTTCGGTTTAAATTTTGGTTGGCTATAGAACCAAAGTAATGATTAATAGGGATGATTG  
GGGGTGTAGTATTTAGTGGTCAGCGGTGAAATGCGTAGACCCACTAAAGACTGACGTAA  
GCGAAAGCATTCACCAAGGACATCTTCT

>C053\_01

AGCTCCAATAGCGTATATTAAGTTGTTGCAGTTAAAAGGCTCGTAGTCAACTTATGAT  
CCTGAGAACCTGGCCCGTCTCTAGTAGGATGAGCGCCGGTGTGCTCGGTTTCATCTTCC  
GAAGAGCACCTCTGCCCTTGATTGGGTTGGTGTGTGTAATTTGGTTTCTTTACTGTGAGTA  
AATCAAAGTGTTCAAAGCAGGCTTAATCGCTTGAATGGTTCAGCATGGAATAATAAGATA  
GGACTTTGGTTTAAATTTTGGTTGGCTATAGAACCAAAGTAATGATTGAAAGGGATAGTTG  
GGGTGCTAGTATTGGGTGGTCAGCGGTGAAATGCATGGACCCACTCAAGACTAACTTATG  
CGAAAGCATTCACCAAGGATATCTTCT

>C054\_01

AGCTCCAATAGCGTATATTAAGTTGTTGCAGTTAAAAGGCTCGTAGTCAACTTATGAC  
CCTGTGAACCTGGCCCGTCTCTAGTAGGATGAGTGCCTGGTGTGCGCGGGTCATCTTCC  
GAAGAGCATTCTGCCCTTGATTGGGTTGGTTTTTGTAAATTTGGTGCATTTACTGTGAGT  
AAATCAAAGTGTTCAAAGCAGGCTTCTAAAGCTTGAATGGTTCAGCATGGAATAATAAGA  
TAGGACTTCGGTTTTAAATTTTGGTTGGCTATAGAACCAAAGTAATGATTGAAAGGGATAGTT  
GGGGTGTAGTATTGGGTGGTCAGCGGTGAAATGCTCAGACCCACTCAAGACTAACTTA  
TGCGAAAGCATTCACCAAGGATATCTTCT

>C055\_04

AGCTCCAATAGCGTATATTAAGTTGTTGCAGTTAAAAGGCTCGTAGTCAACTTATGAC  
CCTGCGAACCTGGCCCGTCTCAAGTAGTGCAGTGCCTGGTGTGCGCGGGTCATCTTCC  
GAAGAGCACCTCTGCCCTTGATTGGGTTGGTGTGTGTAATTTGGTGCATTTACTGTGAGTA



AATCAAAGTGTTCAAAGCAAGCTTCAAAGCTTGAATGGTTCAGCATGGAATAATAAGAT  
AGGGCTTCGGTTTTATTTTGGTGGCTATAGAACCAAAGTAATGATTGAAAGGGATAGTTG  
GGGGTGTAGTATTGGGTGGTCAGCGGTGAAATGCGTAGACCCACTCAAGACTAACTTAT  
CGAAAGCATTACCAAGGATATCTTCT

>C056\_01

AGCTCCAGTAGCGTATATTAAGTTGTTGCAGTTAAAAGGCTCGTAGTCGAACCTTATGGC  
CTTGTGGACCTGGCCCCTTCTCTAGTAGGACGAGTGCCGGTGTTCACGGGTCATCCTTCC  
GAAGACCCTTCTGCCCTTGATTGGGTTGGTGTGTAAATTTGGTACTTTTACTGTGAGT  
AAATCAAAGTGTTCAAAGCAGGCTTTAAAGCTTGAATGGTTCAGCATGGAATAATAAGAT  
AGGACTTTGGTTTTATTTTGGTGGCTGTGAAACCAAAGTAATGATTGAAAGGGATAGTTGG  
GGGTGCTAGTATTGGATGGTCAGCGGTGAAATGCATGGACCCATTCAAGACTAACTTATG  
CGAAAGCATTACCAAGGATATCTTCT

>C057\_03

AGCTCCAGTAGCGTATATTAAGTTGTTGCAGTTAAAAGGCTCGTAGTCGAATTTATGGC  
TTTGTGAACCTGGCCCCTTCTCTAGTAGGACGAGTGCCGGTGTGCACGGGTCATCCTTCC  
GAAGAGCACTTCTGCCCTTGATTGGGTTGGTCGTGTAATTTGGTACGTTTACTGTGAGTA  
AATCAAAGTGTTCAAAGCAGGCTTTGACGCTTGAATGGTTCAGCATGGAATAATAAGAT  
AGGACTTTGGTTTTATTTTGGTGGCTGTGGAACCGAAGTAATGATTGAAAGGGATAGTT  
GGGGTGTAGTATTGTATGGTCAGCGGTGAAATGCATGGACCCATTCAAGACTAACTTA  
TGCGAAAGCATTACCAAGGATATCTTCT

>C058\_01

AGCTCCAGTAGCGTATATTAAGTTGTTGCAGTTAAAAGGCTCGTAGTCGAACCTTATGGC  
CCTGTGAACCTGACCCGCTCTCTAGTAGGGCGAGCGTCCGGTGTGCACGGGTCATCCTTCC  
GAAGAGCACTTCTGCCCTTGATTGGGTTGGCTGTGTAATTTGGTGCATTTACTGTGAGTA  
AATCAAAGTGTTCAAAGCAAGCTTTAATGCTTGAATGGTTCAGCATGGAATAATAAGATA  
GGACTTCGGTTTTGTTTTGTTGGCTATAGAACCAAAGTAATGATTGACAGGGATAGTTGG  
GGGTGCTAGTATTGTATGGTCAGCGGTGAAATGCATAGACCCATGCAAGACTAACTTATG  
CGAAAGCATTACCAAGGATATCTTCT

>C059\_01

AGCTCCAGTAGCGTATATTAAGTTGTTGCAGTTAAAAGGCTCGTAGTCGAATTTATGGC  
CCTGTGAACCTGGCCCCTCTCTAGTAGGGCGAGTGCCGGTGTGCACGGGTCATCCTTCC  
GAAGAGCACTTCTGCCCTTGATTGGGTTGGATGTGTAATTTGGTGCATTTACTGTGAGTA  
AATCAAAGTGTTCAAAGCAAGCTTTAATGCTTGAATGGTTCAGCATGGAATAATAAGATA  
GGACTTCGGTTTTGTTTTGTTGGCTATAGAACCAAAGTAATGATTGAAAGGGATAGTTGG  
GGGTGCTAGTATTGGATGGTCAGCGGTGAAATGCATGGACCCATTCAAGACTAACTTATG  
CGAAAGCATTACCAAGGATATCTTCT

>C060\_01

AGCTCCAATAGCGTATATTAAGTTGTTGCAGTTAAAAGGCTCGTAGTCGAACCTTATGGC  
CCTGTGAACCTGGCCCCTCTCTAGTAGGGCGAGTGCCGGTGTTCACGGGTCATCCTTCC  
GAAGAGCACTTCTGCCCTTGATTGGGTTGGTCGTGTAATTTGGTGCATTTACTGTGAGTA  
AATCAAAGTGTTCAAAGCAAGCTTTAATGCTTGAATGGTTCAGCATGGAATAATAAGATA  
GGACTTCGGTTTTATTTTGGTGGCTATAGAACCAAAGTAATGATTGAAAGGGATAGTTGG  
GGGTGCTAGTATTGGATGGTCAGCGGTGAAATGCATGGACCCATTCAAGACTAACTTATG  
CGAAAGCATTACCAAGGATATCTTCT

>C061\_03

AGCTCCAGTAGCGTATATTAAGTTGTTGCAGTTAAAAGGCTCGTAGTCGAACCTTATGGC  
CCTGTGAACCTGGCCCCTCTCTAGTAGGGCGAGCGCCGGTGTTCACGGGTCATCCTTCC  
GAAGAGCACTTCTGCCCTTGATTGGGTTGGTGTGTAAATTTGGTACATTTACTGTGAGTA  
AATCAAAGTGTTCAAAGCAAGCTTTAATGCTTGAATGGTTCAGCATGGAATAATAAGATA  
GGACTTTGGTTTTGTTTTGTTGGCTATAGAACCAAAGTAATGATTGAAAGGGATAGTTGGG  
GGTGTAGTATTGGATGGTCAGCGGTGAAATGCATGGACCCATTCAAGACTAACTTATGC  
GAAAGCATTACCAAGGATATCTTCT

>C062\_01

AGCTCCAGTAGCGTATATTAAGTTGTTGCAGTTAAAAGGCTCGTAGTCGAACCTTATGGC  
CCTGTGAACCTGACCCACCCCTAGTGGGTGAGTGTCCGGTGTGCACGGGTCATCTTTCTGG  
AGAGCACTTTCTGCCCTTGATTGGGTTGGTGTGTAAATTCGGATCATTTACTGTGAGTAA  
ATCAAAGTGTTCAAAGCAGGCTTTACAGCTTGAATGGTTCAGCATGGAATAATAAGATAG  
GACTTCGGTTCAATTTGTTGGCTATACGAACCAAAGTAATGATTGATAGGGATGGTTGGG  
GGTGTAGTATTGGGCGGTGAGCGGTGAAATGCATGGACCCGTTCAAGACTAACTTATGC  
GAAAGCATTACCAAGGACATCTTCT

>C063\_02

AGCTCCAGTAGCGTATATTAAGTTGTTGCAGTTAAAAGGCTCGTAGTCGAACCTTATGGC  
CCTGTGAACCTGGCCTACTCTCTAGTGGAGTAAGTGTCCGGTGTGCACGGGTCATCTTTCT  
GGAGAGCACTTCTGCCCTTGATTGGGTTGGTGTGTAAATTCGGATCATTTACTGTGAGTA

AATCAAAGTGTTCAAAGCAGGCTTTACAGCTTGAATGGTTCAGCATGGAATAATAAGATA  
GGACTTCGGTTCATACTTGTGGCTATACGAATCAAAGTAATGATTGATAGGGATGGTTG  
GGGGTGTAGTATTGGGTGGTCAGCGGTGAAATGCATGGACCCATCTAAGACTAACTTAT  
GCGAAAGCATTACCAAGGACATCTTCT

>C064\_03

AGCTCCAGTAGCGTATATTAAGTTGTTGCAGTTAAAAGGCTCGTAGTCGAACTTATGGC  
CCAGTGAACCTGGCCCCTTCCCTAGTGGAGCGAGTGTGCGGTGTCACGGGTCATCTTTCT  
GAAGAGCACTTCTGCCCTTGATTGGTGTGGTTGTGCGATTGGATCATTTACTGTGAGT  
AAATCAAAGTGTTCAAAGCAGGCTTGACAGCTTGTATGGTTCAGCATGGAATAATAAGAT  
AGGACTTCGGTTCATACTTGTGGCTATAAGGACCAAAGTAATGATTAATAGGGATAGTT  
GGGGTGTAGTATTGGGCGGTGAGCGGTGAAATGCATGGACCCGTTCAAGACTAACTTA  
TGCGAAAGCATTACCAAGGATATCTTCT

>C065\_02

AGCTCCAGTAGCGTATATTAACGTTGTTGCAGTTAAAAGGCTCGTAGTCGAACTTATGGC  
CCTGTGAACCTGGCCCCTCTCTAGTAGAGTGTGCGTGTGCGGTGTCACGGGTCATCTTTCT  
GGAAAGCACYTCTGCCCTTGATTGGGTGGTTGTGTAATTCGATCATTACTGTGAGTA  
AATCAAAGTGTTCAAAGCAGGCTTTATAGCTTGAATGGTTCAGCATGGAATAATAAGATA  
GGACTTCGGTTCATACTTGTGGCTATACGAACCAAAGTAATGATTGATAGGGATGGTTG  
GGGGTGTAGTATTGGGCGGTGAGCGGTGAAATGCATGGACCCGTTCAAGACTAACTTA  
GCGAAAGCATTACCAAGGACATCTTCT

>C066\_02

AGCTCCAGTAGCGTATATTAACGTTGTTGCAGTTAAAAGGCTCGTAGTCGAACTTATGGC  
CCTGTGAACCTGGCCCCTCCACGGAGGTGAGTGTGCGGTGTCACGGGTCATCTTTCT  
GGAGAGCACTTCTGCCCTTGATTGGGTGGTTGTGTAATTCGATCATTACTGTGAGTA  
AATCAAAGTGTTCAAAGCAGGCTTTATAGCTTGAATGGTTCAGCATGGAATAATAAGATA  
GGGCTTCGGTTCATACTTGTGGCTATACGAACCAAAGTAATGATTGATAGGGATGGTTG  
GGGGTGTAGTATTGGGCGGTGAGCGGTGAAATGCATGGACCCGTTCAAGACTAACTTA  
GCGAAAGCATTACCAAGGACATCTTCT

>C067\_02

AGCTCCAGTAGCGTATATTAAGTTGTTGCAGTTAAAAGGCTCGTAGTCGAACTTATGAC  
CCTGTGAACCTGGCCCCTTCTCGGAATGTGTGTCGGTGTGAGCGGGTCATCTTTCTGGA  
AAGACTTCTGCCCTTGATTGGGTGGTTCGGGTGATTTCGATCATTACTGTGAGTAAAT  
CAAAGTGTTCAAAGCAGGCTTCGGCTTGAATGGTTCAGCATGGAATAATAAGATAGGACT  
TCGGTTCATACTTGTGGCTATACGAACCAAAGTAATGATTATAGGGATGGTTGGGGT  
GCTAGTATTGAGCGGTGAGCGGTGAAATGCATGGACCCGTTCAAGACTAACTTATGCGAA  
AGCATTACCAAGGACATCTTCT

>C068\_01

AGCTCCAGTAGCGTATATTAAGTTGTTGCAGTTAAAAGGCTCGTAGTCGAACTTATGGC  
CCTGTGAACCTGACCCGCTCTCTAGTAGAGTGAGCGTGTGCGGTGTCACGGGTCATCTTTCT  
GAAGAGCACTTCTGCCCTTGATTGGGTGGTTGTGTAATTTGGATCATTACTGTGAGTA  
AATCAAAGTGTTCAAAGCAGGCTTTACAGCTTGTATGGTTCAGCATGGAATAATAAGATA  
GGACTTCGGTTCATACTTGTGGCTATAAGAACCAAAGTAATGATTATAGGGATAGTTG  
GGGGTGTAGTATTGGGCGGTGAGCGGTGAAATGCATGGACCCGTTCAAGACTAACTTAT  
GCGAAAGCATTACCAAGGATATCTTCT

>C069\_01

AGCTCCAGTAGCGTATATTAAGTTGTTGCAGTTAAAAGGCTCGTAGTCGAACTTATGGC  
CCTGTGAACCTGGCCCATTCTCTAGTAGAGTGAGTGTGCGGTGTCACGGGTCATCTTTCT  
GGAGAGCACTTCTGCCCTTGATTGGGTGGTTGTGTAATTCGGATCATTACTGTGAGTA  
AATCAAAGTGTTCAAAGCAGGCTTTATAGCTTGAATGGTTCAGCATGGAATAATAAGATA  
GGACTTCGGTTCATACTTGTGGCTATAAGAACCAAAGTAATGATTGATAGGGATAGTTG  
GGGGTGTAGTATTGGGTGGTTCAGCGGTGAAATGCATGGACCCATTCAAGACTAACTTAT  
GCGAAAGCATTACCAAGGATATCTTCT

>C070\_02

AGCTCCAGTAGCGTATATTAAGTTGTTGCAGTTAAAAGGCTCGTAGTCGAACTTATGGC  
CCTGTGAACCTGGCCCATTCTCTAGTAGAGTGAGTGTGCGGTGTCACGGGTCATCTTTCT  
GAAGAGCACTTCTGCCCTTGATTGGGTGGTYGTGTAATTTAGATCATTACTGTGAGTA  
AATCAAAGTGTTCAAAGCAGGCTTTAYAGCTTGAATGGTTCAGCATGGAATAATAAGATA  
GGACTTCGGTTCATACTTGTGGCTATAMGAACCAAAGTAATGATTGATAGGGATGGTTG  
GGGGTGTAGTATTGGGCGGTGAGCGGTGAAATGCATGGACCCGTTCAAGACTAACTTAT  
GCGAAAGCATTACCAAGGACATCTTCT

>C071\_07

AGCTCCAGTAGCGTATATTAAGTTGTTGCAGTTAAAAGGCTCGTAGTCGAACTTATGGC  
CCTGTGAACCTGRCCACTCTCTAGTGGAGTGAGYGTGCGGTGTCACGGGTCATCTTTCT  
GGAGAGCACTTCTGCCCTTGATTGGGTGGTTGTGTAATTCGATCATTACTGTGAGTA

AATCAAAGTGTTCAAAGCAGGCTTTAYAGCTTGAATGGTTCAGCATGGAATAATAAGATA  
GGACTTCGGTTCATACTTGTGGCTATACGAACCAAAGTAATGATTGATAGGGATGGTTG  
GGGGTGCATAGTATTGGGCGGTGAGCGGTGAAATGCATGGACCCGTTCAAGACTAACTTAT  
GCGAAAGCATTACCAAGGACATCTTCT

>C072\_210

AGCTCCAAAAGCGTATATTTAAAATTGTTGCAGTTAAAAGCTCGTAGTCTGAATTTATGAT  
CACGTGGATCCAGCCCATCTCCTAGTGGGGTGCCTGTTGGTGAGACAGATCATATCTCTG  
AAGAGCACTTCTGCCCTTGATTGGGTGGTGTGTGATTCCGGAGCATTACTGTGAACAAA  
TCAAAGTGTTCAAAGCAGGCATCACGCTTGAATGGTTCAGCATGGAATAATAAGATAAGG  
CTTCGGTTTTGTCTTGTGGCTATATAACCAAAGTAATGATTAATAGGGATGTTTGGGGG  
TGCTAGTATTCAGTGGTTAGCGGTGAAATGCGATGACCCATTGAAGACTGACTAATGCGA  
AAGCATTACCAAGGGCATTCTTCT

>C073\_24

AGCTCCAAAAGCGTATATTTAAAATTGTTGCAGTTAAAAGCTCGTAGTCTAAGTGTGAT  
CACGTGGATCCAGCCCATCTCCTAGTGGGGTGCCTGTTGGTGAGACAGATCATTTCTCTG  
AAGAGCGCTTCTGCCCTTGATTGGGTGGTGTGTGATTTGGAGCATTACTGTGAACAAA  
TCAAAGTGTTCAAAGCAGGCATTACGCTTGAATGGTTCAGCATGGAATAATAAGATAAGG  
CTTCGGTTTTGTCTTGTGGCTATATGACCAAAGTAATGATTAATAGGGATGTTTGGGGG  
TGCTAGTATTCAGTGGTTAGCGGTGAAATGCGATGACCCATTGAAGACTGACTAATGCGA  
AAGCATTACCAAGGGCATTCTTCT

>T001\_04

AGCTCCAATAGCGTATGCTAAAGTTGTTGCAGTTAAAAGGCTCGTAGTCTGAACCTTATGAC  
TATGTCGCACCCGACTCATCCTCTCGAAGGGTGGCGCCGGTGTGCACAGGTCATTTTTCT  
GGAAAGCAATTTCTGCCCTTCACTGGGTGGTCTTGTAAATCCAGATCATTACTGTGAGAA  
AATCAGAGTGTTCAAAGCAGGCTTTATGCTTGTATGGTTCAGCATGGAATAATAAGATAA  
GACTTCGGTTTTATTTTGTGGCTATGAAACCAAAGTAATGATTGAAAGGGATAGTTGGG  
GGTGCATGATTTCAGTGGTTCAGCGGTGAAATGCGAGGACCCATTGAAGACTAAGTATG  
GAAAGCATTACCAAGGATATCTTCT

>T002\_02

AGCTCCAATAGCGTATGCTAAAGTTGTTGCAGTTAAAAGGCTCGTAGTCTGAACCTTATGAC  
TATGTCGCACCCGACTCATCCTCTCGAAGGGTGGCGCCGGTGTGCACAGGTCATTTTTCT  
GGAAAGCAATTTCTGCCCTTCACTGGGTGGTCTTGTAAATCCAGATCATTACTGTGAGTA  
AATCAGAGTGTTCAAAGCAGGCTTTATGCTTGTATGGTTCAGCATGGAATAATAAGATAA  
GACTTCGGTTTTATTTTGTGGCTATGAAACCAAAGTAATGATTGAAAGGGATAGTTGGG  
GGTGCATGATTTCAGTGGTTCAGCGGTGAAATGCGAGGACCCATTGAAGACTAAGTATG  
GAAAGCATTACCAAGGATATCTTCT

>T003\_01

AGCTCCAATAGCGTATGCTAAAGTTGTTGCAGTTAAAAGGCTCGTAGTCTGAACCTTCTGAC  
CTGGTGAACCCAGTCCATGCTCTAGTAGTGTGCGTACTGTTGTGTGCACGGGTCACTTCT  
TGCGAAAAGCATCGCTGCCCTTGAGTGGGTGGCAAATGTAATTCGCATCATTACTGTG  
AGTAAATCAAAGTGTTCAAAGCAGGCATCTTGTCTGTATGGTTCAGCATGGAATAATA  
AGATAAGACTTTGGTCTTTATTTTGTGGCTTCTAGAACCAAAGTAATGATTGAAAGGGGA  
TAGTTGGGGTGCTAGTATTGAATGGTTAGCGGTGAAATGCGAGGACCCATTTAAGACTA  
ACTTATGCGAAAAGCATTACCAAGGATATCTTCT

>T004\_01

AGCTCCAATAGCGTATGCTAAAGTTGTTGCAGTTAAAAGGCTCGTAGTCTGAACCTTCTGAC  
TCTGATGAACCCGGTCCATCCTCTAGTAGGATGTGTGCTGGTGTGCACGGGTCACTTCT  
TGAAAGTGTCTTCTGCCCTTGATTGGGTGGTCTTGTAAATCCAGATCAATTACTGTGAGT  
AAATCAAAGTGTTCAAAGCAGGCATCTTGCCTGAATGGTTCAGCATGGAATAATAAGAT  
AAGACTTCGGTTTTATTTTGTGGCTATGAAACCAAAGTAATGATTGAAAGGGATAGTTG  
GGGTGCTAGTATTTCAGTGGTTCAGCGGTGAAATGCGAGGACCCATTGAAGACTAAGTAT  
GCGAAAAGCATTACCAAGGATATCTTCT

>T005\_01

AGCTCCAATAGCGTATGCTAAAGTTGTTGCAGTTAAAAGGCTCGTAGTCTGAACCTTTTGGC  
CTTTGAGAACCTAGCCATACTCTAGTAGTATGTGTGCTGGTGTGCTCGGGCCATTCTTC  
TGAGGAGTGTCTCTGCCCTTGATTGGGTGGTCTTACGATTTCAGATCATTACTGTGAGA  
AAATCAAAGTGTTCAAAGCAGGCTTCAACGCTTGTATGGTTCAGCATGGAATAATAAGAT  
AGGACTTCGGTTTTATTTTGTGGCTATGAAACCAAAGTAATGATTGAAAGGGATAGTTG  
GGGTGCTAGTATTTCAGTGGTTCAGCGGTGAAATGCGAGGACCCATTGAAGACTAAGTAT  
GCGAAAAGCATTACCAAGGATATCTTCT

>T006\_03

AGCTCCAAAAGCGTATGCTAAAGTTGTTGCAGTTAAAAGGCTCGTAGTCTGAACCTGTGAT  
CCTTGAGAACCCAGTCCATCTCTAGTAGAATGTGCACTGGTGTGCTCGGGTCATACTTC  
TGGAGAGCGTTCTGCCCTTGATTGGGTGGTCTCGTAATTCAGATCATTACTGTGAGT

AAATCAAAGCGTTCAAAGCAGGCTTCAATGCTTGTATGGTTCAGCATGGAATAATAAGAT  
AAGACTTCGGTCTTGTGTTTGGCTATAAGACCAAAGTAATGATTGAAAGGGATAGTTG  
GGGGTGTAGTATTAGTGGTCAGCGGTGAAATGCGAAGACCCATTGAAGACTAACTTAT  
GCGAAAGCATTACCAAGGATATCTTCT

>T007\_04

AGCTCCAATAGCGTATGCTAAAGTTGTTGCAGTTAAAAGGCTCGTAGTCGAACTTATGGC  
CTTTGAGACCTGGTCCACCCCTAGGGGTGCGTACTGGTGTGCCCGGGTCATTCTTCTGA  
AAAGCGTCTCTGCTCTTGATTGAGTTGGTTTTCGTAATTCAGATCATTTACTGTGAGAAAA  
TCAAAGTGTCAAAGCAGGCTTAAATGCTTGTATGGTTCAGCATGGAATAATAAGATAGG  
GCTTCGGTTTTATTTTGTGGCTATATAACCAAAGTAATGATTGATAGGGATAGTTGGGG  
GTGCTAGTATTCAATGGTCAGCGGTGAAATGCGTAGACCCATTGAAGACTAACTTATGCG  
AAAGCATTACCAAGGATATCTTCT

>T008\_03

AGCTCCAATAGTATATGCTAAAGTTGTTGCAGTTAAAAGGCTCGTAGTCGAACTTATGAC  
TTTTGAGAACCCTGGCCACCTCTTCTCGAGGTGCGTGCTGGTGTGCTCAGGTCATTCTTC  
TGAGGAGCGCTTCTGCCCTTGATTGGGTTGGTTGTGTAATTCAGATCATTTACTGTGAGA  
AAATCAAAGTGTCAAAGCAGGCTTAAACGCTTGTATGGTTCAGCATGGAATAATAAGAT  
AGGACTTCGGTCTCATTTTGTGGCTATAGACCAAAGTAATGATTGATAGGGATAGTTGG  
GGGTGCTAGTATTGATGGTCAGTGGTAAATGCACAGACCCATTGAAGACTAACTTATG  
CGAAAGCATTACCAAGGATATCTTCT

>T009\_01

AGCTCCAATAGCGTATGCTAAAGTTGTTGCAGTTAAAAGGCTCGTAGTCGAACTTGTGTC  
CCTTGAGAACCCTGGCCACCTTCTCGTAAGGTGCGTGCCGGTGTCTCGGGTCATTCTTC  
TGAAAAGCGCTTCTGCCCTTGATTGGGTCGGTTGTGTGATTTCAGATCATTTACTGTGAGA  
AAATCAAAGTGTCAAAGCAGGCTTCAACGCTTGTATGGTTCAGCATGGAATAATAAGAT  
AAGACTTCGGTTTTGTTTTGTGGCTATATAACCAAAGTAATGATTGAAAGGGATAGTTG  
GGGGTGTAGTATTGATGGTCAGCGGTGAAATGCGTAGACCCATTGAAGACTAACTTAT  
GCGAAAGCATTACCAAGGATATCTTCT

>T010\_02

AGCTCCAATAGCGTATGCTAAAGTTGTTGCAGTTAAAAGGCTCGTAGTCGAACTTTTGAT  
CCTTGAGAACCCTGCCCATCTTCTAGTAAGGTGTGTGCGGGTGTCTCGGGTCATTCTTC  
TGAAGGCRCTTCTGCCCTTGATTGGGTTGGTTGTGTGATTTCAGATCATTTACTGTGAGA  
AAATCAAAGTGTCAAAGCAGGCTTCAACGCTTGTATGGTTCAGCATGGAATAATAAGAT  
AAGACTTCGGTTTTATTTTGTGGCTATATGACCAAAGTAATGATTGAAAGGGATAGTTG  
GGGGTGTAGTATTCAATGGTCAGCGGTGAAATGCGTAGACCCATTGAAGACTAACTTAT  
GCGAAAGCATTACCAAGGATATCTTCT

>T011\_01

AGCTCCAATAGCGTATGCTAAAGTTGTTGCAGTTAAAAGGCTCGTAGTCGAACTTTGTGTC  
CTTTGAGAACCCTGGTCCATCTTCTAGTAAGGTGTGCACCGGTGTGCTCGGGTCATACTTC  
TAAAAGCGCTTCTGCCCTTGATTGGGTTGGTTGTGTGATTTCAGATCATTTACTGTGAAA  
AAATCAAAGTGTCAAAGCAGGCTTAAACGCTTGTATGGTTCAGCATGGAATAATAAGAT  
AAGGCTTCGGTTTTATTTTGTGGCTATATAACCAAAGTAATGATTGAAAGGGATAGTTG  
GGGGTGTAGTATTCAATGGTCAGCGGTGAAATGCGTAGACCCATTGAAGACTAACTTAT  
GCGAAAGCATTACCAAGGATATCTTCT

>T012a\_08

AGCTCCAATAGCGTATGCTAAAGTTGTTGCAGTTAAAAGGCTCGTAGTCGAACTTGTGGC  
CTTTGAGAACCCTGGTCCATCTTCTAGTAAGGTGTGTACTGGTGTGCTCGGGTCATACTTC  
TGAAAAGCGCTTCTGCCCTTGATTGGGTTGGTTGTGTGATTTCAGATCATTTACTGTGAGT  
AAATCAAAGCGTTCAAAGCAGGCTTCAATGCTTGTATGGTACAGCATGGAATAATAAGAT  
AAGACTTCGGTTTTGTTTTGTGGCTATATAACCAAAGTAATGATTGATAGGGATAGTTG  
GGGGTGTAGTATTCAATGGTCAGCGGTGAAATGCGTAGACCCATTGAAGACTAACTTAT  
GCGAAAGCATTACCAAGGATATCTTCT

>T012b\_02

AGCTCCAATAGCGTATGCTAAAGTTGTTGCAGTTAAAAGGCTCGTAGTCGAACTTGTGGC  
CTTTGAGAACCCTGGTCCATCTTCTAGTAAGGTGTGCACCGGTGTGCTCGGGTCATACTTC  
TGAAAAGCGCTTCTGCCCTTGATTGGGTTGGTTGTGTGATTTCAGATCATTTACTGTGAGT  
AAATCAAAGCGTTCAAAGCAGGCTTAAATGCTTGTATGGTACAGCATGGAATAATAAGAT  
AAGACTTCGGTTTTGTTTTGTGGCTATATAACCAAAGTAATGATTGATAGGGATAGTTG  
GGGGTGTAGTATTCAATGGTCAGCGGTGAAATGCGTAGACCCATTGAAGACTAACTTAT  
GCGAAAGCATTACCAAGGATATCTTCT

>T012c\_02

AGCTCCAATAGCGTATGCTAAAGTTGTTGCAGTTAAAAGGCTCGTAGTCGAACTTGTGGC  
CCTTGAGAACCCTAGTCCATCTTCTAGTAAGGTGTGCACCTGGTGTGCTCGGGTCATACTTC  
TGAAAAGCGCTTCTGCCCTTGATTGGGTTGGTTGTGTGATTTCAGATCATTTACTGTGAGT

AAATCAAAGCGTTCAAAGCAGGCTTCAATGCTTGTATGGTACAGCATGGAATAATAAGAT  
AAGACTTCGGTTTTGTTTTGTTGGCTATATAACCAAAGTAATGATTGATAGGGATAGTTG  
GGGGTGTAGTATTAGTGGTCAGCGGTGAAATGCGAAGACCCATTGAAGACTAACTTAT  
GCGAAAGCATTACCAAGGATATCTTCT

>T013\_02

AGCTCCAATAGCGTATGCTAAAGTTGTTGCAGTTAAAAGGCTCGTAGTCGAACTTCTGGC  
CCTGATGAACCTGGCCCATCCTCTAGTAGGATGCGTGCTGGTGTGCACGGGTCATTCTTC  
TGGAAGCGCTTCTGCCCTTAATTGGGTYGGTGTGTAATTCAGATCATTTACTGTGAGT  
AAATCAAAGTGTCAAAGCAGGCTTAAATGCTTGTATGGTTCAGCATGGAATAATAAGAT  
AGGACTTCGGTTTTGTTTTGTTGGCTATATAACCAAAGTAATGATTGAAAGGGATAGTTG  
GGGGTGTAGTATTGGATGGTCAGCGGTGAAATGCGTGGACCCATTCAAGACTAACTTAT  
GCGAAAGCATTACCAAGGATATCTTCT

>T014\_01

AGCTCCAATAGCGTATGCTAAAGTTGTTGCAGTTAAAAGGCTCGTAGTCGAACTTCTGGC  
CCTGATGAACCTAGCCATTCTCTAGTAGAATGTGTGCTGGTGTGCACGGGTCATTCTTC  
TGGAAGCGTTTTCTGCCCTTGATTGGGTTGGTCTCGTAATTCAGATCATTTACTGTGAGT  
AAATCAAAGTGTCAAAGCAGGCTTAAATGCTTGTATGGTTCAGCATGGAATAATAAGAT  
AGGACTTCGGTTTTGTTTTGTTGGCTATATAACCAAAGTAATGATTGAAAGGGATAGTTG  
GGGGTGTAGTATTGGATGGTCAGCGGTGAAATGCGTGGACCCATTCAAGACTAACTTAT  
GCGAAAGCATTACCAAGGATATCTTCT

>T015\_01

AGCTCCAATAGCGTATGCTAAAGTTGTTGCAGTTAAAAGGCTCGTAGTCGAACTTCTGGC  
CTTGATGAACCTGGCCATCCTTTGATGTGTGCTGGTGTTCGCGGTCATTCTTCTGGAA  
AGGCTTTCTGCTCCTTTACTGGATCGGTTGCGTAATTCGGATCATTACTGTGAGTAAATC  
AAAGTGTCAAAGCAGGCTTAAATGCTTGTATGGTTCAGCATGGAATAATAAGATAGGAC  
TTCGGTCTGTTTTGTTGGCTATATGACCAAAGTAATGATTGAAAGGGATAGTTGGGGGT  
GCTAGTATTGGATGGTCAGCGGTGAAATGCGTGGACCCATTCAAGACTAACTTATGCGAA  
AGCATTACCAAGGATATCTTCT

>T016\_01

AGCTCCAATAGCGTATGCTAAAGTTGTTGCAGTTAAAAGGCTCGTAGTCGAACTTCTGAC  
CCTGATGAACCTGGCCCATCCTCTAGTAGGGTGCCTGCTGGTGTGCACGGGTCATTCTTC  
TGGAAGCATTCTTCCCTTGATTGGGCTGGTCTTGTAAATTCAGATCATTTACTGTGAGT  
AAATCAAAGTGTCAAAGCAGGCTTAAACGCTTGTATGGTTCAGCATGGAATAATAAGAT  
AGGACTTTGGTTTTATTTGTTGGCTATATGACCAAAGTAATGATTGAAAGGGATAGTTG  
GGGGTGTAGTATTGGATGGTCAGCGGTGAAATGCGTGGACCCATTCAAGACTAACTTAT  
GCGAAAGCATTACCAAGGATATCTTCT

>T017a\_05

AGCTCCAATAGCGTATGCTAAAGTTGTTGCAGTTAAAAGGCTCGTAGTCGAACTTCTGGC  
TCTGATGAACCCGGCCCATCCTCTAGTAGGGTGTGTGCTGGTGTGCACGAGTCATTCTTC  
TGGAAGCGTCTCTGCCCTTGATTGGGTTGGTTTTGTAATTCAGATCATTTACTGTGAGT  
AAATCAAAGTGTCAAAGCAGGCTTCAATGCTTGTATGGTTCAGCATGGAATAATAAGAT  
AGGACTTCGGTTTTGTTTTGTTGGCTATATGACCAAAGTAATGATTGAAAGGGATAGTTG  
GGGGTGTAGTATTGGATGGTCAGCGGTGAAATGCGTGGACCCATTCAAGACTAACTTAT  
GCGAAAGCATTACCAAGGATATCTTCT

>T017b\_01

AGCTCCAATAGCGTATGCTAAAGTTGTTGCAGTTAAAAGGCTCGTAGTCGAACTTCTGGC  
TCTGATGAACCTGGCCCATCCTCTAGTAGGGTGTGTGCTGGTGTGCACGAGTCATTCTTC  
TGGAAGCATTCTTCTGCCCTTGATTGGGTTGGTTTTGTAATTCAGATCATTTACTGTGAGT  
AAATCAAAGTGTCAAAGCAGGCTTAAATGCTTGTATGGTTCAGCATGGAATAATAAGAT  
AGGACTTCGGTTTTGTTTTGTTGGCTATATAACCAAAGTAATGATTGAAAGGGATAGTTG  
GGGGTGTAGTATTGGATGGTCAGCGGTGAAATGCGTGGACCCATTCAAGACTAACTTAT  
GCGAAAGCATTACCAAGGATATCTTCT

>T017c\_01

AGCTCCAATAGCGTATGCTAAAGTTGTTGCAGTTAAAAGGCTCGTAGTCGAACTTCTGGC  
TCTGATGAACCTGGCCCATCCTCTAGTAGGGTGCCTGCTGGTGTGCACGAGTCATTCTTC  
TGGAAGCTTCTCTGCCCTTGATTGGGTTGGTTTAGTAATTCAGATCATTTACTGTGAGT  
AAATCAAAGTGTCAAAGCAGGCTTCAATGCTTGTATGGTTCAGCATGGAATAATAAGAT  
AGGACTTCGGTTTTGTTTTGTTGGCTATATAACCAAAGTAATGATTGAAAGGGATAGTTG  
GGGGTGTAGTATTGGATGGTCAGCGGTGAAATGCGTGGACCCATTCAAGACTAACTTAT  
GCGAAAGCATTACCAAGGATATCTTCT

>T018\_01

AGCTCCAATAGCGTATGCTAAAGTTGTTGCAGTTAAAAGGCTCGTAGTCGAACTTATGGC  
TCAGTTGAACCTAGCCACCCTCTAGTAGGGTGCCTGCTGGTGTGCACGGGCCATTCTTC  
TGGAAGCGCTTCTGCCCTTGATTGGGTTGGTGTGTAATTCAGATCATTTACTGTGAGT

AAATCAAAGTGTTCAAAGCAGGCTTAAATGCTTGTATGGTTCAGCATGGAATAATAAGAT  
AGGACTTCGGTTTTATTTTGTGGCTATATAACCAAAGTAATGATTGAAAGGGATAGTTG  
GGGGTGTAGTATTGGATGGTCAGCGGTGAAATGCATGGACCCATTCAAGACTAACTTAT  
GCGAAAGCATTACCAAGGATATCTTCT

>T019\_01

AGCTCCAATAGCGTATGCTAAAGTTGTTGCAGTTAAAAGGCTCGTAGTCGAACTTATGGC  
CTTGTTGAACCTGACCCATCCTCTAGTAGGATGTGTGTCGGTGTGCACGGGCCATTCTTC  
TGGAAGCGCTTCTGCCCTTGATTGGGTTGGTTGTGTAATTCAGATCATTTACTGTGAGT  
AAATCAAAGTGTTCAAAGCAGGCTTAAATGCTTGTATGGTTCAGCATGGAATAATAAGAT  
AGGACTTTGGTTTTATTTTGTGGCTATATGACCAAAGTAATGATTGAAAGGGATAGTTG  
GGGGTGTAGTATTGGATGGCCAGCGGTGAAATGCGTGGACCCATTCAAGACTAACTTAT  
GCGAAAGCATTACCAAGGATATCTTCT

>T020\_01

AGCTCCAATAGCGTATGCTAAAGTTGTTGCAGTTAAAAGGCTCGTAGTCGAACTTATGAC  
CCTGATGAACCTGGCCCATCCTCTAGTAGGATGTGTGCTGGTGTGCACGGGTCATTCTTC  
TGGAAGCGCTTCTGCCCTTGATTGGGTTGGTTGTGTAATTCAGATCATTTACTGTGACA  
AAATCAAAGTGTTCAAAGCAGGCTTAAACGCTTGTATGGTTCAGCATGGAATAATAAGAT  
AGGACTTCGGTTTTATTTTGTGGCTATATGACCAAAGTAATGATTGAAAGGGATAGTTG  
GGGGTGTAGTATTGGATGGTCAGCGGTGAAATGCGTGGACCCATTCAAGACTAACTTAT  
GCGAAAGCATTACCAAGGATATCTTCT

>T021\_01

AGCTCCAATAGCGTATGCTAAAGTTGTTGCAGTTAAAAGGCTCGTAGTCGAACTTATGGC  
TCTGATGAACCTGGCCCATCCTCTAGTAGGATGTGTGCTGGTGTGCACGGGTCATTCTTC  
TGGAAGCGCTTCTGCCCTTGATTGGGTTGGTTGTGTAATTCAGGTCATTTGCCTTGAGT  
AAATCACAGTGTTCAAAGCAGGCTTAAATGCTTGTATGGTTCAGCATGGAATAATAAGAT  
AGGACTTCGGTTTTATTTTGTGGCTATAAAAACCAAAGTAATGATTGAAAGGGATAGTTG  
GGGGTGTAGTATTGGATGGTCAGCGGTGAAATGCGTGGACCCATTCAAGACTAACTTAT  
GCGAAAGCATTACCAAGGATATCTTCT

>T022\_02

AGCTCCAATAGCGTATGCTAAAGTTGTTGCAGTTGAAAGGCTCGTAGTCGAACTTCTGAC  
CCTGATGAACCTGGTCCATCCTCTAGGGGATGTGTGCTGGTGTGCACGGGTCATTCTTCT  
GGAAAGCGCTTCTGCCCTTGATTGGGTTGGTTGTGTAATTCAGATCATTTACTGTGAGTA  
AATCAAAGTGTTCAAAGCAGGCTTAAATGCTTGTATGGTTCAGCATGGAATAATAAGATA  
GGACTTCGGTTTTATTTTGTGGCTATAAAAACCAAAGTAATGATTGAAAGGGATAGTTG  
GGGGTGTAGTATTGGATGGTCAGCGGTGAAATGCGTGGACCCATTCAAGACTAACTTATG  
CGAAAGCATTACCAAGGATATCTTCT

>T023\_09

AGCTCCAATAGCGTATGCTAAAGTTGTTGCAGTTAAAAGGCTCGTAGTCGAACTTCTGAC  
TCTGATGAACCCGGTCCATCCTCTAGTAGGATGTGTGCTGGTGTGCACGGGTCATTCTTC  
TGGAAGTGTCTTCTGCCCTTCACTGGGTTGGTTGTATAATTCAGATCATTTACTGTGAGT  
AAATCAAAGTGTTCAAAGCAGGCTTAAATGCTTGTATGGTTCAGCATGGAATAATAAGAT  
AGGACTTCGGTTTTATTTTGTGGCTATAAAAACCAAAGTAATGATTGAAAGGGATAGTTG  
GGGGTGTAGTATTGGATGGTCAGCGGTGAAATGCGTGGACCCATTCAAGACTAACTTATG  
GCGAAAGCATTACCAAGGATATCTTCT

>T024\_01

AGCTCCAGTAGCGTATATTAAGTTGTTGCAGTTAAAAGGCTCGTAGTCGAATTTATGAC  
CCTGTGAACCTGGCCACTCTCTAGTAGGGTGTGTGCTGGTGTGCACGGGTCATTGTCT  
GGAAAGCATTCTGCCCTTGATTGGGTTGGTTATGTAATTCAGATCATTTACTGTGAGAA  
AATCAGAGTGTTCAAAGCAGGCAGCAATGCTTGTATGGTTCAGCATGGAATAATAAGATA  
AGACTTCGGTTTTATTTTGTGGCTATAGAACCAAAGTAATGATTGATAGGGATAGTTG  
GGGTGTAGTATTCAATGGTCAGCGGTGAAATGCGAGGACCCATTGAAGACTAACTTATG  
CGAAAGCATTACCAAGGATATCTTCT

>T025\_01

AGCTCCAATAGCATATATTAAGTTGTTGCAGTTAAAAGGCTCGTAGTCGAATATATGAC  
CCTGTGAACCTGACCCACTCTCTAGTAGGGTGTGTGTTGGTGTGCACGGGTCATTGTCT  
GGAAAGCATTCTGCCCTTGATTGGGTTGGATTTGTAATTCAGATCATTTACTGTGAGAA  
AATCAGAGTGTTCAAAGCAGGCAGCAATGCTTGTATGGTTCAGCATGGAATAATAAGATA  
AGACTTCGGTTTTATTTTGTGGCTATATAAGAACCAAAGTAATGATTGAAAGGGATAGTT  
GGGGTGTAGTATTCAAGTGGTTAGCGGTGAAATGCGATGACCCATTGAAGACTAACTTA  
TGCGAAAGCATTACCAAGGATATCTTCT

>T026a\_01

AGCTCCAATAGTATATATTAAGTTGTTGCAGTTAAAAGGCTCGTAGTCGAATATATGAC  
CCTGTGAACCTAACTCACTCACAAGTGGGGTGTGTTGGTGTGCACGGGCCATTGTCT  
GGAAAGCATTCTGCCCTTGATTGGGTAGTCTTGTAAATTCAGATCATTTACTGTGAGAA

AATCAAAGTGTTCAAAGCAGGCAGCAATGCTTGTATGGTTCAGCATGGAATAATAAGATA  
AGACTTCGGTTTTATTTTGTGGCTATATAGAACCAAAGTAATGATTGAAAAGGATAGTT  
GGGGTGTAGTATTCAGTGGCGAGCGGTGAAATGTGTTGACCCATTGAAGACTGACTAA  
TGCGAAAGCATTACCAAGGATATCTTTA

>T026b\_01

AGCTCCAATAGTATATATTAAGTTGTTGCAGTTAAAAGGCTCGTAGTCGAATATATGGC  
CCTGTGAACCTAACTCACTCACAAAGTTGGGTGTTTGTGGTGTGCACGGGCCATTGTCT  
GATACGCATTTCTGTCCTTGATTGGATAGTTATGTAATTCAGATCATTTACTGTGAGAA  
AATCAAAGTGTTCAAAGCAGGCAGCAATGCTTGTATGGTTCAGCATGGAATAATAAGATA  
AGACTTCGGTTTTATTTTGTGGCTATATAGAACCAAAGTAATGATTGAAAAGGATAGTT  
GGGGTGTAGTATTCAGTGGCGAGCGGTGAAATGTGTTGACCCATTGAAGACTAACTAA  
TGCGAAAGCATTACCAAGGATATCTTTA

>T027\_01

AGCTCCAATAGCATATGCTAAAGTTGTTGCAGTTAAAAGGCTCGTAGTCGAAGTTCTGGC  
CCCGGTGAACCTGGCCCATCCTCTAGTAGGGTGCAGTTGGTGTGCACGGGTCATCGTTCT  
GGAAAGCAATTCTGCCCTTGATTGGGTTGGTTTTGTAATTCAGATCATTTACTGTGAGAA  
AATCAGAGTGTTCAAAGCAGGCAGCAATGCTTGTATGGTTCAGCATGGAATAATAAGATA  
AGACTTTGGTTTTATTTTGTGGCTATAGAACCAAAGTAATGATTGAAAGGGATAGTTGG  
GGGTGCTAGTATTCAGTGGTCAGCGGTGAAATGCGAGGACCCATTGAAGACTAACTTATG  
CGAAAGCATTACCAAGGATATCTTCT

>T028\_03

AGCTCCAATAGCATATGCTAAAGTTGTTGCAGTTAAAAGGCTCGTAGTCGAAACTATGGC  
CCCGGTGAACCTGGCCCATCCTCTAGTAGGGTGCAGTTGGTGTGCACGGGTCATCGTTCT  
GGAAAGCAATTCTGCCCTTGATTGGGTTGGTTTTGTAATTCAGATCATTTACTGTGAGAA  
AATCAGAGTGTTCAAAGCAGGCAGCAATGCTTGTATGGTTCAGCATGGAATAATAAGATA  
AGACTTTGGTTTTATTTTGTGGCTATAGAACCAAAGTAATGATTGAAAGGGATAGTTGG  
GGGTGCTAGTATTCAGTGGTCAGCGGTGAAATGCGAGGACCCATTGAAGACTAACTTATG  
CGAAAGCATTACCAAGGATATCTTCT

>T029\_01

AGCTCCAAAAGCATATGCTAACGTTGTTGCAGTTAAAAGGCTCGTAGTCGAATTTATGTC  
CCTGTAGAACCTGGCCCATCCTCTAGTAGGGTGCAGTTGGTGTGCACGGGTCATTTTCTG  
TGAAGCAATTCGCCCTTCTACGTTGGTGGTTTTGTGATTCAGGTCATTTACTGTGAGT  
AATCAAAGTGTTCAAAGCAGGCAGCAATGCTTGTATGGTTCAGCATGGAATAATAAGATA  
AAGACTTCGGTTTTATTCTGTTGGCTATGAAACCAAAGTAATGATTGAAAGGGATAGTTG  
GGGGTGTAGTATTCAGTGGTCAGCGGTGAAATGCGAGGACCCATTGAAGACTAACTTATG  
CGAAAGCATTACCAAGGATATCTTCT

>T030\_01

AGCTCCAAAAGCATATGCTAACGTTGTTGCAGTTAAAAGGCTCGTAGTCGAATTTATGGC  
CCTGTGAACCTGGTCCATCCTCTAGTAGGGTGCAGTTGGTGTGCACGGGTCATCTTTCTG  
GAAAGCATCTCTGCCCTTGATTGGGTTGGTTTTGTAATTCAGAACATTTACTGTGAGTAA  
ATCAAAGTGTTCAAAGCAGGCAGCAATGCTTGTATGGTTCAGCATGGAATAATAAGATAA  
GACTTTGGTTTTATTTTGTGGCTATAGAACCAAAGTAATGATTGAAAGGGATAGTTGGG  
GGTGTAGTATTCAGTGGTCAGCGGTGAAATGCGAGGACCCATTGAAGACTAACTTATGC  
GAAAGCATTACCAAGGATATCTTCT

>T031\_01

AGCTCCAAAAGCATATGCTAACGTTGTTGCAGTTAAAAGGCTCGTAGTCGAATTTCTGGC  
CCTGTGAACCTGGCCAGCCTCTAGTAGGCTGCGGTGCGGTGTGCACGGGTCATTTTTCCG  
GAAAGCATTTCTGCCCTTGATTGGGTTGGTTTTGTAATTCGGAACATTTACTGTGAGTAA  
ATCAAAGTGTTCAAAGCAGGCAGCAATGCTTGTATGGTTCAGCATGGAATAATAAGATAA  
GACTTCGGTTTTATTTTGTGGCTATAGAACCAAAGTAATGATTGAAAGGGATAGTTGGG  
GGTGTAGTATTCAGTGGTCAGCGGTGAAATGCGAGGACCCATTGAAGACTAACTTATGC  
GAAAGCATTACCAAGGATATCTTCT

>T032\_01

AGCTCCAATAGCATATGCTAAAGTTGTTGCAGTTAAAAGGCTCGTAGTCGAATTTATGGC  
CCAGTGAACCTGGCCCATCCTCTAGTAGGGTGCAGCCGGTGTGCACGGGTCATTTTTCT  
GGAAAGCATTCTGCCCTTGATTGGGTTGGTTATGTAATTCAGATCTCTTACTGTGAGAA  
AATCAAAGTGTTCAAAGCAGGCAGCAATGCTTGTATGGTTCAGCATGGAATAATAAGATA  
AGACTTCGGTTTTATGTTGTGGCTATAGAACCAAAGTAATGATTGAAAGGGATAGTTGG  
GGGTGCTAGTATTCAGTGGTCAGCGGTGAAATGCGAGGACCCATTGAAGACTAACTTATG  
CGAAAGCATTACCAAGGATATCTTCT

>T033\_02

AGCTCCAATAGCATATGCTAAAGTTGTTGCAGTTAAAAGGCTCGTAGTCGAACCTTATGAC  
TCGGTGAACCTGGACCGTCTCTAGTAAGGCGCTCCGGTGTGCACGGGTCATTTTACT  
GGAAAGCAATTCGCCCTTGATTGGGTTGGTTTTGTGATTCAGTGCATTTACTGTGAGTA

AATCAAAGTGTTCAAAGCAGGCAGCAATGCTTGTATGGTTCAGCATGGAATAATAAGATA  
AGACTTTGGTTTTATTTTGTGGCTGTAGAACCAAAGTAATGATTGAAAGGGATAGTTGG  
GGGTGCTAGTATTCAGTGGTCAGCGGTGAAATGCGAGGACCCATTGAAGACTAECTTATG  
CGAAAGCATTACCAAGGATATCTTCT

>T034\_01

AGCTCCAATAGCATATGCTAAAGTTGTTGCAGTTAAAAGGCTCGTAGTCGAACTTATGAC  
CCTGTGAACCTGGTCCATCCTCTAGTAGGGTGCCTCCGGTGTGCACGGGTCATTTGTCT  
GGAGAGCATTCTGCCCTTGATTGGGTTGGTTATGTAATTCAGACCATTTACTGTGAGTA  
AATCAAAGTGTTCAAAGCAGGCAGCAATGCTTGTATGGTTCAGCATGGAATAATAAGATA  
AGACTTCGGTTTTATTTTGTGGCTATAGAACCAAAGTAATGATTGAAAGGGATAGTTGG  
GGGTGCTAGTATTCAGTGGTCAGCGGTGAAATGCGAGGACCCATTGAAGACTAECTTATG  
CGAAAGCATTACCAAGGATATCTTCT

>T035a\_01

AGCTCCAATAGCATATGCTAAAGTTGTTGCAGTTAAAAGGCTCGTAGTCGAACTTATGGC  
CCTGTGAACCTGGTCCATCCTCTAGTAGGGTGCCTCCGGTGTGCACGGGTCATTTTTCT  
GGAAAGCATTCTGCCCTTGATTGGGTTGGTTTTGTGATTGAGAACATTTACTGTGAGTA  
AATCAAAGTGTTCAAAGCAGGCAGCAATGCTTGTATGGTTCAGCATGGAATAATAAGATA  
AGACTTCGGTTTTATTTTGTGGCTATAGAACCAAAGTAATGATTGAAAGGGATAGTTGG  
GGGTGCTAGTATTCAGTGGTCAGCGGTGAAATGCGAGGACCCATTGAAGACTAECTTATG  
CGAAAGCATTACCAAGGATATCTTCT

>T035b\_03

AGCTCCAATAGCATATGCTAAAGTTGTTGCAGTTAAAAGGCTCGTAGTCGAACTTATGGC  
CCTGTGAACCTAGGCCATCCTCTAGTAGGGTGCCTCCGGTGTGCACGGGTCATTTTTCT  
GGAAAGCATTCTGCCCTTGATTGGGTTGGTTTTGTGATTGAGAACATTTACTGTGAGTA  
AATCAAAGTGTTCAAAGCAGGCAGCAATGCTTGTATGGTTCAGCATGGAATAATAAGATA  
AGACTTCGGTTTTATTTTGTGGCTATAGAACCAAAGTAATGATTGAAAGGGATAGTTGG  
GGGTGCTAGTATTCAGTGGTCAGCGGTGAAATGCGAGGACCCATTGAAGACTAECTTATG  
CGAAAGCATTACCAAGGATATCTTCT

>T036\_02

AGCTCCAGTAGCATATGCTAAAGTTGTTGCAGTTAAAAGGCTCGTAGTCGAAATTCTGGC  
CCAGTGAACCTTCCC GCCACTAGTTGGGTGTGCGTCCGGTGTGCACGGGTCATCGTTCT  
GAAGAGCATTCCGCTCTTGATTGAGTGTGCTTGTGTAATTCAGATCCTTTACTGTGAGTA  
AATCAGAGTGTTCAAAGCAGGCAGCAATGCCTGAATGGTTCAGCATGGAATAATAAGATA  
AGACTTCGGTTTTATTTTGTGGCTATAGAACCAAAGTAATGATTGAAAGGGATAGTTGG  
GGGTGCTAGTATTCAGTGGTCAGCGGTGAAATGCATAGACCCACTGAAGACTAECTTATG  
CGAAAGCATTACCAAGGATATCTTCT

>T037\_01

AGCTCCAATAGCATATGCTAAAGTTGTTGCAGTTAAAAGGCTCGTAGTCGAATGTCTGGC  
CCTGTGAACCCGTCCCAGTATCTAGTATACTGCGTGGCGGTGTGCACGGGTCATCGTTGT  
GAAGCGCACTACAATCTTGATTGAATTTGTTGTGTTATTCACATCTTTTACTGTGAGTA  
AATCAGAGTGTTCAAAGCAGGCAGCAATGCCTGAATGGTTCAGCATGGAATAATAAGATA  
AGACTTTGGATCTATCTTGTGGCTATGGAATCAAAGTAATGATTGAAAGGGATAGTTGG  
GGGTGCTAGTATTTGGTGGTCAGCGGTGAAATGCGAGGACCCACTGAAGACTAECTTATG  
CGAAAGCATTACCAAGGATATCTTCT

>T038\_03

AGCTCCAATAGCATATGCTAAAGTTGTTGCAGTTAAAAGGCTCGTAGTCGAATGTCTGGT  
CTCGTGAACCCATCCCATCCTCTAGTAGGGTGCAGATTGGTGTGCACGGACCCCTCGTTCT  
CAAGCGCAATTCGCCCTTGATTGGGTGCGTTTTGTTCCCTTGAGATCTTTTACTGTGAGT  
AAATCAGAGTGTTCAAAGCAGGCAGCATTCCTGTATGGTTCAGCATGGAATAATAAGATA  
AAGACTTTGGTTTTGTTTTGTTGGCTATGATACCTTAGTAATGATTGAAAGGGATAGTTG  
GGGTGCTAGTATTTGGTGGTCAGCGGTGAAATGCGAGGACCCACTGAAGACTAECTTAT  
GCGAAAGCATTACCAAGGATATCTTCT

>T039\_04

AGCTCCAATAGCATATGCTAAAGTTGTTGCAGTTAAAAGGCTCGTAGTCGAATGTATGAT  
CCTGTGAACCCGTCCCATCCTCTAGTAGGGTGCCTGGAGGTGTGCACGGATCATCGTTCT  
GAAGCGCATTTCGCCCTTGATTGGGTGTGTTATGTAATTCAGATCATTTTACTGTGAGTA  
AATCAGAGTGTTCAAAGCAGGCAGCAATGCTTGTATGGTTCAGCATGGAATAATAAGATA  
AGACTTTGGTTTTATTTTGTGGCTGTGAAACCTAAGTAATGATTGAAAGGGATAGTTGG  
GGGTGCTAGTATTCAGTGGTCAGCGGTGAAATGCGAGGACCCATTGAAGACTAECTTATG  
CGAAAGCATTACCAAGGATATCTTCT

>T040\_01

AGCTCCAATAGCATATGCTAAAGTTGTTGCAGTTAAAAGGCTCGTAGTCGAACCTATGGC  
CCTCGTTGAACCCGGCCCATCCTCTAGTAGGGTGTGCTGCGTGTGCACGGGTCATCGTT  
CTGGAGCGCACTTCGCCCTTGATTGGGTGTGTTGTGCAATTCAGATCTTTTACTGTGAG



TAAATCAGAGTGTTCAAAGCAGGCAGCAATGCTTGTATGGTTCAGCATGGAATAATAAGA  
TAAGACTTCGGTTTTGTTTTGTTGGCTATATAACCAAAGTAATGATTAATAGGGATAGTT  
GGGGTGTAGTATTACAGTGGTCAGCGGTGAAATGCGAGGACCCATTGAAGACTAACTTA  
TGCGAAAGCATTCACCAAGGATATCTTCT

>T041\_01

AGCTCCAATAGCATATGCTAAAGTTGTTGCAGTTAAAAGGCTCGTAGTCGAATTTATGAC  
CCTGTGCACCTGATCCAGCCTCTAGTAGGTTGTTGTATCAGAGTGCACGGGTCATCGTTC  
CGAAGCACAGTTCGCCATTGATTTGGTGTGTTTTGTAATTCGGATCATTTACTGTGAGT  
AAATCAGAGTGTTCAAAGCAGGCAGCAATGCTTGTATGGTTCAGCATGGAATAATAAGAT  
AAGACTTGGGTTTTAGTTTTGTTGGCTATGAAACCAAAGTAATGATTGAAAGGGATAGTTG  
GGGGTGTAGTATTACAGTGGTCAGCGGTGAAATGCGAGGACCCATTGAAGACTAACTTAT  
GCGAAAGCATTCACCAAGGATATCTTCT

>T042\_01

AGCTCCAATAGCATATGCTAAAGTTATTGCAGTTAAAAGGCTCGTAGTCGAATGTATGAC  
CCTGTGAACCAATCCCCTCTCTAGTAGGGTGCCTGGTGGTGTGCACGGGTCATCGTTCT  
GAAGCGCATTTCCGCCCTTGATTGGGTGTGTCTTGTAATTCAGATCATTTACTGTGAGTA  
AATCAGAGTGTTCAAAGCAGGCAGCAATGCTTGTATGGTTCAGCATGGAATAATAAGATA  
AGACTTCGGTTTTATGTTGTTGGCTATGAAACCAAAGTAATGATTGAATGGGATAGTTGG  
GGGTGCTAGTATTACAGTGGTCAGCGGTGAAATGCGAGGACCCATTGAAGACTAACTTATG  
CGAAATCATTCACCAAGGATATCTTCT

>T043\_01

AGCTCCAATAGCATATGCTAAAGTTGTTGCAGTTAAAAGGCTCGTAGTCGAATGTCTGGC  
CCTGTGAACCCGTCCCCTCCAGTAGGATGCGTGATGGTGTGCACGGGTCATCTTTCT  
GAAGCGCATTTCCGCCCTTGATTGGGTGTGTCTTGTAATTCAGATCAATTACTGTGAGTA  
AATCAGAGTGTTCAAAGCAGGCAGCAATGCTTGTATGGTTCAGCATGGAATAATAAGATA  
AGACTTCGGTTTTGTTTTGTTGGCTATGAAACCAAAGTAATGATTGAAAGGGATAGTTGG  
GGGTGCTAGTATTACAGTGGTCAGCGGTGAAATGCGAGGACCCATTGAAGACTAACTTATG  
CGAAAGCATTCACCAAGGATATCTTCT

>T044a\_01

AGCTCCAATAGCATATGCTAAAGTTGTTGCAGTTAAAAGGCTCGTAGTCGAATTTCTGGC  
CCTGTGAACCTGTCCCCTCTCTAGTAGGGTGCCTGATGGTGTGCACGGGTCATCTTTCT  
GAAGCGCATTTCCGCCCTTGATTGGGTGTGTCTCGTAATTCAGATCATTTACTGTGAGTA  
AATCAGAGTGTTCAAAGCAGGCAGCAATGCTTGTATGGTTCAGCATGGAATAATAAGATA  
AGACTTCGGTTTTATTTTTGTTGGCTATGAAACCAAAGTAATGATTGAAAGGGATAGTTGG  
GGGTGCTAGTATTACAGTGGTCAGCGGTGAAATGCGAGGACCCATTGAAGACTAACTTATG  
CGAAAGCATTCACCAAGGATATCTTCT

>T044b\_11

AGCTCCAATAGCATATGCTAAAGTTGTTGCAGTTAAAAGGCTCGTAGTCGAATTTCTGGC  
CCTGTGAACCTGTCCCCTCTCTAGTAGGATGCGCGATGGTGTGCACGGGTCATCTTTCT  
GAAGCGCAYTTCCGCCCTTGATTGGGTGTGTCTTGTAATTCAGATCATTTACTGTGAGTA  
AATCAGAGTGTTCAAAGCAGGCAGCAATGCTTGTATGGTTCAGCATGGAATAATAAGATA  
AGACTTCGGTTTTATTTTTGTTGGCTATGAAACCAAAGTAATGATTGAAAGGGATAGTTGG  
GGGTGCTAGTATTACAGTGGTCAGCGGTGAAATGCGAGGACCCATTGAAGACTAACTTATG  
CGAAAGCATTCACCAAGGATATCTTCT

>T045\_07

AGCTCCAATAGCATATGCTAAAGTTGTTGCAGTTAAAAGGCTCGTAGTCGAAGGTATGGC  
CYTGTGAACCCGKCCCATCCTCTAGTAGGATGCGTGTCCGGTGTGCACGGGCTTCGTCT  
GAAGCGCATTTCCGCCCTTGATTGGGTGTGTCTTGTTATTCAGATCATTTACTGTGAGTA  
AATCAGAGTGTTCAAAGCAGGCAGCAATGCTTGTATGGTTCAGCATGGAATAATAAGATA  
AGACTTCGGTTTTATTTTTGTTGGCTATAAAACCAAAGTAATGATTGAAAGGGATAGTTGG  
GGGTGCTAGTATTACAGTGGTCAGCGGTGAAATGCGAGGACCCATTGAAGACTAACTTATG  
CGAAAGCATTCACCAAGGATATCTTCT

>T046\_01

AGCTCCAATAGCATATGCTAAAGTTGTTGCAGTTAAAAGGCTCGTAGTCGAAATTCGAC  
CCTGTGAACCCGGTCCCTCTCTAGTAGGGTGCCTGCGGTGTGCACGGGCTTTTATTCT  
GAAGCGCAATTCCGTCCTTGATTGGGTGTGTCTTGTAATTCAGATCATTTACTGTGAGTA  
AATCAGAGTGTTCAAAGCAGGCAGCAATGCTTGTATGGTTCAGCATGGAATAATAAGATA  
AGACTTCGGTTTTATTTTTGTTGGCTATAAGACCAAAGTAATGATTGAAAGGGATAGTTGG  
GGGTGCTAGTATTACAGTGGTCAGCGGTGAAATGCGAGGACCCATTGAAGACTAACTTATG  
CGAAAGCATTCACCAAGGATATCTTCT

>T047\_03

AGCTCCAATAGCATATGCTAAAGTTGTTGCAGTTAAAAGGCTCGTAGTCGAAATTCGAC  
CATGTGAACCCGGCCCTCTCTAGTAGGATGCGTGCCGGTGTGCACGGGTCATCGTTCT  
GAAGCGCAATTCCGTCCTTGATTGGGTGTGTCTTGTAATTCAGATCATTTACTGTGAGTA

AATCAGAGTGTTCAAAGCAGGCAGCAATGCTTGTATGGTTCAGCATGGAATAATAAGATA  
AGACTTCGGTTTTATTTTGTGGCTATAAAACCAAAGTAATGATTGAAAGGGATAGTTGG  
GGGTGCTAGTATTCAGTGGTCAGCGGTGAAATGCGAGGACCCATTGAAGACTAACTTATG  
CGAAAGCATTACCAAGGATATCTTCT

>T048a\_01

AGCTCCAATAGCATATGCTAAAGTTGTTGCAGTTAAAAGGCTCGTAGTCGAAATTCTGGC  
CCTGTGAACCCGGCCCATCCTCTAGTAGGGTGCCTGCGGTGTCACGGGTCATCGTTCT  
GAAGCGCAATTCCGTCCTTGATTGGGTGTGTTTTGTAATTCAGATCATTTACTGTGAGTA  
AATCAGAGTGTTCAAAGCAGGCAGCAATGCTTGTATGGTTCAGCATGGAATAATAAGATA  
AGACTTCGGTTTTATTTTGTGGCTATGAAACCAAAGTAATGATTGAAAGGGATAGTTGG  
GGGTGCTAGTATTCAGTGGTCAGCGGTGAAATGCAAGGACCCATTGAAGACTAACTTATG  
CGAAAGCATTACCAAGGATATCTTCT

>T048b\_03

AGCTCCAATAGCATATGCTAAAGTTGTTGCAGTTAAAAGGCTCGTAGTCGAAATTCTGGC  
CCAGTGAACCTGGCCCATCCTCTAGTAGGGTGCCTGCGGTGTCACGGGTCATCGTTCT  
GAAGCGCAATTCCGTCCTTGATTGGGTGCCTTTTTGTAATTCAGATCATTTACTGTGAGTA  
AATCAGAGTGTTCAAAGCAGGCAGCAATGCTTGTATGGTTCAGCATGGAATAATAAGATA  
AGACTTCGGTTTTATTTTGTGGCTATAAAACCAAAGTAATGATTGAAAGGGATAGTTGG  
GGGTGCTAGTATTCAGTGGTCAGCGGTGAAATGCAAGGACCCATTGAAGACTAACTTATG  
CGAAAGCATTACCAAGGATATCTTCT

>T049\_01

AGCTCCAATAGCATATGCTAAAGTTGTTGCAGTTAAAAGGCTCGTAGTCGAAATTCTGGC  
CCAGAGAACCTGGCCCATCCTCTAGTAGGGTGTGTGCGCGGTGTCACGGGTCATCGTTCT  
TAAAGCACAAATCCGCCCTTGATTGGGTGTGCTTTGTAATTTAGATCCTTTACTGTGAGT  
AAATCAGAGTGTTCAAAGCAGGCAGCAATGCTTGTATGGTTCAGCATGGAATAATAAGAT  
AAGACTTCGGTTTTATTTTGTGGCTTGTGAAACCAAAGTAATGATTGAAAGGGATAGTT  
GGGGTGTAGTATTCAGTGGTCAGCGGTGAAATGCGAGGACCCATTGAAGACTAACTTA  
TGCGAAAGCATTACCAAGGATATCTTCT

>T050\_01

AGCTCCAATAGCATATGCTAAAGTTGTTGCAGTTAAAAGGCTCGTAGTCGAAATTCTGTC  
CCAGAGAACCTGGTCCATCCTCTAGTAGGGTGCCTGCGGTGTCACGGGTCATCGTTCT  
AAAGCAGATCTCCGTCCTTGATTGGATGTGTTATGTAATTTAGATCATTACTGTGAGTA  
AATCAGAGTGTTCAAAGCAGGCAGGATGCCTGTATGGTTCAGCATGGAATAATAAGATA  
AGACTTCGGTTTTATTTTGTGGCTATAAAACCAAAGTAATGATTGAAAGGGATAGTTG  
GGGGTGTAGTATTCAGTGGTCAGCGGTGAAATGCGAGGACCCATTGAAGACTAACTTAT  
GCGAAAGCATTACCAAGGATATCTTCT

>T051\_03

AGCTCCAATAGCATATGCTAAAGTTGTTGCAGTTAAAAGGCTCGTAGTCGAAATTCTGGC  
CCAGAGAACCTGGCCCATCCTCTAGTAGGGTGCCTGCGGTGTCACGGGTCATCGTTCT  
GAAGCGCAATTCCGTCCTTGATTGGGTGYGTWTTGTAATTCAGATCATTTACTGTGAGTA  
AATCAGAGTGTTCAAAGCAGGCAGCAATGCTTGTATGGTTCAGCATGGAATAATAAGATA  
AGACTTCGGTTTTATTTTGTGGCTATAAAACCAAAGTAATGATTGAAAGGGATAGTTG  
GGGGTGTAGTATTCAGTGGTCAGCGGTGAAATGCGAGGACCCATTGAAGACTAACTTAT  
GCGAAAGCATTACCAAGGATATCTTCT

>T052\_01

AGCTCCAATAGCATATGCTAAAGTTGTTGCAGTTAAAAGGCTCGTAGTCGAACATATGGC  
TCTGATGGGACCCCTCCCGCTCTCTAGTAGGGTGGCGTAGGTGTGCACGGGTCATACTTT  
CTGAGGAGCAATTCTGCCCTTGATTGGGTGGTCTTGCGAATCAGATCATTTACTGTGAG  
TAAATCAAAGTGTTCAAAGCAGGCAGCAATGCTTGTATGGTTCAGCATGGAATAATAAGA  
TAAGACTTCGGTTTTATTTTGTGGCTATGAAACCAAAGTAATGATTGAAAAGGATGGTT  
GGGGTGTCTAATATTCAGTGGTCAGCGGTGAAATGCGAGGACCCATTGAAGATTGACTTA  
TGCGAAAGCATTACCAAGGACATCTTTA

>T053\_01

AGCTCCAATAGCATATGCTAAAGTTGTTGCAGTTAAAAGGCTCGTAGTCGAATTTATGGC  
CCCAGTGAACCCCTCCGGCCCTCTAGTAGGGTGTGTGTAGGTGTGCACGGGTCATTGTTT  
TGAAGAGCAGGTTCCGCCCTTGATTGGGTGGGTCTGTAATTCAAATCATTTACTGTGAGA  
AAATCAGAGTGTTCAAAGCAGGCAGCAATGCTTGTATGGTTCAGCATGGAATAATAAGAT  
AAGACTTTGGTTTTATTTTGTGGCTATATAGAACCTAAGTAATGATTGAAAAGGATAGT  
TGGGGTGTAGTATTCAGTGGTCAGCGGTGAAATGCGAGGACCCATTGAAGACTAACTT  
ATGCGAAAGCATTACCAAGGATATCTTTA

>T054\_05

AGCTCCAATAGCATATGCTAAAGTTGTTGCAGTTAAAAGGCTCGTAGTCGAATTTATGGC  
CCTGTGCACCCTTCCACCCTCTAGTAGGGTGTGTGTTGGTGTGCACGGGTCATTGTTCT  
GGTGATCAGTTCCGCCCTTGATTGGGTGGATTTGTGATTCAGATCATTTACTGTGAAA

AATCAGAGTGTTCAAAGCAGGCAGCAATGCTTGTATGGTTCAGCATGGAATAATAAGATA  
AGACTTCGGTTTTGTTTTGTTGGCTATAAAGAACCAAAGTAATGATTGAAAAGGATAGTT  
GGGGTGTAGTATTACAGTGGTTAGCGGTGAAATGCGAGGACCCATTGAAGACTAECTTA  
TGCGAAAGCATTACCAAGGATATCTTTA

>T055\_02

AGCTCCAATAGCATATGCTAAAGTTGTTGCAGTTAAAAGGCTCGTAGTCGAATTTATGGC  
CCCAGTGAACCCCTCCCAACCTCTAGTAGGATGTGCGTTCGGCGTGCACGGGTCATTGTTT  
TGGAAGCAGGGCTGCCCTTGATTGGGTTGGTTTTGTAATTCAGATCATTTACTGTGAGT  
AAATCAAAGTGTTCAAAGCAGGCAGCAATGCTTGTATGGTTCAGCATGGAATAATAAGAT  
AAGACTTTGGTTTTATTTTGTGGCTATAGAACCAAAGTAATGATTGAAAAGGATAGTTG  
GGGGTGTAGTATTACAGTGGTTCAGCGGTGAAATGCGAGGACCCATTGAAGACTAECTTA  
GCGAAAGCATTACCAAGGATATCTTTA

>T056\_05

AGCTCCAATAGCATATGCTAAAGTTGTTGCAGTTAAAAGGCTCGTAGTCGAATTTATGGC  
CCTAGTGAACCTGTCCCATCCTCTAGTAGGTTGTGTTTGACGGCGTGCACGGGTCATTAT  
TCTGAAAAGCAATGCTGCCCTTGATTGGGTTGGTTTTGTAATTCAGATCATTTACTGTGA  
GTAAATCAAAGTGTTCAAAGCAGGCAGCAATGCTTGTATGGTTCAGCATGGAATAATAAG  
ATAAGACTTTGGTTTTATTTTGTGGCTCTAGAACCAAAGTAATGATTGAAAAGGATAGT  
TGGGGTGTAGTATTACAGTGGTTCAGCGGTGAAATGCGAGGACCCATTGAAGACTAECTT  
ATGCGAAAGCATTACCAAGGATATCTTTA

>T057\_01

AGCTCCAATAGCATATGCTAAAGTTGTTGCAGTTAAAAGGCTCGTAGTCGAATTTCTGGC  
TCTGTCAAACCCGGCCACCCTCTAGTAGGTTGTGTTTGCTGGTGTTCACGGGTCATTTT  
TCTGAAAAGCGGCTCTGCTCTTAACTGAGCCAGGGTGGTAATTCAGATCATTTACTGTGA  
GTAAATCAAAGTGTTCAAAGCAGGCAGCAATGCTTGTATGGTTCAGCATGGAATAATAAA  
ATATGGCTTTGGTCTTATTTTGTGGCTCTAGGACCAAAGTAATGATTGAAAAGGATAGT  
TGGGGTGTAGTATTACAGTGGTTCAGCGGTGAAATGCGAGGACCCATTGAAGACTAECTT  
ATGCGAAAGCATTACCAAGGATATCTTTA

>T058\_04

AGCTCCAATAGCATATGCTAACGTTGTTGCAGTTAAAAGGCTCGTAGTCGAATTTATGGC  
CCCAGTGAACCCCTCCCATCTTCTAGTAGGATGTGTGTTGGTGTGCACGGGTCATTGTTT  
TGGAAGCAGTCCAGCCCTTGATTGGGTTGTTGTGTAATTCAGATCAATTACTGTGAGT  
AAATCAAAGTGTTCAAAGCAGGCAGCATCGCCTGAATGGTTCAGCATGGAATAATAAGAT  
AAGACTTTGTTTTATTTTGTGGCTATAGAACTTAAGTAATGATTGAAAAGGATAGTTG  
GGGGTGTAGTATTGCGTGGTTCAGCGGTGAAATGCGAGGACCCATTGAAGACTAECTTA  
GCGAAAGCATTACCAAGGATATCTTTA

>T059\_01

AGCTCCAATAGCATATGCTAAAGTTGTTGCAGTTAAAAGGCTCGTAGTCGAATTTATGGC  
CCCAGTGAACCCCTCCCTTCCCTCTAGTTAGGATGCGTGTAGGTTGTGCACGGGTCATTGTT  
CTGGAAAGCATGGTTTTGTTCCAACGGGATGGCTGTGTAATTCAGATCATTTACTGTGAGT  
AAATCAAAGTGTTCAAAGCAGGCAGCAATGCTTGTATGGTTCAGCATGGAATAATAAGAT  
AAGACTTTGTTTTATTTTGTGGCTTGAACCAAAGTAATGATTGAAAAGGATAGTTG  
GGGGTGTAGTATTACAGTGGTTCAGCGGTGAAATGCGAGGACCCATTGAAGACTAECTTA  
GCGAAAGCATTACCAAGGATATCTTTA

>T060\_03

AGCTCCAATAGCATATGCTAAAGTTGTTGCAGTTAAAAGGCTCGTAGTCGAATTTATGGT  
CAGCGTGAACCCCTCCCATCCTCTAGTAGGATTCGTTGGTAGGTTGTGCACCGCCATTTT  
TCTGAAAAGCTCTTCAATCCTTGATTGGATTTGCTGAGACTTTCAGATCATTTACTGTGA  
GTAAATCAAAGTGTTCAAAGCAAGCATCTTTAGCTTGTATGGTTCAGCATGGAATAATAAA  
GATAAGACTTTGGTTTTATATTATTTGGCTCTAGAACCAAAGTAATGATTGAAAAGGATAG  
TTGGGGTGTAGTATTACAGTGGTTCAGCGGTGAAATGCGAGGACCCATTGAAGACTAECTT  
TATGCGAAAGCATTACCAAGGATATTTTTG

>T061\_02

AGCTCCAATAGCATATGCTAAAGTTGTTGCAGTTAAAAGGCTCGTAGTCGAATTTATGGC  
CCTAGTGAACCTTCCACCCCTCTAGTAGGTTGCGTGTGATGTGCACGGGTCATTGTT  
CTGGAAAGCAAGTCTGCCCTTGATTGGGTTGGTCTTGCAATTCAGATCATTTACTGTGAG  
TAAATCAAAGTGTTCAAAGCAGGCAGCAATGCTTGTATGGTTCAGCATGGAATAATAAGA  
TAAGACTTCGGTTTTGTTTTGTTGGCTATAGAACCAAAGTAATGATTGAAAAGGATAGTT  
GGGGTGTAGTATTACAGTGGTTCAGCGGTGAAATGCGAGGACCCATTGAAGACTAECTTA  
TGCGAAAGCATTACCAAGGATATCTTTA

>T062\_01

AGCTCCAATAGCATATGCTAAAGTTGTTGCAGTTAAAAGGCTCGTAGTCGAATTTATGGC  
CCTAGTGAACCTTCCCATCCTCTAGTAGGATGCGCGTGCATGTGCACGGGTCATTGTTT  
TGGAAGCTAGTCTGCCCTCAGTTGGGTTGGTCTAGTAATTCAGATCATTTACTGTGAGT

AAATCAAAGTGTTCAAAGCAGGCAGCAATGCTTGTATGGTTCAGCATGGAATAATAAGAT  
ACGACTTCGGTTCTGTCTTGTGGCTATAGAACCAAAGTAATGATTGAAAAGGATAGTTG  
GGGGTGTAGTATTTGGTGGTCAGCGGTGAAATGCGAGGACCCACTGAAGACTAACTTAT  
GCGAAAGCATTACCAAGGATATCTTCT

>T063\_01

AGCTCCAATAGCATATGCTAAAGTTGTTGCAGTTAAAAGGCTCGTAGTCGAATTTATGGC  
CCCAGTGAACCCTTCCACCTTCTAGTAGGGTGC GCGTTCGGTGTGCACGGGTCATTTCTT  
CTGGAAAGTTAGTTTCCCCTTGATTGGGTTTGGCTAATAATCCAGATCATTTACTGTGAG  
TAAATCAAAGTGTTCAAAGCAGGCAGCAATGCTTGTATGGTTCAGCATGGAATAATAAGA  
TAAGACTTCGGTTCTATTTTGTGGCTATAGGACCAAAGTAATGGTTGAAAAGGATAGTT  
GGGGTGTAGTATTCAGTGGTCAGCGGTGAAATGCGAGGACCCATTGAAGACTAACTTA  
TGCGAAAGCATTACCAAGGATATCTTYA

>T064\_02

AGCTCCAATAGCATATGCTAAAGTTGTTGCAGTTAAAAGGCTCGTAGTCGAACTTATGGC  
YCCAGTGAACCCTTCCACCTTCTAGTAAGGTGC GCGTTCGGTGTGCACGGGTCATTTGTTT  
TGGAAAGCATGTCTACCCTTGATTGGGCTAGGCTTGTGATTTCAGATCATTTACTGTGAGT  
AAATCAAAGTGTTCAAAGCAGGCAGCAATGCTTGTATGGTTCAGCATGGAATAATAAGAT  
AAGACTTCGGTTTGTGGCTATAGAACCAAAGTAATGATTGAAAAGGATAGTTG  
GGGGTGTAGTATTCAGTGGTCAGCGGTGAAATGCGAGGACCCATTGAAGACTAACTTAT  
GCGAAAGCATTACCAAGGATATCTTFA

>T065a\_01

AGCTCCAATAGCATATGCTAAAGTTGTTGCAGTTAAAAGGCTCGTAGTCGAACTTATGGC  
CCCAGTGAACCCTTCCACCTTCTAGTAAGGTGC GCGTTCGGTGTGCACGGGTCATCGTTC  
TGGAAAGCATGTCTACCCTTGATTGGGCTAGGCTTGTGATTTCAGATCATTTACTGTGAGT  
AAATCAAAGTGTTCAAAGCAGGCAGCAATGCTTGTATGGTTCAGCATGGAATAATAAGAT  
AAGACTTCGGTTTGTGGCTATAGAACCAAAGTAATGATTGAAAAGGATAGTTG  
GGGGTGTAGTATTCAGTGGTCAGCGGTGAAATGCGAGGACCCATTGAAGACTAACTTAT  
GCGAAAGCATTACCAAGGATATCTTFA

>T065b\_01

AGCTCCAATAGCATATGCTAAAGTTGTTGCAGTTAAAAGGCTCGTAGTCGAACTTATGGC  
CCCAGTGAACCCTTCCACCTTCTAGTAAGGTGC GCGTTCGGTGTGCACGGGTCATCGTTC  
TGGAAAGCATGTCTGCCCTTGATTGGGCTGGCATGTAATTCAGATCATTTACTGTGAGT  
AAATCAAAGTGTTCAAAGCAGGCAGCAATGCTTGTATGGTTCAGCATGGAATAATAAGAT  
AAGACTTCGGTTTATTTGTGGCTATAGGACCAAAGTAATGATTGAAAAGGATAGTTG  
GGGGTGTAGTATTCAGTGGTCAGCGGTGAAATGCGAGGACCCATTGAAGACTAACTTAT  
GCGAAAGCATTACCAAGGATATCTTFA

>T065c\_01

AGCTCCAATAGCATATGCTAAAGTTGTTGCAGTTAAAAGGCTCGTAGTCGAACTTATGGC  
CCCAGTGAACCCTTCCACCTTCTAGTAAGGTGC GCGTTCGGTGTGCACGGGTCATCGTT  
CTGGAAAGCATGTCTGCCCTTGATTGGGTTGGGCATGTAATTCAGATCATTTACTGTGAG  
TAAATCAGAGTGTTCAAAGCAGGCAGCAATGCTTGTATGGTTCAGCATGGAATAATAAGA  
TAAGACTTCGGTTTATTTGTGGCTATAGAACCAAAGTAATGATTGAAAAGGATAGTTG  
GGGGTGTAGTATTCAGTGGTCAGCGGTGAAATGCGAGGACCCATTGAAGACTAACTTAT  
TGCGAAAGCATTACCAAGGATATCTTFA

>T066\_01

AGCTCCAATAGCATATGCTAAAGTTGTTGCAGTTAAAAGGCTCGTAGTCGAATTTATGGC  
CCCAGTGAACCCTTCCACTCTCTAGTAGGGTGC GCGTTCGGTGTGCACGGGTCATTTGTTT  
TGGAAAGCAAGTCTGCCCTTGATTGGGTTGGTCTTGTAAATTCAGATCATTTACTGTGAGT  
AAATCAAAGTGTTCAAAGCAGGCAGCGATGTTTGTATGTTTCAGCATGGAATAATAAGAT  
AAGACTTCGGTTTATTTGTGGCTATGAAACCAAAGTAATGATTGAAAAGGATAGTTG  
GGGGTGTAGTATTCAGTGGTCAGCGGTGAAATGCGAGGACCCATTGAAGACTAACTTAT  
GCGAAAGCATTACCAAGGATATCTTCA

>T067\_01

AGCTCCAATAGCATATGCTAAAGTTGTTGCAGTTAAAAGGCTCGTAGTCGAACTTCTGGC  
CCCAGTGAACCCTTCCACTCTCTAGTAGAGTGC GCGTTCGGTGTGCACGGGTCATTTGTT  
CTGGAAAGCAAGTTCGGTCTTGATTGGGTCGCGCTTGTAAATTCAGATCATTTACTGTGAG  
TAAATCAGAGTGTTCAAAGCAGGCAGCAATGCTTGTATGGTTCAGCATGGAATAATAAGA  
TAAGACTTCGGTTTATTTGTGGCTATGAAACCAAAGTAATGATTGAAAAGGATAGTTG  
GGGGTGTAGTATTCAGTGGTCAGCGGTGAAATGCATGGACCCATTGAAGACTAACTTAT  
TGCGAAAGCATTACCAAGGATATCTTCA

>T068\_02

AGCTCCAATAGCATATGCTAAAGTTGTTGCAGTTAAAAGGCTCGTAGTCGAACTTATGGC  
CCCAGTGAACCCTTCCACTCTCTAGTAGGGTGC GCGTTCGGTGTGCACGGGTCATTTGTTT  
TGGAAAGCAAGTTCGGTCTTGATTGGGTTGTCTTGTAAATTCAGATCTATTACTGTGAGA

AAATCAAAGTGTTCAAAGCAGGCAGCGATGCTTGTATGGTTCAGCATGGAATAATAAGAT  
AAGACTTCGGTTTTATTTTGTGGCTATAGAACCAAAGTAATGATTGAAAGGGATAGTTG  
GGGGTGTAGTATTTCAGTGGTCAGCGGTGAAATGCGAGGACCCATTGAAGACTAACTTAT  
GCGAAAGCATTACCAAGGATATCTCTCA

>T069\_01

AGCTCCAATAGCATATGCTAAAGTTGTTGCAGTTAAAAGGCTCGTAGTCGAACTTATGGC  
TTCAGTGAACCCCTCCACCTCTAGTAGGGTGCCTGTCGGTGTGCACGAGTCATTTTTTC  
TGAAAGTTAGTCGGCCCTTGATTGGGTTTGTCTAATAATTCAGATCTATTACTGTGAGT  
AAATCAAAGTGTTCAAAGCAGGCAGCGATGCTTGAATGGTTCAGCATGGAATAATAAGAT  
AAGACTTCGGTTTTATTTTGTGGCTATAGAACCAAAGTAATGATTGAAAGGGATAGTTG  
GGGGTGTAGTATTTCAGTGGTCAGCGGTGAAATGCGAGGACCCATTGAAGACTAACTTAT  
GCGAAAGCATTACCAAGGATATCTCTCT

>T070\_10

AGCTCCAATAGCATATGCTAAAGTTGTTGCAGTTAAAAGGCTCGTAGTCGAACTTATGGC  
CTCAGTGAACCCCTCCACCTCTAGTAGAGTGCCTGTCGGTGTGCACGGGTCATTGTTTC  
TGGAGCGGGGTGCGCCCTTGATTGGGTTTGTCTTTTATCCAGATCTATTACTGTGAGT  
AAACCAAAGTGTTCAAAGCAGGCAGCGATGCTTGAATGGTTCAGCATGGAATAATAAGAT  
AAGACTTCGGTTTTATTTTGTGGCTATAGAACCAAAGTAATGATTGAAAGGGATAGTTG  
GGGGTGTAGTATTTCAGTGGTCAGCGGTGAAATGCGAGGACCCATTGAAGACTAACTTAT  
GCGAAAGCATTACCAAGGATATCTCTCA

>T071\_01

AGCTCCAATAGCATATGCTAAAGTTGTTGCAGTTAAAAGGCTCGTAGTCGAACTTATGGC  
CCCAGTGAACCCCTCCACCTCTAGTAGGGTGCCTGTCGGTGTGCACGGGTCATTGTTTC  
TGGAAAGCAAGTCTGCCCTTGATTGGGTTTGGTCTTGTAAATTCAGATCTATTACTGTGAGA  
AAATCAAAGTGTTCAAAGCAGGCAGCAATGCCTGAATGGTTCAGCATGGAATAATAAGAT  
AAGACTTTGGTTTTATTTTGTGGCTATAGAACCAAAGTAATGATTGAAAGGGATAGTTG  
GGGGTGTAGTATTTCAGTGGTCAGCGGTGAAATGCGAGGACCCATTGAAGACTAACTTAT  
GCGAAAGCATTACCAAGGATATCTCTCA

>T072\_01

AGCTCCAATAGCATATGCTAAAGTTGTTGCAGTTAAAAGGCTCGTAGTCGAACTTATGGC  
CCCAGTGAACCCCTCCACCTCTAGTAGGGTGCCTGTCGGTGTGCACGGGTCATTGTTTC  
TGGAAAGCAAGTCTGCCCTTGATTGGGTCGGTCTTGTAAATTCAGATCATTTACTGTGAGT  
AAATCAAAGTGTTCAAAGCAGGCAGCAATGCCTGAATGGTTCAGCATGGAATAATAAGAT  
AAGACTTTGGTTTTATTTTGTGGCTATAGAACCAAAGTAATGATTGAAAGGGATAGTTG  
GGGGTGTAGTATTTCAGTGGTCAGCGGTGAAATGCGAGGACCCATTGAAGACTAACTTAT  
GCGAAAGCATTACCAAGGATATCTCTCA

>T073\_01

AGCTCCAATAGCATATGCTAAAGTTGTTGCAGTTAAAAGGCTCGTAGTCGAACTTATGGC  
CCCAGTGAACCCCTCCACCTCTAGTAGGATGCGCGTGGTGTGCACGGGTCATTGTTTC  
TCTGAAAGCAAGTCTGCCCTTGATTGGGTCGGTCTTGTAAATTCAGATCATTTACTGTGAG  
GTAATCAAAGTGTTCAAAGCAGGCAGCAATGCCTGAATGGTTCAGCATGGAATAATAAG  
ATAAGACTTCGGTTTTATTTTGTGGCTATAGAACCAAAGTAATGATTGAAAGGGATAGT  
TGGGGTGTAGTATTTCAGTGGTTCAGCGGTGAAATGCGAGGACCCATTGAAGACTAACTT  
ATGCGAAAGCATTACCAAGGATATCTCTCA

>T074\_01

AGCTCCAATAGCATATGCTAAAGTTGTTGCAGTTAAAAGGCTCGTAGTCGAACTTATGGC  
CCCAGTGAACCCCTCCACCCGCTAGTCGGGTGCCTGTCGGTGTGCACGGGTCATTGTTTC  
TGAAAGCAAGTCTGCCCTTGATTGGGTTGGTCTTGTAAATTCAGATCATTTACTGTGAGT  
AAATCAAAGTGTTCAAAGCAGGCAGCAATGCCTGAATGGTTCAGCATGGAATAATAAGAT  
AAGACTTTGGTTTTATTTTGTGGCTATAGAACCAAAGTAATGATTGAAAGGGATAGTTG  
GGGGTGTAGTATTTCAGTGGTTCAGCGGTGAAATGCGAGGACCCATTGAAGACTAACTTAT  
GCGAAAGCATTACCAAGGATATCTCTCA

>T075\_01

AGCTCCAATAGCATATGCTAAAGTTGTTGCAGTTAAAAGGCTCGTAGTCGAACTTATGGC  
CCCAGTGAACCCCTCCACCCCTAGTAGGGTGCCTGTCGGTGTGCACGGGTCATTTTTTC  
TGAAAGCTCTTCTGCCCTTGATTGGGTCGGTCTAGTAATTCAGATCATTTACTGTGAGT  
AAATCAAAGTGTTCAAAGCAGGCAGCGATGCCTGAATGGTTCAGCATGGAATAATAAGAT  
AAGACTTCGGTTTTATGTTGTTGGCTAGGACCAAAGTAATGATTGAAAGGGATAGTTG  
GGGGTGTAGTATTTCAGTGGTTCAGCGGTGAAATGCGAGGACCCATTGAAGACTAACTTAT  
GCGAAAGCATTACCAAGGATATCTCTCA

>T076\_05

AGCTCCAATAGCATATGCTAAAGTTGTTGCAGTTAAAAGGCTCGTAGTCGAACTTATGGC  
CCCAGTGAACCCCTCCCATCTCTAGTAGGATGCGCGTGGTGTGCACGGGTCATTTTTTC  
TGAAAGCATTCTGCCCTTGATTGGGTTGGTCTTGTAAATTCAGATCATTTACTGTGAGT

AAATCAAAGTGTTCAAAGCAGGCAGCRATGCCTGAATGGTTCAGCATGGAATAATAAGAT  
AAGACTTYGGTYTTATGTTGTTGGCTGTAGGACCAAAGTAATGATTGAAAGGGATAGTTG  
GGGGTGTAGTATTTCAGTGGTCAGCGGTGAAATGCGAGGACCCATTGAAGACTAACTTAT  
GCGAAAGCATTACCAAGGATATCTTCA

>T077a\_03

AGCTCCAATAGCATATGCTAAAGTTGTTGCAGTTAAAAGGCTCGTAGTCGAACTTATGGC  
CCCAGTGAACCCCTCCACCTTCTAGTAAGGTGCGCGTGGTGTGCACGGGTCATTGTTT  
TGAAAGCAAGTCTGCCCTTGATTGGGTTGGTCTTGTAAATTCAGATCATTTACTGTGAGT  
AAATCAAAGTGTTCAAAGCAGGCAGCAATGCCTGAATGGTTCAGCATGGAATAATAAGAT  
AAGACTTCGGTTTTATTTTGTGGCTATAGAACCAAAGTAATGATTGAAAGGGATAGTTG  
GGGGTGTAGTATTTCAGTGGTCAGCGGTGAAATGCGAGGACCCATTGAAGACTAACTTAT  
GCGAAAGCATTACCAAGGATATCTTCA

>T077b\_02

AGCTCCAATAGCATATGCTAAAGTTGTTGCAGTTAAAAGGCTCGTAGTCGAACTTATGGC  
CCCAGTGAACCCCTCCACCTTCTAGTAAGGTGCGCGTAGGTGTGCACGGGTCATTGTTT  
TGAAAGCATTCTGCCCTTGATTGGGTTGGTCTTGTAAATTCAGATCATTTACTGTGAGT  
AAATCAAAGTGTTCAAAGCAGGCAGCAATGCCTGAATGGTTCAGCATGGAATAATAAGAT  
AAGACTTCGGTTTTATTTTGTGGCTATAGAACCAAAGTAATGATTGAAAGGGATAGTTG  
GGGGTGTAGTATTTCAGTGGTCAGCGGTGAAATGCGAGGACCCATTGAAGACTAACTTAT  
GCGAAAGCATTACCAAGGATATCTTCA

>T078\_02

AGCTCCAATAGCATATGCTAACGTTGTTGCAGTTAAAAGGCTCGTAGTCGAAATTTCTGGC  
CCCAGTGAACCCCTCCACCTTCTAGTAGGGTGCCTGTAGGTGTGCACGGGTCATTGTTT  
TGAAAGCAAGTCTGCCCTTGATTGGGTTGGTCTTGTGATTTCAGATCAATTACTGTGAGT  
AAATCAAAGTGTTCAAAGCAGGCTGTTAAGCCTGAATGGTTCAGCATGGAATAATAAGAT  
AAGACTTCGGTTTTGTTTTGTTGGTTATAGAACCAAAGTAATGATTGAAAGGGATAGTTG  
GGGGTGTAGTATTTCAGTGGTCAGCGGTGAAATGCGAGGACCCATTGAAGACTAACGTAT  
GCGAAAGCATTACCAAGGATATCTTCA

>T079a\_05

AGCTCCAATAGCATATGCTAACGTTGTTGCAGTTAAAAGGCTCGTAGTCGAAATTTCTGGC  
CCCAGTGAACCCCTCCACCTTCTAGTAGGGTGCCTGTAGGTGTGCACGGGTCATTGTTT  
TGAAAGCAAGTCTGCCCTTGATTGGGTTGGTCTTGTAAATTCAGATCAATTACTGTGAGT  
AAATCAAAGTGTTCAAAGCAGGCTGCAAAGCTTGAATGGTTCAGCATGGAATAATAAGAT  
AAGACTTCGGTTTTGTTTTGTTGGCTATAGAACCAAAGTAATGATTGAAAGGGATAGTTG  
GGGGTGTAGTATTTCAGTGGTCAGCGGTGAAATGCGAGGACCCATTGAAGACTAACGTAT  
GCGAAAGCATTACCAAGGATATCTTTA

>T079b\_02

AGCTCCAATAGCATATGCTAACGTTGTTGCAGTTAAAAGGCTCGTAGTCGAAATTTATGGC  
CCTAGTGAACCCCTCCACCTTCTAGTAGGGTGCCTGTAGGTGTGCACGGGTCATTGTTT  
TGAAAGCAAGTCTGCCCTTGATTGGGTTGGTCTTGTAAATTCAGATCAATTACTGTGAGT  
AAATCAAAGTGTTCAAAGCAGGCTGCAAAGCTTGAATGGTTCAGCATGGAATAATAAGAT  
AAGACTTCGGTTTTGTTTTGTTGGCTATAGAACCAAAGTAATGATTGAAAGGGATAGTTG  
GGGGTGTAGTATTTCAGTGGTCAGCGGTGAAATGCGAGGACCCATTGAAGACTAACGTAT  
GCGAAAGCATTACCAAGGATATCTTTG

>T080a\_02

AGCTCCAATAGCATATGCTAAAGTTGTTGCAGTTAAAAGGCTCGTAGTCGAAATTTATGGC  
CCCAGTGAACCCCTCCACCTTCTAGTAGGGTGCCTGTAGGTGTGCACGGGTCATTGTTT  
TGAAAAGTAATGCTGCCCTTGATTGGGTTGGTATTGCAATTCAGATCTATTACTGTGAGT  
AAATCAAAGTGTTCAAAGCAGGCATTGTTGCCTGAATGGTTCAGCATGGAATAATAAGAT  
AAGACTTCGGTTTTATTTTGTGGCTATGAAACCAAAGTAATGATTGAAAGGGATAGTTG  
GGGGTGTAGTATTTCAGTGGTCAGCGGTGAAATGCTAGGACCCATTGAAGACTAACTTAT  
GCGAAAGCATTACCAAGGATATCTTCA

>T080b\_02

AGCTCCAATAGCATATGCTAAAGTTGTTGCAGTTAAAAGGCTCGTAGTCGAAATTTATGGC  
CCCAGTGAACCCCTCCACCTTCTAGTAGGGTGCCTGTAGGTGTGCACGGGTCATTGTTT  
TGAAAAGTACTGCTGCCCTTGATTGGGTTGGTTTTACAATTCAGATCTATTACTGTGAGT  
AAATCAAAGTGTTCAAAGCAGGCATTATTGCCTGAATGGTTCAGCATGGAATAATAAGAT  
AAGACTTCGGTTTTATTTTGTGGCTATGAAACCAAAGTAATGATTGAAAGGGATAGTTG  
GGGGTGTAGTATTTCAGTGGTCAGCGGTGAAATGCTAGGACCCATTGAAGACTAACTTAT  
GCGAAAGCATTACCAAGGATATCTTCA

>T081\_01

AGCTCCAATAGCATATGCTAAAGTTGTTGCAGTTAAAAGGCTCGTAGTCGAAATTTATGGC  
CCCAGTGAACCCCTCCACCTTCTAGTAGGGTGCCTGTAGGTGTGCACGGGTCATTGTTT  
TGAGAGCATGGCTGCCCTTGATTGGGTTGGTTTTGTGATTTCAGATCTATTACTGTGAGT

AAATCAAAGTGTTCAAAGCAGGCATTTTTGCTGAATGGTTCAGCATGGAATAATAAGA  
TAAGACTTTGGTTTTATTTTGGTTGGCTGTGAAACCAAAGTAATGATTGAAAGGGATAGTT  
GGGGTGTAGTATTCAGTGGTCAGCGGTGAAATGCGAGGACCCATTGAAGACTAECTTA  
TGCGAAAGCATTACCAAGGATATCTCA

>T082\_95

AGCTCCAATAGCATATGCTAAAGTTGTTGCAGTTAAAAGGCTCGTAGTCGAACCTTATGGC  
CCCAGTGAACCCCTCCACCTTCTAGTAGGGTGCCTGTTGGTGTGCACGGGTCATGTTTC  
TGAAAGCATAGCTGCCCTTGATTGGGTTGGTTTTGTAATTCAGATCAATTACTGTGAGT  
AAATCAAAGTGTTCAAAGCAGGCATCATTCCTGAATGGTTCAGCATGGAATAATAAGAT  
AAGACTTCGGTTTTATTCTGTTGGCTATGAAACCAAAGTAATGATTGAAAGGGATAGTTG  
GGGGTGTAGTATTCAGTGGTCAGCGGTGAAATGCGAGGACCCATTGAAGACTAECTTA  
GCGAAAGCATTACCAAGGATATCTCA

>T083\_02

AGCTCCAATAGCATATGCTAACGTTGTTGCAGTTAAAAGGCTCGTAGTCGAATTTATGAC  
CCTAGTGAACCCCTCCACCTTCTAGTAGGGTGCCTGTYGGTGTGCACGGGTCATTGTTTC  
TGAAAGCAAGTCTGCCCTTGATTGGGTYGGTCTTGTAAATTCAGATCTATTACTGTGAGT  
AAATCAGAGTGTTCAAAGCAGGCAGCAATGCCTGAATGGTTCAGCATGGAATAATAAGAT  
AAGACTTTGGTYTATTTTTATTGGCTATAGAATCAAAGTAATGATTGAAAGGGATAGTTG  
GGGGTGTAGTATTCAGTGGTCAGCGGTGAAATGCGAGGACCCATTGAAGACTAECTTA  
GCGAAAGCATTACCAAGGATATCTTTG

>T084\_13

AGCTCCAATAGCATATGCTAACGTTGTTGCAGTTAAAAGGCTCGTAGTCGAATTTATGAC  
CCCAGTGAACCCCTCCACCTTCTAGTAGGGTGCCTGTYGGTGTGCACGGGTCATTGTTTC  
TGAAAGCAAGTCTGCCCTTGATTGGGTYGGTCTTGTAAATTCAGATCTATTACTGTGAGT  
AAATCAGAGTGTTCAAAGCAGGCAGCAATGCCTGAATGGTTCAGCATGGAATAATAAGAT  
AAGACTTTGGTYTATTTTTATTGGCTATAGAATCAAAGTAATGATTGAAAGGGATAGTTG  
GGGGTGTAGTATTCAGTGGTCAGCGGTGAAATGCGAGGACCCATTGAAGACTAECTTA  
GCGAAAGCATTACCAAGGATATCTTTG

>T085\_06

AGCTCCAATAGCATATGCTAAAGTTGTTGCAGTTAAAAGGCTCGTAGTCGAATTTATGAC  
CCTAGTGAACCCCTCCACCTTCTAGTAGGGTGCCTGTYGGTGTGCACGGGTCATTGTTTC  
TGAAAGCAAGTCTGCCCTTGATTGGGTYGGTCTTGTAAATTCAGATCTATTACTGTGAGT  
AAATCAAAGTGTTCAAAGCAGGCAGCAATGCCTGAATGGTTCAGCATGGAATAATAAGAT  
AAGACTTTGGTYTATTTTTATTGGCTATAGAATCAAAGTAATGATTGAAAGGGATAGTTG  
GGGGTGTAGTATTCAGTGGTCAGCGGTGAAATGCGAGGACCCATTGAAGACTAECTTA  
GCGAAAGCATTACCAAGGATATCTTTG

>T086\_01

AGCTCCAATAGCATATGCTAAAGTTGTTGCAGTTAAAAGGCTCGTAGTCGAATTTATGAC  
CCCAGTGAACCCCTCCACCTTCTAGTAGGGTGCCTGTYGGTGTGCACGGGTCATTGTTTC  
CTGGAAAGCAGGGCTGCCCTTGATTGGGTYGGTCTTGTAAATTCAGATCTATTACTGTGAG  
TAAATCAAAGTGTTCAAAGCAGGCAGCAATGCCTGAATGGTTCAGCATGGAATAATAAGA  
TAAGACTTCGGTTTTATTTTTGTTGGCTATAGAATCAAAGTAATGATTGAAAGGGATAGTTG  
GGGGTGTAGTATTCAGTGGTCAGCGGTGAAATGCGAGGACCCATTGAAGACTAECTTA  
TGCGAAAGCATTACCAAGGATATCTTTG

>T087\_03

AGCTCCAATAGCATATGCTAAAGTTGTTGCAGTTAAAAGGCTCGTAGTCGAATTTATGAC  
CCCAGTGAACCCCTCCACCTTCTAGTAGGGTGCCTGTYGGTGTGCACGGGTCATTGTTTC  
TGAAAGCAGGTCTGCCCTTGATTGGGTYGGTCTTGTAAATTCAGATCTATTACTGTGAGT  
AAATCAAAGTGTTCAAAGCAGGCAGCGATGCCTGAATGGTTCAGCATGGAATAATAAGAT  
AAGACTTTGGTTTTATTTTTGTTGGCTATAGAATCAAAGTAATGATTGAAAGGGATAGTTG  
GGGGTGTAGTATTCAGTGGTCAGCGGTGAAATGCGAGGACCCATTGAAGACTAECTTA  
GCGAAAGCATTACCAAGGATATCTTTG

>T088\_04

AGCTCCAATAGCATATGCTAAAGTTGTTGCAGTTAAAAGGCTCGTAGTCGAATGTATGAC  
CCCAGTGAACCAATCCACCTCCAAGTTGGGGTGCCTGTTTGTGTGCACGGGTCATTCTT  
CTGGAGAGCAAACTGCCCTTGATTGGGTYGGTCTTGTAAATTCAGATCAATTACTGTGA  
GTAAATCAAAGTGTTCAAAGCAGGCAGCATTGCCTGAATGGTTCAGCATGGAATAATAAG  
ATAAGACTTCGGTTTTATGTTGTTGGCTATGGAACCAAGTAATGATTGAAAGGGATAG  
TTGGGGTGTAGTATTCAGTGGTCAGCGGTGAAATGCGAGGACCCATTGAAGACTAECT  
TATGCGAAAGCATTACCAAGGATATCTTTG

>T089\_02

AGCTCCAATAGCATATGCTAAAGTTGTTGCAGTTAAAAGGCTCGTAGTCGAATTTATGGC  
CCCAGTGCACCCCTCCACCTTCTTGTAGGGTGCCTGTTGGTGTGCACGGGTCATTGTT  
CTGAAGAGCAAGTCTGCCCTTGATTGGGTYGGTCTTGTAAATTCAGATCTATTACTGTGAG

TAAATCAAAGTGTTCAAAGCAGGCAGCGATGCCTGAATGGTTCAGCATGGAATAATAAGA  
TAAGACTTCGGTTTTATTTTGTGGCTATAGAACCAAAGTAATGATTGAAAGGGATAGTT  
GGGGTGCTAGTATTCAGTGGTCAGCGGTGAAATGCGAGGACCCATTGAAGACTAECTTA  
TGCGAAAGCATTACCAAGGATATCTTTG  
>T090\_01  
AGCTCCAATAGCATATGCTAAAGTTGTTGCAGTTAAAAGGCTCGTAGTCGAATTTATGAC  
TCCAGTGAACCCCTCCACTCTCTAGTAGGGTGCGTGTAGGTGTGCACGAGTCATTGTTT  
TGAAGAGCATGGCTGCCCTTGATTGGGTGGTTATGTAATTCAGATCCATTACTGTGAGT  
AAATCAAAGTGTTCAAAGCAGGCAGCAATGCCTGAATGGTTCAGCATGGAATAATAAGAT  
AAGACTTCGGTTTTATTTTGTGGCTATAGAACCAAAGTAATGATTGAAAGGGATAGTTG  
GGGGTGCTAGTATTCAGTGGTCAGCGGTGAAATGCTAGGACCCATTGAAGACTAECTTA  
GCGAAAGCATTACCAAGGATATCTTTG  
>T091\_01  
AGCTCCAATAGCATATGCTAAAGTTGTTGCAGTTAAAAGGCTCGTAGTCGAATCTATGAC  
TCGGTGAACCTGTCCACCTTCTAGTAGGGTGCGTGTAGTGTGCACTAGTCATTTTTCT  
GAAAAGCTTGGCTGCCCTTGATTGGGTGGTTTTGTCAATTCAGATCCATTACTGTGAGT  
AAATCAAAGTGTTCAAAGCAGGCAGCAATGCCTGAATGGTTCAGCATGGAATAATAAGAT  
AAGACTTTGGTTTTATTTTGTGGCTATAGAACCAAAGTAATGATTGAAAGGGATAGTTG  
GGGGTGCTAGTATTCAGTGGTCAGCGGTGAAATGCGAGGACCCATTGAAGACTAECTTA  
GCGAAAGCATTACCAAGGATATCTTTG  
>T092\_08  
AGCTCCAATAGCATATGCTAAAGTTGTTGCAGTTAAAAGGCTCGTAGTCGAATTTATGAC  
TTKGTGAACCTATCCACCTCTAGTAGGGTGCGTGGTGGYGTGCACTGGTCATTGTTCT  
GAAAAGCTTGGCTTCCCTTGATTGGGTGGTTCATGTCAATTCAGATCCATTACTGTGAGT  
AAATCAAAGTGTTCAAAGCAGGCAGCAATGCCTGAATGGTTCAGCATGGAATAATAAGAT  
AAGACTTTGGTTTTATTTTGTGGCTATAGAACCAAAGTAATGATTGAAAGGGATAGTTG  
GGGGTGCTAGTATTCAGTGGTCAGCGGTGAAATGCGAGGACCCATTGAAGACTAECTTA  
GCGAAAGCATTACCAAGGATATCTTTG  
>T101\_01  
AGCTCCAATAGCGTATGCTAAAGTTGTTGCAGTTAAAAGGCTCGTAGTCGAACCTTATGGT  
CCTGTGAACCTGACCCATCCTCTAGTAGGTTGCGAGTCGGTGTGCACGGATCATCCTTCT  
GAAAATCAAGCTGCCCTTCACTGGGTGGCCTGACAATTCAGATCATTTACTGTGAGTA  
AATCAAAGTGTTCAAAGCAGGCCTTAATGCTTGTATGGTTCAGCATGGAATAATAAGATA  
AGACTTTGGTTTTGTTTTGTTGGCTAGAGAACCAAAGTAATGATTGAAAGGGATAGTTG  
GGGTGCTAGTATTCATGGTCAGCGGTGAAATGCGAGGACCCATTGAAGACTAECTTATG  
CGAAAGCATTACCAAGGATATCTTCT  
>T102\_01  
AGCTCCAATAGCGTATGCTAAAGTTGTTGCAGTTAAAAGGCTCGTAGTCGAACCTTATGGC  
CCTGTGAACCCGGCCCATCCTCTAGTAGGTTGCGAGCTGGTGTGCACGGGTCATTTTTCT  
GAAGAGTATTGCTGCCCTTGATTGGGTCTTGCAATATAATTCAGATCATTTACTGTGAGT  
AAATCAAAGTGTTCAAAGCAGGCCTTAATGCTTGTATGGTTCAGCATGGAATAATAAGAT  
AAGACTTCGGTTTTGTTTTGTTGGCTATAGAACCAAAGTAATGATTGAAAGGGATAGTTG  
GGGGTGCTAGTATTCAGTGGTCAGCGGTGAAATGCGAGGACCCATTGAAGACTAECTTAT  
GCGAAAGCATTACCAAGGATATCTTCT  
>T103\_235  
AGCTCCAATAGCGTATGCTAAAGTTGTTGCAGTTAAAAGGCTCGTAGTCGAACCTTATGGC  
CTCGTGAACCCCTCCCATCCTCTAGTAGGTTGCGAGAAGGTGTCATGGGTCATTCTTCT  
GAAAAGTATTGCTGCCCTTGATTGGGYTTGCTCTATAATTCAGATCATTTACTGTGAGT  
AAATCAAAGTGTTCAAAGCAGGCCTTAAGCTTGTATGGTTCAGCATGGAATAATAAGAT  
AAGACTTCGGTTTTGTTTTGTTGGCTATAGAACCAAAGTAATGATTGAAAGGGATAGTTG  
GGGATGCTAGTATTCAGTGGTCAGCGGTGAAATGCGAGGACCCATTGAAGACTAECTTAT  
GCGAAAGCATTACCAAGGATATCTTCT  
>T104\_07  
AGCTCCAATAGCGTATGCTAAAGTTGTTGCAGTTAAAAGGCTCGTAGTCGAACCTTATGGC  
TCTGTGAACCTGACCCATCCTCTAGTAGGTTGCGAGTTGGTGTGCACGGGTCATTCTTCT  
GAAAAGCATTACTGCCCTTGATTGGGTGGTGTGTAATTCAGATCATTTACTGTGAGT  
AAATCAAAGTGTTCAAAGCAGGCCTTAATGCTTGTATGGTTCAGCATGGAATAATAAGATA  
AGACCTCGGTTTTGTTTTATTTGGCTATAGAACCAAAGTAATGATTGAAAGGGATAGTTG  
GGGTGCTAGTATTCAGTGGTCAGCGGTGAAATGCGAGGACCCATTGAAGACTAECTTATG  
CGAAAGCATTACCAAGGATATCTTCT  
>T105\_77  
AGCTCCAATAGCGTATGCTAAAGTTGTTGCAGTTAAAAGGCTCGTAGTCGAACCTTATGGC  
CCTGTGAACCTGACCCATTCTCTAGTAGATTGCGAGTTGGTGTGCACGGGTCATTCTTCT  
GAAAAGCATTACTGCCCTTGATTGGGTGGTATTGTAATTCAGATCATTTACTGTGAGT



AAATCAAAGTGTTCAAAGCAGGCTATAATGCTTGTATGGTTCAGCATGGAATAATAAGAT  
AAGACCTCGTTTTGTTTTGTTGGCTATGGAACCAAGGTAATGATTGAAAGGGATAGTTG  
GGGGTGTAGTATTAGTGGTCAGCGGTGAAATGCGAGGACCCATTGAAGACTAACTTAT  
GCGAAAGCATTACCAAGGATATCTTCT

>T106\_02

AGCTCCAATAGCGTATATTAAGTTGCTGCAGTTAAAAGGCTCGTAGTCGAACTTATGGC  
CCAGTGAACCTGATCCATCCTCTAGTAGGTTGCGAATCGGTGTGCACGGGTCATTCTTCT  
GAAGAGCATGGCTTCCCTTGATTGGGTTTGTTCATGTAATTCAGATCATTTACTGTGAGTA  
AATCAAAGTGTTCAAAGCAGGCTTAAATGCTTGTATGGTTCAGCATGGAATAATAAGATA  
AGACTTCGGTTTTGTTTTGTTGGCTATAGAACCAAAGTAATGATTGAAAGGGATAGTTGG  
GGGTGCTAGTATTGAGTGGTCAGCGGTGAAATGCGAGGACCCACTCAAGACTAACTTATG  
CGAAAGCATTACCAAGGATATCTTCT

>T107\_01

AGCTCCAATAGCGTATGCTAAAGTTGTTGCAGTTAAAAGGCTCGTAGTCGAACTTATGGC  
CCTGTGAACCTGACCCATCCTCTAGTAGGTTGCGAGTCGGTGTGCACGGGTCATTTTTCT  
GAAGAGCATGGCTCGTCCCTTGATTGGGTTGGTCATGTAATTCAGATCATTTACTGTGAG  
TAAATCAAAGTGTTCAAAGCAGGCTATAATGCTTGTATGGTTCAGCATGGAATAATAAGA  
TAAGACTTCGGTTTTATTTTGTGGCTATAGAACCAAAGTAATGATTGAAAGGGATAGTT  
GGGGTGTAGTATTAGTGGTCAGCGGTGAAATGCGAGGACCCATTGAAGACTAACTTA  
TGCGAAAGCATTACCAAGGATATCTTCT

>T108\_03

AGCTCCAATAGCGTATGCTAAAGTTGTTGCAGTTAAAAGGCTCGTAGTCGAACTTATGGC  
CCTGTGAACCTGACCCATCCTCTAGTAGGTTGCGAGTCGGTGTGCACGGGTCATTTTTCT  
GAAGAGCATGGCTGCCCTTGATTGGGTTGGTCATGTAATTCAGATCATTTACTGTGAGTA  
AATCAAAGTGTTCAAAGCAGGCTATAATGCTTGTATGGTTCAGCATGGAATAATAAGATA  
AGACCTCGGTTTTGTTTTATTTGGCTATAGAACCAAAGTAATGATTGAAAGGGATAGTTGG  
GGGTGCTAGTATTAGTGGTCAGCGGTGAAATGCGAGGACCCATTGAAGACTAACTTATG  
CGAAAGCATTACCAAGGATATCTTCT

>T109\_03

AGCTCCAATAGCGTATGCTAAAGTTGTTGCAGTTAAAAGGCTCGTAGTCGAACTTATGGC  
CCTGTGAACCTACTCATCCTCTAGTGGGATGCGCGTAGGTGTGCACGGGTCATTCTTCT  
AAAAGCAATTGCTGCCCTTGATTGGGTTGGTGATGTAATTCAGATCATTTACTGTGAGT  
GAATCAAAGTGTTCAAAGCAGGCTCAATGCTTGTATGGTTCAGCATGGAATAATAAGAT  
AAGACTTCGGTTTTATTTTGTGGCTATAGAACCAAAGTAATGATTGAAAGGGATAGTTG  
GGGGTGTAGTATTAGTGGTCAGCGGTGAAATGCGAGGACCCATTGAAGACTAACTTATG  
GCGAAAGCATTACCAAGGATATCTTCT

>T110\_01

AGCTCCAATAGCGTATGCTAAAGTTGTTGCAGTTAAAAGGCTCGTAGTCGAACTTTGGC  
CCTGTGAACCTGGCCCAGTCTTTACGGCTGCGAGTTGGTGTGCACGGGTCATTCTTCTGA  
AGAGCATTGCTGCCCTTGATTGGGTTGGTGATGTAATTCAGATCATTTACTGTGAGTAAA  
TCAAAGTGTTCAAAGCAGGCTTAAATGCTTGTATGGTTCAGCATGGAATAATAAGATAAG  
ACTTCGGTTTTATTTTGTGGCTATAGAACCAAAGTAATGATTGAAAGGGATAGTTGGGG  
GTGCTAGTATTAGTGGTCAGCGGTGAAATGCGAGGACCCATTGAAGACTAACTTATGCG  
AAAGCATTACCAAGGATATCTTCT

>T111\_01

AGCTCCAATAGCGTATGCTAAAGTTGTTGCAGTTAAAAGGCTCGTAGTCGAACTTATGGC  
CATGTGAACCCGGCCCATCCTCTAGTAGGTTGCGAGCTGGTGTGCACGGGTCATTCTTCT  
GAAAAGCATTGCTGCCCTTGATTGGGTTTGTGATGTAATTCAGATCATTTACTGTGAGTA  
AATCAAAGTGTTCAAAGCAGGCTTAAATGCTTGTATGGTTCAGCATGGAATAATAAGATA  
AGACTTCGGTTTTGTTTTGTTGGCTATGGAACCAAAGTAATGATTGAAAGGGATAGTTGG  
GGGTGCTAGTATTAGTGGTCAGCGGTGAAATGCGAGGACCCACTGAAGACTAACTTATG  
CGAAAGCATTACCAAGGATATCTTCT

>T112\_05

AGCTCCAATAGCGTATGCTAAAGTTGTTGCAGTTAAAAGGCTCGTAGTCGAACTTATGAC  
YCTGTGAACCCGGCCCATCCTCTAGTAGGTTGCGAGCTGGTGTGCACGGGTCATTCTTCT  
GAAAAGCATTGCTGCCCTTGATTGGGTTTGTGATGTAATTCAGATCATTTACTGTGAGT  
AAATCAAAGTGTTCAAAGCAGGCTTAAATGCTTGTATGGTTCAGCATGGAATAATAAGAT  
AAGACTTCGGTTTTATTTTGTGGCTATAGAACCAAAGTAATGATTGAAAGGGATAGTTG  
GGGGTGTAGTATTAGTGGTCAGCGGTGAAATGCGAGGACCCACTGAAGACTAACTTATG  
GCGAAAGCATTACCAAGGATATCTTCT

>T113\_01

AGCTCCAATAGCGTATGCTAAAGTTGTTGCAGTTAAAAGGCTCGTAGTCGAACTTATGGC  
CCTGTGAACCTAGCCCATGCTCTAGTAGCTTGCAGCTGGTGTGCACGGGTCATTCTTCT  
GAAAAGCATTGCTGCCCTTGATTGGGTTTGTGATGTAATTCAGATCATTTACTGTGAGTAA

ATCAAAGTGTCAAAGCAGGCTTTAATGCTTGTATGGTTCAGCATGGAATAATAAGATAA  
GACTTCGGTTTTATTTTGTGGCTATAGAACCAAAGTAATGATTGAAAGGGATAGTTGGG  
GGTGTAGTATTTCAGTGGTCAGCGGTGAAATGCGAGGACCCACTGAAGACTAACTTATGC  
GAAAGCATTACCAAGGATATCTTCT

>T114\_05

AGCTCCAATAGCGTATGCTAAAGTTGTTGCAGTTAAAAGGCTCGTAGTCGAACTTATGGC  
CCTGTGAACCTAGCCCATGCTCTAGTAGCTTGC GCGCTGGTGTGCACGGGTCATTCTTCT  
GAAAAGCATTGCTTTCCCTTCGCTGGGTTTGTGATGTAATTCAGATCATTTACTGTGAGT  
AAATCAAAGTGTCAAAGCAGGCTTTAATGCTTGTATGGTTCAGCATGGAATAATAAGAT  
AAGACTTCGGTTTTATTTTGTGGCTATAGAACCAAAGTAATGATTGACAGGGATAGTTG  
GGGGTGTAGTATTTCAGTGGTCAGCGGTGAAATGCGAGGACCCACTGAAGACTAACTTAT  
GCGAAAGCATTACCAAGGATATCTTCT

>T115\_02

AGCTCCAATAGCGTATGCTAAAGTTGTTGCAGTTAAAAGGCTCGTAGTCGAACTTATGGC  
CCTGTGAACCCAGCCCATCCTCTAGTAGGTTGCGTGCAGGTGTGCACGGGTCATTCTTCT  
GAAGAGCATTCTGCCCTTGATTGGGTTGGAATGTAATTCAGATCATTTACTGTGAGTA  
AATCAAAGTGTCAAAGCAGGCTTTAATGCTTGTATGGTTCAGCATGGAATAATAAGATA  
AGACTTCGGTTTTRTTTTTGTGGCTWTAGAACCAAAGTAATGATTGAAAGGGATAGTTGG  
GGGTGTAGTATTGAGTGGTCAGCGGTGAAATGCGWGGACCCACTCAAGACTAACTTATG  
CGAAAGCATTACCAAGGATATCTTCT

>T116\_01

AGCTCCAATAGCGTATGCTAAAGTTGTTGCAGTTAAAAGGCTCGTAGTCGAACTTATGAC  
CCTGTGAACCTGGTCCATCCATACATTTTGTGGTTGCGTTTTCCGGAGTGCACGGGTCAT  
TTTTCTGAAGAGCATTCTGCCCTTGATTGGGTTTCGGAATGTAATTCAGATCATTTAC  
TGTGAGTAAATCAAAGTGTCAAAGCAGGCTTTAATGCTTGTATGGTTCAGCATGGAATA  
ATAAGATAAGACTTCGGTTTTGTTTTGTGGCTATGGAACCAAAGTAATGATTGAAAGGG  
ATAGTTGGGGTGTAGTATTTCAGTGGTCAGCGGTGAAATGCGAGGACCCATTGAAGACT  
AACTTATGCGAAAGCATTACCAAGGATATCTTCT

>T117\_01

AGCTCCAATAGCGTATGCTAAAGTTGTTGCAGTTAAAAGGCTCGTAGTCGAACTTATGGC  
CCTGTGAACCCGGTCCATCCTTCTGGTTGCGTTCCGGTGTGCACGGGTCATTTTTCTGA  
AGAGCATCTTCGCACTTGATTGTGCTGGGATGTAATTCAGATCATTTACTGTGAGTAAA  
TCAAAGTGTCAAAGCAGGCTTTAATGCTTGTATGGTTCAGCATGGAATAATAAGATAAG  
ACTTCGGTTTTATTTTGTGGCTAGGGAACCAAAGTAATGATTGAAAGGGATAGTTGGG  
GTGCTAGTATTTCAGTGGTCAGCGGTGAAATGCGAGGACCCATTGAAGACTAACTTATGCG  
AAAGCATTACCAAGGATATCTTCT

>T118\_01

AGCTCCAATAGCGTATGCTAAAGTTGTTGCAGTTAAAAGGCTCGTAGTCGAACTTATGTC  
CCTGTGCACCCGGCCATCCTCTAGTAGGTTGCGCGCTGGAGTGCACGGGACATTCTTCT  
TGAAGAGCATTCTGCCCTTGATTGGGTTCCGAKATGTAATTCAGATCATTTACTGTGAG  
TAAATCAAAGTGTCAAAGCAGGCTTTATGCCTGAATGGTTCAGCATGGAATAATAAGA  
TAAGACTTCGGTTTTGTTTTGTGGCTATAGAACCAAAGTAATGATTGAAAGGGATAGTTG  
GGGGTGTAGTATTATATGTTGTCAGCGGTGAAATGCGAGGACCCATTGAAGACTAACTTA  
TGCGAAAGCATTACCAAGGATATCTTCT

>T119\_12

AGCTCCAATAGCGTATGCTAAAGTTGTTGCAGTTAAAAGGCTCGTAGTCGAACTTATGAC  
CCTGTGCACCTGGCCCATCCTCTAGTAGGTTGCGAGCTGGTGTGC GCGGGTCATTCTTCT  
GAAGAGCATTCTGCCCTTGATTGGGTTCCGGAATTGTAATTCAGATCATTTACTGTGAGT  
AAATCAAAGTGTCAAAGCAGGCTTTATGCCTGAATGGTTCAGCATGGAATAATAAGAT  
AAGACTTCGGTTTTATTTTGTGGCTATAGAACCAAAGTAATGATTGAAAGGGATAGTTG  
GGGGTGTAGTATTCCATGGTTCAGCGGTGAAATGCGAGGACCCATTGAAGACTAACTTAT  
GCGAAAGCATTACCAAGGATATCTTCT

>T120\_01

AGCTCCAATAGCGTATGCTAAAGTTGTTGCAGTTAAAAGGCTCGTAGTCGAACTTATGAT  
CCTGTGCACCTGGCCCATCCTCTAGTAGGTTGCGCGCTGGTGTGC GCGGATCATTCTTCT  
GAAGAGCATTCTGCCCTTGATTGGGTTCCGGAATTGTAATTCAGATCATTTACTGTGAGT  
AAATCAAAGTGTCAAAGCAGGCTTTATGCCTGAATGGTTCAGCATGGAATAATAAGAT  
AAGACTTCGGTTTTGTTTTGTGGCTATAGAACCAAAGTAATGATTGAAAGGGATAGTTG  
GGGGTGTAGTATTATGTTGTCAGCGGTGAAATGCGGGGACCCATTGAAGACTAACTTAT  
GCGAAAGCATTACCAAGGATATCTTCT

>T121a\_02

AGCTCCAATAGCGTATGCTAAAGTTGTTGCAGTTAAAAGGCTCGTAGTCGAACTTATGAC  
CCTGTGAACCCAGCCCATCCTCTAGTAGGTTGCGTGCAGGTGTGCACGGGTCATTCTTCT  
GAAGAGCATGCTGCCCTTGATTGGGTTGGATATGTAATTCAGATCATTTACTGTGAGTA

AATCAAAGTGTTCAAAGCAGGCTTTAATGCTTGTATGGTTCAGCATGGAATAATAAGATA  
AGACTTCGGTTTTGTTTTGTTGGCTATAGAACCAAAGTAATGATTGAAAGGGATAGTTGG  
GGGTGCTAGTATTCCATGGTCAGCGGTGAAATGCAAGGACCCATGGAAGACTAACTTATG  
CGAAAGCATTACCAAGGATATCTTCT

>T121b\_19

AGCTCCAATAGCGTATGCTAAAGTTGTTGCAGTTAAAAGGCTCGTAGTCGAACTTATGGC  
CCTGTGAACCCAGCCATCCTCTAGTAGGTTGCGTGCAGGTGTCACGGGTCATTCTTCT  
GAAGAGCATTCTGCCCTTGATTGGGTTGGAATGTAATTCAGATCATTTACTGTGAGTA  
AATCAAAGTGTTCAAAGCAGGCTTTAATGCTTGTATGGTTCAGCATGGAATAATAAGATA  
AGACTTCGGTTTTGTTTTGTTGGCTATAGAACCAAAGTAATGATTGAAAGGGATAGTTGG  
GGGTGCTAGTATTCCATGGTCAGCGGTGAAATGCGAGGACCCATGGAAGACTAACTTATG  
CGAAAGCATTACCAAGGATATCTTCT

>T122\_01

AGCTCCAATAGCGTATGCTAAAGTTGTTGCAGTTAAAAGGCTCGTAGTCGAACTTATGGC  
CCTGTGAACCCGTCCATCCGCTAGTCGGTTGCGAACAGGTGTCACGGGTCATTCTTCT  
GAAGAGCATTCTGCCCTTGATTGGGTTGGAGATGTAATTCAGATCATTTACTGTGAGTA  
AATCAAAGTGTTCAAAGCAGGCTTTAATGCTTGTATGGTTCAGCATGGAATAATAAGATA  
AGACTTCGGTTTTGTTTTGTTGGCTATAGAACCAAAGTAATGATTGAAAGGGATAGTTGG  
GGGTGCTAGTATTCCATGGTCAGCGGTGAAATGCGAGGACCCATGGAAGACTAACTTATG  
CGAAAGCATTACCAAGGATATCTTCT

>T123\_01

AGCTCCAATAGCGTATGCTAAAGTTGTTGCAGTTAAAAGGCTCGTAGTCGAACTTATGGC  
CCAGTGAACCCGTCCATCCTCTAGTAGGTTGCGAACAGGTGTCACGGGTCATTCTTCT  
GAAAGCATTCTGCCCTTGATTGGGTTGGAGATGTAATTCAGATCATTTACTGTGAGTA  
AATCAAAGTGTTCAAAGCAGGCTTTAATGCTTGTATGGTTCAGCATGGAATAATAAGATA  
AGACTTCGGTTTTGTTTTGTTGGCTATAGAACCAAAGTAATGATTGAAAGGGATAGTTGG  
GGGTGCTAGTATTCCATGGTCAGCGGTGAAATGCGAGGACCCATGGAAGACTAACTTATG  
CGAAAGCATTACCAAGGATATCTTCT

>T124\_01

AGCTCCAATAGCGTATGCTAAAGTTGTTGCAGTTAAAAGGCTCGTAGTCGAACTTATGGC  
CCTGTGAACCCGTCCATCCTCGAGTAGGTTGCGAACAGGAGTGCACGGGTCATTCTTCT  
GAAGAGCATTCTGCCCTTGATTGGGTTGGAGATGTAATTCAGATCATTTACTGTGAGTA  
AATCAAAGTGTTCAAAGCAGGCTATAATGCTTGTATGGTTCAGCATGGAATAATAAGATA  
AGACCTCGGTTTTGTTTTGTTGGCTATAGAACCAAAGTAATGATTGAAAGGGATAGTTGG  
GGGTGCTAGTATTCCATGGTCAGCGGTGAAATGCGAGGACCCATGGAAGACTAACTTATG  
CGAAAGCATTACCAAGGATATCTTCT

>T125\_09

AGCTCCAATAGCGTATGCTAAAGTTGTTGCAGTTAAAAGGCTCGTAGTCGAACTTTTGGC  
CCTGTGAACCCCATCCATCCTCGAGTAGGTTGCGTTATGGGAGTGCACGGGTCATTCTTC  
TGAAGAGCATTCTCCCCTTGATTGGGTTGAGATGTAATTCAGATCATTTACTGTGAG  
TAAATCAAAGTGTTCAAAGCAGGCTTTAATGCTTGTATGGTTCAGCATGGAATAATAAGA  
TAAGACTTCGGTTTTGTTTTGTTGGCTATAGAACCAAAGTAATGATTGAAAGGGATAGTTGG  
GGGGTGTAGTATTCCATGGTCAGCGGTGAAATGCGAGGACCCATGGAAGACTAACTTATG  
TGC GAAAGCATTACCAAGGATATCTTCT

>T126\_21

AGCTCCAATAGCGTATGCTAAAGTTGTTGCAGTTAAAAGGCTCGTAGTCGAACTTATGGC  
CCTGTGAACCCGTCCATCCTCGAGTAGGTTGCGAACAGGAGTGCACGGGTCATTCTTCT  
GAAGAGCATTCTGCCCTTGATTGGGTTGGAGATGTAATTCAGATCATTTACTGTGAGTA  
AATCAAAGTGTTCAAAGCAGGCTATAATGCTTGTATGGTTCAGCATGGAATAATAAGATA  
AGACTTCGGTTTTGTTTTGTTGGCTATAGAACCAAAGTAATGATTGAAAGGGATAGTTGG  
GGGTGCTAGTATTCCATGGTCAGCGGTGAAATGCGAGGACCCATGGAAGACTAACTTATG  
CGAAAGCATTACCAAGGATATCTTCT

>T127\_06

AGCTCCAATAGCGTATGCTAAAGTTGTTGCAGTTAAAAGGCTCGTAGTCGAACTTATGGC  
CCTGTGAACCTGGCCCATCCTCTAGTGGGTTGCGCGCCGGTGTGCACGGGTCATTTTTCT  
GAAGAGCATTGCTGCCCTTGATTGGGTTGGTATGTAATTCAGATCATTTACTGTGAGTA  
AATCAAAGTGTTCAAAGCAGGCTTTAATGCTTGTATGGTTCAGCATGGAATAATAAGATA  
AGACTTCGGTTTTATTTTGTGGCTATAGAACCAAAGTAATGATTGAAAGGGATAGTTGG  
GGGTGCTAGTATTCCATGGTCAGCGGTGAAATGCGAGGACCCATGGAAGACTAACTTATG  
CGAAAGCATTACCAAGGATATCTTCT

>T128\_01

AGCTCCAATAGCGTATGCTAAAGTTGTTGCAGTTAAAAGGCTCGTAGTCGAACTTATGAT  
CCTGTGAACCTGGCCCATCCTCTAGTAGGTTGAGTGTGGTGTGCACGGATCATTTTTCT  
TGAAGAGCATTGCTGCCCTTGATTGGGTTGGTATGTAATTCAGATCATTTACTGTGAGT

AAATCAAAGTGTTCAAAGCAGGCTTTAATGCTTGTATGGTTCAGCATGGAATAATAAGAT  
AAGACTTCGGTTTTATTTTGTGGCTATAATAGAACCAAAGTAATGATTGAAAGGGATAG  
TTGGGGGTGCTAGTATTCAGTGGTTAGCGGTGAAATGCGAGGACCCATTGAAGACTAACT  
TATGCCAAAAGCATTACCAAGGATATCTTCT

>T129\_03

AGCTCCAATAGCGTATGCTAAAGTTGTTGCAGTTAAAAGGCTCGTAGTCGAACTTATGGT  
CCTGTGAACCTGGCCCATCTTCTAGTAAGTTGCGCGCCGGTGTGCACGGATCATTCTTCT  
GAAAAGCATTGCTGCCCTTGTAGTGGGTTGGTGTATGTAATTCRGATCATTACTGTGAGTA  
AATCAAAGTGTTCAAAGCAGGCTTTAATGCTTGTATGGTTCAGCATGGAATAATAAGATA  
AGACTTCGGTTTTGTTTTGTTGGCTATAAGAACCAAAGTAATGATTGAAAGGGATAGTTGG  
GGGTGCTAGTATTCAGTGGTCAGCGGTGAAATGCGAGGACCCACTGAAGACTAACTTATG  
CGAAAGCATTACCAAGGATATTTTCT

>T130\_01

AGCTCCAATAGCGTATGCTAAAGTTGTTGCAGTTAAAAGGCTCGTAGTCGAACTTATGAC  
CCTGTGAACCTGGCCCATCTTCTAGTAGTTGCGCGCCGGTGTGCACGGGTCATTCTTCT  
GAAGAGCATTGCTGCCCTTGTGGGTTGGTAATGTAATTCAGATCATTACTGTGAGTA  
AATCAAAGTGTTCAAAGCAGGCAATTCGCTTGTATGGTTCAGCATGGAATAATAAGATAA  
GACTTCGGTTTTGTTTTGTTGGCTATAAGAACCAAAGTAATGATTGAAAGGGATAGTTGGG  
GGTGTAGTATTCAGTGGTCAGCGGTGAAATGCGAGGACCCACTGAAGACTAACTTATG  
GAAAGCATTACCAAGGATATCTTCT

>T131\_05

AGCTCCAATAGCGTATGCTAATACTGTTGCAGTTAAAAGGCTCGTAGTCGAACTTATGAC  
CCTGTGAACCTGGCCCATCTTCTAGTAGTTTGGCGCCGGTGTGCACGGGTCACATATGA  
TTTTCTGAAGAGCGGTTGCTGCCCTTGTATTGGGTTGGTGGCGTAATTCAGATCGTTTACT  
GTGAGTAAATCAGAGTGTTCAAAGCAGGCTTTTTTGAATAATGCTTGTATGGTTCAGCATG  
GAATAATAAGATAAGACTTTGGTTTTATTTTGTGGCTTGATAGAACCAGTAATGATT  
GAGAGGGATAGTTGGGGGTGCTAGTATTCAGTGGTCAGCGGTGAAATGCGAGGACCCATT  
GAAGACTAACTTATGCGAAAGCATTACCAAGGATATCTTCT

>T132\_01

AGCTCCAATAGCGTATGCTAATACTGTTGCAGTTAAAAGGCTCGTAGTCGAACTTATGAC  
CCTGTGAACCTGGCCCATCTTCTAGTAGTTTGGCGCCGGTGTGCACGGGTCATTCTTCT  
GAAGAGCACTGCTGCCCTTGTGGGTCGGCCGTGTGATTCAGATCATTACTGTGAGTA  
AATCAAAGTGTTCAAAGCAGGCTTTAATGCTTGTATGGTTCAGCATGGAATAATAAGATA  
AGACTTTGGTTTTGTTTTGTTGGCTCTCGAACCAAAGTAATGATTGAAAGGGATAGTTGG  
GGGTGCTAGTATTCAGTGGTCAGCGGTGAAATGCGAGGACCCATTGAAGACTAACTTATG  
CGAAAGCATTACCAAGGATATCTTCT

>T133\_14

AGCTCCAATAGCGTATGCTAATACTGTTGCAGTTAAAAGGCTCGTAGTCGAACTTATGAC  
CCTGTAGAACCTGGCCCATCTTCTAGTAGTTGCGCGCCGGTGTTCATGGGTCATTAACT  
AACCAAGTGATCATTGCTACCCTTGTATTGGGTTGGTGGTGAATAATCTGGTTCATTACT  
GTGAGTAAATCAAAGTGTTCAAAGCAGGCTTTAATGCTTGTATGGTTCAGCATGGAATAA  
TAATATAAGACTTCGGTTTTGTATCGTTGGCTTTCGAAACCAAAGTAATGATTGAAAGGGA  
TAGTTGGGGGTGCTAGTATTCAGTGGTCAGCGGTGAAATGCGAGGACCCATTGAAGACTA  
ACTTATGCGAAAAGCATTACCAAGGATATCTTCT

>T134a\_02

AGCTCCAATAGCGTATGCTAATACTGTTGCAGTTAAAAGGCTCGTAGTCGAACTTATGAC  
CCGGAGAACCTGGCCTATCGTCTAGTACGTTACGCGCCGGTGTGCACGGGTCATTAACTA  
ACTAAGTGATCGTGGCTACCCTTGTATTGGGTCGGCTCTCGAAATATCTGGTTCATTACT  
GTGAGTAAATCAAAGTGTTCAAAGCAGGCTTTAATGCTTGTATGGTTCAGCATGGAATAA  
CAATATAAGACTTCGGTTTTGTATCGTTGGCTTTCGAAACCAAAGTAATGATTGAAAGGG  
ATAGTTGGGGGTGCTAGTATTCAGTGGTCAGCGGTGAAATGCGAGGACCCATTGAAGACT  
AACTTATGCGAAAAGCATTACCAAGGATATCTTCT

>T134b\_16

AGCTCCAATAGCGTATGCTAATACTGTTGCAGTTAAAAGGCTCGTAGTCGAACTTATGAC  
CTGGAGAACCTGGCCTATCGTCTAGTACGTTACGCGCCGGTGTGCACGGGTCATTAACTA  
ACTAAGTGATCGTGGCTACCCTTGTATTGGGTCGGCCGTGAAATATCTGGTTCATTACT  
GTGAGTAAATCAAAGTGTTCAAAGCAGGCTTTAATGCTTGTATGGTTCAGCATGGAATAA  
CAATATAAGACTTCGGTTTTGTATCGTTGGCTTTCGAAACCAAAGTAATGATTGAAAGGG  
ATAGTTGGGGGTGCTAGTATTCAGTGGTCAGCGGTGAAATGCGAGGACCCATTGAAGACT  
AACTTATGCGAAAAGCATTACCAAGGATATCTTCT

>T135\_04

AGCTCCAATAGCGTATGCTAATACTGTTGCAGTTAAAAGGCTCGTAGTCGAACTTATGAC  
CCTGTGAACCCGGCCCATTCTTCTATGAGATTGCGAACCGGTTGTGCACGGGTCATTCTTCT  
GAAGAGCACTGCTGCCCTTGTGGGTTGGTAGTGTAAATTTAGATCATTACTGTGAGAA

AATCAGAGTGTTCAAAGCAGGCTTTAATTGCTTGTATGGTTCAGCATGGAATAATAAGAT  
AAGACTTCGGTTTTGTTTTGTTGGCTATAGAACCAAAGTAATGATTGAAAGGGATAGTTG  
GGGGTGCTAGTATTCTGTGGTCAGCGGTGAAATGCGAAGACCCACAGAAGACTAACTTAT  
GCGAAAGCATTACCAAGGATATCTTCT  
>T136\_02  
AGCTCCAATAGCGTATGCTAAAGTTGTTGCAGTTAAAAGGCTCGTAGTCGAATATATGAC  
CTCTGTGAACCCCTCCCATCTCTAGTAGATTGCGYGTTCGGTGTGCACGGGTCATCTTTC  
TGAAGAGCACTACTGCCCTTGATTGGGTTGGTAGTGTGATTTGGATCATTACTGTGAGT  
AAATCAAAGTGTTCAAAGCAGGCCTTTGTGCTTGTATGGTTCAGCATGGAATAATAAGAT  
AAGACTTCGGTTTTGTTTTGTTGGCTATAGAACCAAAGTAATGATTGAAAGGGATAGTTG  
GGGGTGCTAGTATTCTGTGGTCAGCGGTGAAATGCGAGGACCCACAGAAGACTAACTTAT  
GCGAAAGCATTACCAAGGATATCTTCT  
>T137\_01  
AGCTCCAATAGCGTATGCTAACGTTGTTGCAGTTTAAAGGCTCGTAGTCGAACATATGAC  
CCTGTGAACCCCTCCCATCTCTAGTAGATTGCGCGGAGGTGTGCACGGGTCATCTTTC  
GAAAACTTTATTGCCCTTGATTGGGATGGTACTGTAATTTGGATCATTACTGTGAGTA  
AATCAAAGTGTTCAAAGCAGGCTTTAATGCTTGTATGGTTCAGCATGGAATAATAAGATA  
AGACTTCGGTTTTGTTTTGTTGGCTATAGAACCAAAGTAATGATTGAAAGGGATAGTTGG  
GGGTGCTAGTATTCTGTGGTCAGCGGTGAAATGCGAGGACCCACAGAAGACTAACTTATG  
CGAAAGCATTACCAAGGATATCTTCT  
>T138\_02  
AGCTCCAATAGCGTATGCTAAAGTTGTTGCAGTTAAAAGGCTCGTAGTCGAACCTTATGAC  
CCTGTGAACCTAGCCCATCTCTAGTAGGTTGCGCGCTGGTGTGCACGGGTCATTTTTCT  
GAAGAGCACTACTGCCCTTGATTGGGTTGGTAATGTGATTTAGATCATTACTGTGAGTA  
AATCAGAGTGTTCAAAGCAGGCTTAAATTGCTTGTATGGTTCAGCATGGAATAATAAGATA  
AGACTTCGGTTTTATTTTTGTTGGCTATAGAACCAAAGTAATGATTGAAAGGGATAGTTGG  
GGGTGCTAGTATTCTAGTGGTCAGCGGTGAAATGCGAGGACCCACTGAAGACTAACTTATG  
CGAAAGCATTACCAAGGATATCTTCT  
>T139\_01  
AGCTCCAATAGCGTATGCTAAAGTTGTTGCAGTTAAAAGGCTCGTAGTCGAACCTTATGAC  
CCTGTGAACCTGGCCCATCTCTAGTAGATTGCGAGCTGGTGTGCACGGGTCATTTTTCT  
GAAGAGCACTGTGCCCCTTGATTGGGTCGGTAGTGTGATTTAGATCATTACTGTGAGAA  
AATCAGAGTGTTCAAAGCAGGCATAATTGCTTGTATGGTTCAGCATGGAATAATAAGATA  
AGACTTCGGTTTTATTTTTGTTGGCTATAGAACCAAAGTAATGATTGAAAGGGATAGTTGG  
GGGTGCTAGTATTCTAGTGGTCAGCGGTGAAATGCGAGGACCCACTGAAGACTAACTTATG  
CGAAAGCATTACCAAGGATATCTTCT  
>T140\_23  
AGCTCCAATAGCGTATGCTAAAGTTGTTGCAGTTAAAAGGCTCGTAGTCGAACCTTATGAC  
CCTGTGAACCCGGCCCATCTCTAGTAGGTTGCGAGCTGGTGTGCACGGGTCATTTTTCT  
GAAGAGCATTGTGCCCTTGATTGGGTTGGTAGTGTGATTTGGATCATTACTGTGAGAA  
AATCAGAGTGTTCAAAGCAGGCTTAAATTGCTTGTATGGTTCAGCATGGAATAATAAGATA  
AGACTTCGGTTTTATTTTTGTTGGCTATAGAACCAAAGTAATGATTGAAAGGGATAGTTGG  
GGGTGCTAGTATTCTAGTGGTCAGCGGTGAAATGCGAGGACCCACTGAAGACTAACTTATG  
CGAAAGCATTACCAAGGATATCTTCT  
>T141\_01  
AGCTCCAATAGCGTATACTAAAGTTGTTGCAGTTAAAAGGCTCGTAGTCGAACCTTATGAC  
CTTGTGAACCTGGCCCAACTTCTCGTAAGTTGCGCGCCGGTGTGCACAGGTCATTCTTCT  
GGAAAGCATTGTGCCCTTCACTGGGTTGGTGTGATTGATCAGATCATTACTGTGAGTA  
AATCAAAGTGTTCAAAGCAGGCTTAAATGCTTGTATGGTTCAGCATGGAATAATAAGATA  
AGACTTCGGTTTTGTTTTGTTGGCTATACGGACCAAAGTAATGATTGAAAGGGATAGTTG  
GGGGTGCTAGTATTAAATGGTCAGCGGTGAAATGCGAGGACCCATTGAAGACTAACTTAT  
GCGAAAGCATTACCAAGGATATCTTCT  
>T142\_04  
AGCTCCAATAGCGTATACTAAAGTTGTTGCAGTTAAAAGGCTCGTAGTCGAACCTATGAC  
CCTGTGAACCTGGCCCAACTCTAGTAGGTTGCGTGCCGGTGTGCACGGGTCATTCTTCT  
GGAGAGCAGGCTGCCCTTGATTGGGTTGGTCATGTGATTGATCAGATCGTTTACTGTGAGTA  
AATCAAAGTGTTCAAAGCAGGCTTAAATGCTTGTATGGTTCAGCATGGAATAATAAGATA  
AGACTTTGGTTTTGTTTTGTTGGCTCGACGAACCAAAGTAATGATTGACAGGGATAGTTG  
GGGGTGCTAGTATTCTAGTGGTCAGCGGTGAAATGCGAGGACCCATTGAAGACTAACTTAT  
GCGAAAGCATTACCAAGGATATCTTCT  
>T143\_02  
AGCTCCAATAGCGTATACTAAAGTTGTTGCAGTTAAAAGGCTCGTAGTCGAACCTTATGAC  
CCTGTGAACCTGGCCCAACTTCTAGTAAGTTGCGTGCCGGTGTGCACGGGTCATTCTTCT  
GGAGAGTGTGATGCACCCTTGATTGGTGTGCGTTACACAATTCAGATCATTACTGTGAG

TAAATCAAAGTGTTCAAAGCAGGCTTTAATGCTTGTATGGTTCAGCATGGAATAATAAGA  
TAAGACTTTGGTTTTGTTTTGTTGGCTATACGAACCAAAGTAATGATTGAAAGGGATAGT  
TGGGGGTGCTAGTATTCCGGTGGTCAGCGGTGAAATGCGAGGACCCATTGAAGACTAACTT  
ATGCCAAAGCATTACCAAGGATATCTTCT

>T144\_01

AGCTCCAATAGCGTATGCTAAAGTTGTTGCAGTTAAAAGGCTCGTAGTCGAATTTATGAC  
CCAGTGAACCTGGTCCAGCTTCTAGTAAATTGCGTGCCGGTGTGCACGGGTCATTCTTCT  
GGAGAGCATGGTTGCCCTTGATTGGGTTGGTCATGTGATTAGATCATTACTGTGAGTA  
AATCAAAGTGTTCAAAGCAGGCTCTAATGCTTGTATGGTTCAGCATGGAATAATAAGATA  
AGACTTCGGTTTTGTTTTGTTGGCTAGACGAACCAAAGTAATGATTGAAAGGGATAGTTG  
GGGGTGTAGTATTAGTGGTCAGCGGTGAAATGCGAGGACCCATTGAAGACTAACTTAT  
GCCAAAGCATTACCAAGGATATCTTCT

>T145\_08

AGCTCCAATAGCGTATRCTAAAGTTGTTGCAGTTAAAAGGCTCGTAGTCGAACCTTATGAC  
CCTGTGAACCTGGCCCAATTTCTAGTAAATTGCGYGCCGGTGTGCACGGGTCATTCTTCT  
GGAGAGCATGGYTGCCCTTGATTGGGTTGGTCATGTGATTAGATCATTACTGTGAGTA  
AATCAAAGTGTTCAAAGCAGGCTCTAATGCTTGTATGGTTCAGCATGGAATAATAAGATA  
AGACTTCGGTTTTGTTTTGTTGGCTAGACGAACCAAAGTAATGATTGAAAGGGATAGTTG  
GGGGTGTAGTATTAGTGGTCAGCGGTGAAATGCGAGGACCCATTGAAGACTAACTTAT  
GCCAAAGCATTACCAAGGATATCTTCT

>T146\_01

AGCTCCAATAGCGTATACTAAAGTTGTTGCAGTTAAAAGGCTCGTAGTCGAACCTTATGAT  
CCTGTGAACCTAGCCCAATGCTAGTACATTGTGTGCTGGTGTGCACGGATCATTCTTCT  
GAAAGCATGGCTGCCCTTGATTGGGTTGGTCGTGTAATTCAGATCATTACTGTGAGTA  
AATCAAAGTGTTCAAAGCAGGCTTCAATGCTTGTATGGTTCAGCATGGAATAATAAGATA  
AGACTTCGGTTTTGTTTTGTTGGCTATAACGAACCAAAGTAATGATTGACAGGGATAGTT  
GGGGTGTAGTATTAGTGGTCAGCGGTGAAATGCGAGGACCCATTGAAGACTAACTTAT  
TGCGAAAGCATTACCAAGGATATCTTCT

>T147\_01

AGCTCCAATAGCGTATACTAACGTTGTTGCAGTTAAAAGGCTCGTAGTCGAATTTATGAT  
CCTGTGAACCTGGCCCAACTTCTAGTAAAGTTGCGAGCTGGTGTGCACGGATCATTGT  
CTGAAGCGTATAGTTATCCTTGATTGGATTAATCATTACAAATTCAGATCATTACTGTG  
AGTAAATCAAAGTGCTCAAAGCAGGCTTCAATGCTTGTATGGTTCAGCATGGAATAATA  
GATAAGACTTGGGTTTTGTTTTGTTGGCTGGAACGAACCAAAGTAATGATTGAAAGGG  
AGTTGGGGTGTAGTATTCAATGGTCAGCGGTGAAATGCGAAGACCCATTGAAGACTAA  
CTTATGCGAAAGCATTACCAAGGATATCTTCT

>T148\_07

AGCTCCAATAGCGTATACTAACGTTGTTGCAGTTAAAAGGCTCGTAGTCGAACCTTATGAT  
CCTGTGAACCTGGCCCAATTTCTAGTAAATTGCGAGCCGGTGTGCACGGATCATTCTTCT  
GAAGACTCATGTCTGCTCTTGATTGAGCTTGGGCATTGTAGAATTCAGATCCTTTACTGT  
GAGTAAATCAAAGTGCTCAAAGCAGGCTTCAATGCTTGTATGGTTCAGCATGGAATAATA  
AGATAAGACTTGGGTTTTGTTTTGTTGGCTATAGACGAACCAAAGTAATGATTGAAAGGG  
ATAGTTGGGGTGTAGTATTCAATGGTCAGCGGTGAAATGCGAAGACCCATTGAAGACT  
AACTTATGCGAAAGCATTACCAAGGATATCTTCT

>T149\_05

AGCTCCAATAGCGTATACTAACGTTGTTGCAGTTAAAAGGCTCGTAGTCGAACCTTATGAT  
CCTGTGAACCTGGCCCAACTTCTAGTAAAGTTGCGCGCCGGTGTGCACGGATCATTCTTCT  
GAAGAGCAGTGTGCACTTGATTGTGTTGGTACTGGGATTAGATCATTACTGTGAGTA  
AATCAAAGTGCTCAAAGCAGGCTTCAATGCTTGTATGGTTCAGCATGGAATAATAAGATA  
AGACTTCGGTTTTGTTTTGTTGGCTAGACGAACCAAAGTAATGATTGAAAGGGATAGTTG  
GGGGTGTAGTATTCAATGGTCAGCGGTGAAATGCGGAGACCCATTGAAGACTAACTTAT  
GCCAAAGCATTACCAAGGATATCTTCT

>T150\_19

AGCTCCAATAGCGTATACTAACGTTGTTGCAGTTAAAAGGCTCGTAGTCGAACCTTATGAT  
CCTGTGAACCTGGCCCAATTTCTAGTAAATTGCGCGCCGGTGTGCACGGATCATTCTTCT  
GAAAAGCAGCGCTGCCCTTCACTGGGTTGGTGTGTAATTCAGATCATTACTGTGAGTA  
AATCAAAGTGCTCAAAGCAGGCTTCAATGCTTGTATGGTTCAGCATGGAATAATAAGATA  
AGACTTCGGTTTTGTTTTGTTGGCTATACGAACCAAAGTAATGATTGAAAGGGATAGTTG  
GGGGTGTAGTATTAGTGGTCAGCGGTGAAATGCGAAGACCCATTGAAGACTAACTTAT  
GCCAAAGCATTACCAAGGATATCTTCT

>T151\_01

AGCTCCAATAGCGTATGCTAAAGTTGTTGCAGTTAAAAGGCTCGTAGTCGAACCTTATGAC  
CCTGTGAACCTGGTCCAATGCTAGTACATTGTGAACCGGTTGTGCACGGGTCATTCTTCT  
GAAGAGGCTGGCTACCCTTGATTGGGTCGGCCATGTCCGATTCAGATCATTACTGTGAG

AAAATCAAAGTGTTCAAAGCAGGCTTTAATGCTTGAATGGTTCAGCATGGAATAATAAGA  
TAAGACTTGGGTTTTGTTTTGTTGGCTATAGACGAACCAAAGTAATGATTGAAAGGGATA  
GTTGGGGTGCTAGTATTTAGTGGTCAGCGGTGAAATGCGAGGACCCACTAAAGACTAAC  
TTATGCGAAAGCATTACCAAGGATATCTTCT

>T152\_01

AGCTCCAATAGCGTATGCTAAAGTTGTTGCAGTTAAAAGGCTCGTAGTCGAATTTATGAC  
CCAGTGAACCTAGTCCAGCCTCTAGTAGGCTGTGAGCTGGTGTGCACGGGTCATTCTTCT  
GAAGAGCATGGCTACCCTTGATTGGTGTGTGCATGTAATTCAGATCATTTACTGTGAGAA  
AATCAAAGTGTTCAAAGCAGGCTTTAATGCTTGAATGGTTCAGCATGGAATAATAAGATA  
AGACTTCGGTTTTGTTTTGTTGGCTAGACGAACCAAAGTAATGATTGAAAGGGATAGTTG  
GGGGTGTAGTATTTAATGGTTCAGCGGTGAAATGCGAGGACCCATTAAAGACTAACTTAT  
GCGAAAGCATTACCAAGGATATCTTCT

>T153\_18

AGCTCCAATAGCGTATGCTAAAGTTGTTGCAGTTAAAAGGCTCGTAGTCGAATTTATGAC  
CCAGTGAACCTGGTCCAGCCTCTAGTAGGCTGTGAACCGGTGTGCACGGGTCATTCTTCT  
GGAGAGCATGGTTGCCCTTGATTGGTGGTGCATGTAATTCAGATCATTTACTGTGAGAA  
AATCAAAGTGTTCAAAGCAGGCTTTAATGCTTGAATGGTTCAGCATGGAATAATAAGATA  
AGACTTCGGTTTTGTTTTGTTGGCTAGACGAACCAAAGTAATGATTGAAAGGGATAGTTG  
GGGGTGTAGTATTTAATGGTTCAGCGGTGAAATGCGAGGACCCATTAAAGACTAACTTAT  
GCGAAAGCATTACCAAGGATATCTTCT

>T154a\_01

AGCTCCAATAGCGTATGCTAAAGTTGTTGCAGTTAAAAGGCTCGTAGTCGAATTTATGAC  
CCTGTGAACCCGGTCCAACCTCTAGTGGGTTGCGAAGTGGTGTGCACGGGTCATTCTTCT  
GAAGAGCCTCTGTCCCTTGATTGTGATGGTTGTGTGATTCAGATCATTTACTGTGAGAA  
AATCAAAGTGTTCAAAGCAGGCTTTAATGCTTGAATGGTTCAGCATGGAATAATAAGATA  
AGACTTCGGTTTTGTTTTGTTGGCTAGACGAACCAAAGTAATGATTGAAAGGGATAGTTG  
GGGGTGTAGTATTTAATGGTTCAGCGGTGAAATGCGAGGACCCATTAAAGACTAACTTAT  
GCGAAAGCATTACCAAGGATATCTTCT

>T154b\_01

AGCTCCAATAGCGTATGCTAAAGTTGTTGCAGTTAAAAGGCTCGTAGTCGAATTTATGAC  
CCTGTGAACCCAGTCTAGCCTCTAGTGGGCTACGAAGTGGTGTGCACGGGTCATTCTTCT  
GAAGAGCACTTCTGTCTTGATTGTGATGGTTGTGTGATTCAGATCATTTACTGTGAGAA  
AATCAAAGTGTTCAAAGCAGGCTTTAATGCTTGAATGGTTCAGCATGGAATAATAAGATA  
AGACTTCGGTTTTGTTTTGTTGGCTAGACGAACCAAAGTAATGATTGAAAGGGATAGTTG  
GGGGTGTAGTATTTAATGGTTCAGCGGTGAAATGCGAGGACCCATTAAAGACTAACTTAT  
GCGAAAGCATTACCAAGGATATCTTCT

>T155a\_09

AGCTCCAATAGCGTATGCTAAAGTTGTTGCAGTTAAAAGGCTCGTAGTCGAATTTATGAT  
CCTGTGAACCTGGTCCAACCTCTAGTAAGTTGTGAACCGGTGTGCACGGATCATTTTTTC  
TGAAAGCATCTCTGTCTTGATTGGATTGGATTTGTAATTCAGATCGTTTACTGTGAGA  
AAATCAGAGTGTTCAAAGCAAGCTTTAATGCTTGAATGGTTCAGCATGGAATAATAAGAT  
AAGACTTCGGTTTTGTTTTGTTGGCTAGACGAACCAAAGTAATGATTGAAAGGGATAGTT  
GGGGTGTAGTATTTAATGGTTCAGCGGTGAAATGCGAGGACCCATTGAAGACTAACTTA  
TGCGAAAGCATTACCAAGGATATCTTCT

>T155b\_04

AGCTCCAATAGCGTATGCTAAAGTTGTTGCAGTTAAAAGGCTCGTAGTCGAATTTATGAT  
CCTGTGAACCTGGTCCAACCTCTAGTAAGTTGTGAACCGGTGTGCACGGATCATTTTTTC  
GGAAAGCATTTTCTGTCTTCACTGGATTGGTTTTGTAATTCAGATCGTTTACTGTGAGA  
AAATCAGAGTGTTCAAAGCAAGCTTTAATGCTTGAATGGTTCAGCATGGAATAATAAGAT  
AAGACTTCGGTTTTGTTTTGTTGGCTAGACGAACCAAAGTAATGATTGAAAGGGATAGTT  
GGGGTGTAGTATTTAATGGTTCAGCGGTGAAATGCGAGGACCCATTGAAGACTAACTTA  
TGCGAAAGCATTACCAAGGATATCTTCT

>T156\_01

AGCTCCAATAGCGTATGCTAAAGTTGTTGCAGTTAAAAGGCTCGTAGTCGAATTTCTGAC  
CCTGTGAACCTGGTCCAACCTCTAGTAGGTTGTGAATCGGTGTGCACGGGTCATTTTTCT  
GGAAAACATGATTGCTCTTGATTGGTGTGATGATGGGATTCAGATCATTTACTGTGAGAA  
AATCAAAGTGTTCAAAGCAGGCTTTAATGCTTGAATGGTTCAGCATGGAATAATAAGATA  
AGACTTTGGTTTTGTTTTGTTGGCTAGACGAACCAAAGTAATGATTGAAAGGGATAGTTG  
GGGGTGTAGTATTTAATGGTTCAGCGGTGAAATGCGAGGACCCATTAAAGACTAACTTAT  
GCGAAAGCATTACCAAGGATATCTTCT

>T157\_02

AGCTCCAATAGCGTATGCTAAAGTTGTTGCAGTTAAAAGGCTCGTAGTCGAATTTATGAC  
CCTGTGAACCTGGTCCAACCTCTAGTAGGTTGTGAACCGGTGTGCACGGGTCATTTTTCT  
GGAAAGCATGGCTGCCCTTCACTGGTGTGTTATGTAATTCAGATCGTTTACTGTGAGAA

AATCAAAGTGTTCAAAGCAGGCTTTAATGCTTGAATGGTTCAGCATGGAATAATAAGATA  
AGACTTCGGTTTTGTTTTGTTGGCTAGACGAACCAAAGTAATGATTGAAAGGGATAGTTG  
GGGGTGTAGTATTTAATGGTCAGCGGTGAAATGCGAGGACCCATTAAAGACTAACTTAT  
GCGAAAGCATTACCAAGGATATCTTCT

>T158\_06

AGCTCCAATAGCGTATGCTAAAGTTGTTGCAGTTAAAAGGCTCGTAGTCGAATTTATGAC  
CCTGTGAACCCGGTCCAACCTCTAGTAGGTTGTGAACGGTGTGCACGGGTCATTCTTCT  
GAAAAGCAGCTCTGCCCTTGATTGGTGTGGTGTGTAATTCAGATCGTTTTACTGTGAGAA  
AATCAAAGTGTTCAAAGCAGGCTTTAATGCTTGAATGGTTCAGCATGGAATAATAAGATA  
AGACTTCGGTTTTGTTTTGTTGGCTCAAACGAACCAAAGTAATGATTGAAAGGGATAGTT  
GGGGTGTAGTATTTAATGGTCAGCGGTGAAATGCGAGGACCCATTAAAGACTAACTTA  
TGCGAAAGCATTACCAAGGATATCTTCT

>T159\_02

AGCTCCAATAGCGTATGCTAAAGTTGTTGCAGTTAAAAGGCTCGTAGTCGAATTTATGAC  
CCAGTGAACCTGGTCCAACCTCTAGTAGGTTGTGAACCGGTGTGCACGGGTCATTTTTCT  
GGAGAGCACTTCTGCCCTTGATTGGCGTGGTGTGATTTCAGATCGTTTTACTGTGAGAA  
AATCAAAGTGTTCAAAGCAGGCTTTAATGCTTGAATGGTTCAGCATGGAATAATAAGATA  
AGACTTCGGTTTTGTTTTGTTGGCTAGACGAACCAAAGTAATGATTGAAAGGGATAGTTG  
GGGGTGTAGTATTTAATGGTCAGCGGTGAAATGCGAGGACCCATTAAAGACTAACTTAT  
GCGAAAGCATTACCAAGGATATCTTCT

>T160\_04

AGCTCCAATAGCGTATGCTAAAGTTGTTGCAGTTAAAAGGCTCGTAGTCGAATTTATGAC  
CCAGTGAACCTGGTCCAGCCTCTAGTAGGCTGTGAGCCGGTGTGCACGGGTCATTCTTCT  
GGAGAGCAGCTCTGCCCTTCACTGGTGTGGTGTGATTTCAGATCGTTTTACTGTGAGAA  
AATCAAAGTGTTCAAAGCAGGCTTTAATGCTTGAATGGTTCAGCATGGAATAATAAGATA  
AGACTTCGGTTTTGTTTTGTTGGCTAGACGAACCAAAGTAATGATTGAAAGGGATAGTTG  
GGGGTGTAGTATTTAATGGTCAGCGGTGAAATGCGAGGACCCATTAAAGACTAACTTAT  
GCGAAAGCATTACCAAGGATATCTTCT

>T161\_06

AGCTCCAATAGCGTATGCTAAAGTTGTTGCAGTTAAAAGGCTCGTAGTCGAATTTATGAC  
CCAGTGAACCTGGCCCAGCCTCTAGTAGGTTGTGAGCTGGTGTGCACGGGTCATTTTTCT  
GGAGAGCAGCGTTGCCCTTGATTGGTGTGATCGTGTGATTTCAGATCGTTTTACTGTGAGAA  
AATCAAAGTGTTCAAAGCAGGCTTTAATGCTTGAATGGTTCAGCATGGAATAATAAGATA  
AGACTTCGGTTTTGTTTTGTTGGCTAGACGAACCAAAGTAATGATTGAAAGGGATAGTTG  
GGGGTGTAGTATTTAATGGTCAGCGGTGAAATGCGAGGACCCATTAAAGACTAACTTAT  
GCGAAAGCATTACCAAGGATATCTTCT

>T162\_04

AGCTCCAATAGCGTATGCTAAAGTTGTTGCAGTTAAAAGGCTCGTAGTCGAACTTATGGC  
CCTGTGAACCTGGCCCAATCTCTAGTAGATTGCGTGCCGGTGTGCACGGGYCATTTTTCT  
GGAAAGCATTGCTGCCCTTGATTGGGTTGGTCTGTAATTCAGATCATTTACTGTGAGAA  
AATCAAAGTGTTCAAAGCAGGCTTTAATGCTTGTATGGTTCAGCATGGAATAATAAGATA  
AGACTTCGGTTTTGTTTTGTTGGCTACACGAACCAAAGTAATGATTGAAAGGGATAGTTG  
GGGGTGTAGTATTCAATGGTCAGCGGTGAAATGCGAGGACCCATTGAAGACTAACTTAT  
GCGAAAGCATTACCAAGGATATCTTCT

>T163\_03

AGCTCCAATAGCGTATGCTAAAGTTGTTGCAGTTAAAAGGCTCGTAGTCGAACTTATGGC  
CCTGTGAACCTGGCCCAATCTCTAGTAGATTGCGTGCCGGTGTGCACGGGTCATTCTTCT  
GAAAAGCATTGCTGCCCTTGATTGGGTTGGTGTGTAATTCAGATCATTTACTGTGAGAA  
AATCAGAGTGCTCAAAGCAGGCTTCAATGCTTGTATGGTTCAGCATGGAATAATAACATA  
AGACTTCGGTTTTGTTTTGTTGGCTATACGAACCAAAGTAATGATTGAAAGGGATAGTTG  
GGGGTGTAGTATTTCAGTGGTTCAGCGGTGAAATGCGAGGACCCATTGAAGACTAACTTAT  
GCGAAAGCATTACCAAGGATATCTTCT

>T164a\_01

AGCTCCAATAGCGTATGCTAAAGTTGTTGCAGTTAAAAGGCTCGTAGTCGAACTTATGGC  
CCTGTGAACCTGGCCCAATCTCTAGTAGATTGCGAGCCGGTGTGCACGGGTCATTCTTCT  
GGAAAGCATTGCTGCCCTTGATTGGGTTGGTGTGTAATTCAGATCATTTACTGTGAGAA  
AATCAAAGTGTTCAAAGCAGGCTTTAATGCTTGTATGGTTCAGCATGGAATAATAAGATA  
AGACTTCGGTTTTGTTTTGTTGGCTATACGAACCAAAGTAATGATTGAAAGGGATAGTTG  
GGGGTGTAGTATTTCAGTGGTTCAGCGGTGAAATGCGAGGACCCATTGAAGACTAACTTAT  
GCGAAAGCATTACCAAGGATATCTTCT

>T164b\_06

AGCTCCAATAGCGTATGCTAAAGTTGTTGCAGTTAAAAGGCTCGTAGTCGAACTTATGGC  
CCTGTGAACCTGGCCCAATCTCTAGTAGATTGCGAGCCGGTGTGCACGGGTCATTCTTCT  
GGAGAGCATTGCTGCCCTTGATTGGGTTGGTGTGATTTCAGATCATTTACTGTGAGAA



AATCAAAGTGTTCAAAGCAGGCTTTAATGCTTGTATGGTTCAGCATGGAATAATAAGATA  
AGACTTCGGTTTTGTTTTGTTGGCTATACGAACCAAAGTAATGATTGAAAGGGATAGTTG  
GGGGTGTAGTATTCAAGTGGTCAGCGGTGAAATGCGAGGACCCATTGAAGACTAACTTAT  
GCGAAAGCATTACCAAGGATATCTTCT

>T165\_01

AGCTCCAATAGCGTATGCTAAAGTTGTTGCAGTTAAAAGGCTCGTAGTCGAACTTATGGC  
CCTGTGAACCTGGCCCAATCTCTAGTAGATTGCGAGCCGGTGTGCGCGGGCCATTCTTCT  
GGAGAGCATTGCTGCCCTTGATTGGGTGGGTGATGGGATTAGATCATTACTGTGAGAA  
AATCAAAGTGTTCAAAGCAGGCTTCAATGCTTGTATGGTTCAGCATGGAATAATAAGATA  
AGACTTCGGTTTTGTTTTGTTGGCTATACGAACCAAAGTAATGATTGAAAGGGATAGTTG  
GGGGTGTAGTATTCAATGGTCAGCGGTGAAATGCGAGGACCCATTGAAGACTAACTTAT  
GCGAAAGCATTACCAAGGATATCTTCT

>T166\_01

AGCTCCAATAGCGTATGCTAAAGTTGTTGCAGTTAAAAGGCTCGTAGTCGAACTTTTGAC  
CCTGTGAACCTAGCCCAATCTCTAGTAGATTGCGAGCTGGTGTGCACGGGTCACTTCTTCT  
GAAAAGCATTGCTGCCCTTGATTGGGTGCGTGATGTAATTCAGATCATTACTGTGAGAA  
AATCAAAGTGTTCAAAGCAGGCTTTAATGCTTGAATGGTTCAGCATGGAATAATAAGATA  
AGACTTCGGTTTTGTTTTGTTGGCTAAACGAACCAAAGTAATGATTGAGAGGGATAGTTG  
GGGGTGTAGTATTCAAGTGGTCAGCGGTGAAATGCGAGGACCCATTGAAGACTAACTTAT  
GCGAAAGCATTACCAAGGATATCTTCT

>T167\_01

AGCTCCAATAGCGTATGCTAAAGTTGTTGCAGTTAAAAGGCTCGTAGTCGAACTTATGAT  
CCAGTGAACCTGGCCCAATCTTCTGTTGGATTGAGCGCCGGTGTGCACGGGTCACTTTTCT  
TGAAAGCCTCGCTGCCCTTGATTGGGTGGGCGATGTAATTCAGATCATTACTGTGAGAA  
AAATCAGAGTGTTCAAAGCAGGCTTTAATGCTTGAATGGTTCAGCATGGAATAATAAGAT  
AAGACTTCGGTTTTGTTTTGTTGGCTAAACGAACCAAAGTAATGATTGAAAGGGATAGTT  
GGGGTGTAGTATTTAATGGTCAGCGGTGAAATGCGAGGACCCATTGAAGACTAACTTAT  
TGCGAAAGCATTACCAAGGATATCTTCT

>T168\_01

AGCTCCAATAGCGTATGCTAAAGTTGTTGCAGTTAAAAGGCTCGTAGTCGAACTTATGAC  
TCTGTGAACCTGGCCCAATCTTCTGTTGGTGTGCGAGCCGGTGTGCACGAGTCATTGTTCT  
GGAAAGCATTCTGCCCTTGATTGGGTGGTCAATGTAATTCAGATCATTACTGTGAGAA  
AATCAAAGTGTTCAAAGCAGGCTTCAATGCTTGAATGGTTCAGCATGGAATAATAAGATA  
AGACTTCGGTTTTGTTTGGCTATACGAACCAAAGTAATGATTGAAAGGGATAGTTG  
GGGGTGTAGTATTAATAGGTCAGCGGTGAAATGCGAGGACCCATTGAAGACTAACTTAT  
GCGAAAGCATTACCAAGGATATCTTCT

>T169\_02

AGCTCCAATAGCGTATGCTAAAGTTGTTGCAGTTAAAAGGCTCGTAGTCGAACTTATGAC  
CCAGTGAACCTGGCCCAATCTCTAGTAGGTTGCGAGCCGGTGTGCACGGGTCACTTTTCT  
GGAGAGCATTGCTGCCCTTGATTGGGTGGGTGATGTGATTAGATCATTACTGTGAGAA  
AATCAAAGTGTTCAAAGCAGGCTTTAATGCTTGTATGGTTCAGCATGGAATAATAAGATA  
AGACTTCGGTTTTGTTTTGTTGGCTAAACGAACCAAAGTAATGATTGAAAGGGATAGTTG  
GGGGTGTAGTATTGCGGTGGTCAGCGGTGAAATGCGAGGACCCATTGAAGACTAACTTAT  
GCGAAAGCATTACCAAGGATATCTTCT

>T170\_02

AGCTCCAATAGCGTATGCTAAAGTTGTTGCAGTTAAAAGGCTCGTAGTCGAACTTATGAC  
TCTGTGAACCTGGCCCAATCTCTAGTAGGTTGCGAGCCGGTGTGCACGGGTCACTTTTCT  
GGAGAGCATTGCTGCCCTTGATTGGGTGGGTGATGTGATTAGATCCTTTACTGTGAGAA  
AATCAAAGTGTTCAAAGCAGGCTTTAATGCTTGTATGGTTCAGCATGGAATAATAAGATA  
AGACTTCGGTTTTGTTTTGTTGGCTATACGAACCAAAGTAATGATTGAAAGGGATAGTTG  
GGGGTGTAGTATTCAAGTGGTCAGCGGTGAAATGCGGGGACCCATTGAAGACTAACTTAT  
GCGAAAGCATTACCAAGGATATCTTCT

>T171\_01

AGCTCCAATAGCGTATGCTAAAGTTGTTGCAGTTAAAAGGCTCGTAGTCGAACTTATGAC  
CCTGTGAACCTGGCCCAATCTCTAGTAGATTGCGAGCCGGTGTGCACGGGTCACTTTTCT  
GGAGAGCATTGCTGCCCTTGATTGGGTGGGTGATGGGATTAGATCGTTTACTGTGAGAA  
AATCAAAGTGTTCAAAGCAGGCTTTAATGCTTGTATGGTTCAGCATGGAATAATAAGATA  
AGACTTCGGTTTTGTTTTGTTGGCTAGACGAACCAAAGTAATGATTGAAAGGGATAGTTG  
GGGGTGTAGTATTCAAGTGGTCAGCGGTGAAATGCGGGGACCCATTGAAGACTAACTTAT  
GCGAAAGCATTACCAAGGATATCTTCT

>T172\_02

AGCTCCAATAGCGTATGCTAAAGTTGTTGCAGTTAAAAGGCTCGTAGTCGAACTTTTGAC  
CCTGTGAACCTGGCCCAATCTCTAGTAGATTGCGAGCCGGTGTGCACGGGTCACTCATCT  
GGAGAGCATCGTCCCCTTGATTGGGCGAGTGATGGGATTAGATCCTTTACTGTGAGAA

AATCAAAGTGTTCAAAGCAGGCTTTAACGCTTGAATGGTTCAGCATGGAATAATAAGATA  
AGACTTCGGTTTTGTTTTGTTGGCTTGACGAACCAAAGTAATGATTGAGAGGGATAGTTG  
GGGGTGTAGTATTCCGGTGGTCAGCGGTGAAATGCGAGGACCCATTGAAGACTAACTTAT  
GCGAAAGCATTACCAAGGATATCTTCT  
>T173\_01  
AGCTCCAATAGCGTATGCTAAAGTTGTTGCAGTTAAAAGGCTCGTAGTCGAACTTTTGAC  
CTTGCGAACCTGGCCCCGACCTCTAGTAGGTCGCGAGCCGGTGTGCGCGGGTCATTCTTCT  
GGAGAGCGGTGCTGCCCTTGATTGGGTGGGCGCCGGGATCCAGATCCTTTACTGTGAGAA  
AATCAAAGTGTTCAAAGCAGGCTTTAACGCTTGTATGGTTCAGCATGGAATAATAAGATA  
AGACTTGGTTTTGTCTTGTGGCTCGACGAACCAAAGTAATGATTGAGAGGGATAGTTG  
GGGGTGTAGTATTCCAGTGGTCAGCGGTGAAATGCGAGGACCCATTGAAGACTAACTTAT  
GCGAAAGCATTACCAAGGATATCTTCT  
>T174\_01  
AGCTCCAATAGCGTATGCTAAAGTTGTTGCAGTTAAAAGGCTCGTAGTCGAAATTTATGAC  
TCTGTGAACCTGGCCCAATCTCTAGTGGATTGCGAGCCGGAGTGCACGGGTCAATTTTTCT  
GGAGAGCATTGCTGCCCTTGATTGGGTTTGGTGAATGTGATTGAGATCGTTTACTGTGAG  
AAAATCAAAGTGTTCAAAGCAGGCTTTAATGCTTGTATGGTTCAGCATGGAATAATAAGA  
TAAGACTTGGTTTTGTTTTGTTGGCTCGACGAACCAAAGTAATGATTGAAAGGGATAGT  
TGGGGTGTAGTATTCCAGTGGTCAGCGGTGAAATGCGAGGACCCATTGAAGACTAACTT  
ATGCGAAAGCATTACCAAGGATATCTTCT  
>T175\_03  
AGCTCCAATAGCGTATGCTAAAGTTGTTGCAGTTAAAAGGCTCGTAGTCGAACTTTATGAC  
TCTGTGAACCTGGCCCAATCTCTAGTGGATTGCGAGCCGGTGTGACGGGTCAATCTTCT  
GGAGAGCATTGCTGCCCTTGATTGGGTTGGTAATGTGATTGAGATCATTACTGTGAGAA  
AATCAAAGTGTTCAAAGCAGGCTTTAATGCTTGTATGGTTCAGCATGGAATAATAAGATA  
AGACTTCGGTTTTGTTTTGTTGGCTCAACGAACCAAAGTAATGATTGAAAGGGATAGTTG  
GGGGTGTAGTATTCCAGTGGTCAGCGGTGAAATGCGAGGACCCATTGAAGACTAACTTAT  
GCGAAAGCATTACCAAGGATATCTTCT  
>T176\_02  
AGCTCCAATAGCGTATGCTAAAGTTGTTGCAGTTAAAAGGCTCGTAGTCGAAATTTATGAC  
CCAGTGAACCTGGCCCAATCTCTAGTGGATTGCGAGCCGGTGTGACGGGTCAATCTTCT  
GGAGAGCAATGCTGCCCTTGATTGGGTTGGTACTGTGATTGAGATCATTACTGTGAGAA  
AATCAAAGTGTTCAAAGCAGGCTTTAATGCTTGTATGGTTCAGCATGGAATAATAAGATA  
AGACTTCGGTTTTGTTTTGTTGGCTAGACGAACCAAAGTAATGATTGAAAGGGATAGTTG  
GGGGTGTAGTATTAAATGGTTCAGCGGTGAAATGCGAGGACCCATTGAAGACTAACTTAT  
GCGAAAGCATTACCAAGGATATCTTCT  
>T177\_02  
AGCTCCAATAGCGTATGCTAAAGTTGTTGCAGTTAAAAGGCTCGTAGTCGAACTTTATGCC  
CCAGAGAACCCTGGCCCAATCTCTAGTGGATTGCGAGCTGGTGTGCTCGGGACATTCTTCT  
GGAGAGCGTGACTACCCTTGATTGGGTCGGTTACGTGATTGAGATCATTACTGTGAGAA  
AATCAAAGTGTTCAAAGCAGGCTTTAATGCTTGTATGGTTCAGCATGGAATAATAAGATA  
AGACTTCGGTTTTGTTTTGTTGGCTAGACGAACCAAAGTAATGATTGAAAGGGATAGTTG  
GGGGTGTAGTATTAAATGGTTCAGCGGTGAAATGCGAGGACCCATTGAAGACTAACTTAT  
GCGAAAGCATTACCAAGGATATCTTCT  
>T178\_03  
AGCTCCAATAGCGTATGCTAAAGTTGTTGCAGTTAAAAGGCTCGTAGTCGAACTTTATGAT  
TCAGTGAACCTGGCCCAATCCCTAGTGGATTGCGAGCCGGTGTGACGGGTCAATCTTCT  
GGAGAGCTCTGCTACCCTTGATTGGGTCGGTAGTGTGATTGAGATCATTACTGTGAGAA  
AATCAAAGTGTTCAAAGCAGGCTTTAATGCTTGTATGGTTCAGCATGGAATAATAAGATA  
AGACTTCGGTTTTGTTTTGTTGGCTAGACGAACCAAAGTAATGATTGAAAGGGATAGTTG  
GGGGTGTAGTATTCAATGGTTCAGCGGTGAAATGCGAGGACCCATTGAAGACTAACTTAT  
GCGAAAGCATTACCAAGGATATCTTCT
