# Supplementary material
Source: PubMed Central journal article supplement (PMC3834849)
Supplement: ismej2013116x5.pdf [file ismej2013116x5.pdf]

## Vampires in the oceans: predatory cercozoan amoebae in marine habitats.

Cédric Berney, Sarah Romac, Frédéric Mahé, Sébastien Santini, Raffaele Siano, and David Bass

**Supplementary Table S2. List of the 62 Vampyrellid SSU rDNA environmental clones identified in the GenBank database.**

| accession number | clone name         | phylogenetic position   | habitat (MA = marine; FW = freshwater)                    | reference                  | remarks                                |
|------------------|--------------------|-------------------------|-----------------------------------------------------------|----------------------------|----------------------------------------|
| JN090874         | KRL01E14           | Clade A, Vampyrellidae  | FW – surface water from a reconstructed lake, Greece      | Oikonomou et al. 2012      | see Fig. 4 & 5                         |
| EU567262         | DB-2703-5          | Clade A, Vampyrellidae  | FW – shallow anaerobic sediment, UK                       | Bass et al. 2009           | see Fig. 4 & 5                         |
| DQ409093         | VN3                | Clade A, Vampyrellidae  | FW – hyper-eutrophic lake picoplankton, France            | Lepère et al. 2007         | > 98% identical to EU567262            |
| EU567266         | lb10               | Clade A, Vampyrellidae  | FW – stream sediment, UK                                  | Bass et al. 2009           | > 98% identical to <i>V. lateritia</i> |
| EU567265         | ihs12              | Clade A, incertae sedis | FW – stream sediment, Panama                              | Bass et al. 2009           | see Fig. 4 & 5                         |
| EF024716         | Elev_18S_1206      | Clade A, incertae sedis | FW – trembling aspen rhizosphere, USA                     | Lesaulnier et al. 2008     | see Fig. 4 & 5                         |
| AY620291         | 10-3.2             | Clade A, incertae sedis | FW – associated with submerged pond lily stems, UK        | Bass & Cavalier-Smith 2004 | see Fig. 4                             |
| EU567264         | 8-2.4              | Clade A, incertae sedis | FW – associated with submerged pond lily stems, UK        | Bass et al. 2009           | > 98% identical to AY620291            |
| AY620292         | 4-1.6              | Clade A, Leptophryidae  | FW – associated with <i>Sphagnum</i> around a pond, UK    | Bass & Cavalier-Smith 2004 | see Fig. 4                             |
| AY620306         | 13-1.5             | Clade A, Leptophryidae  | FW – woodland stream sediment, Canada                     | Bass & Cavalier-Smith 2004 | see Fig. 4                             |
| EU567257         | 9-6.3              | Clade A, Leptophryidae  | FW – woodland soil, Canada                                | Bass et al. 2009           | < 1000 bp / not including V4           |
| EU567258         | fp12               | Clade A, Leptophryidae  | FW – stream sediment, New Zealand                         | Bass et al. 2009           | see Fig. 4 & 5                         |
| EU567259         | DB-2703-14         | Clade A, Leptophryidae  | FW – shallow anaerobic sediment, UK                       | Bass et al. 2009           | see Fig. 4 & 5                         |
| EU567260         | DB-2703-7          | Clade A, Leptophryidae  | FW – shallow anaerobic sediment, UK                       | Bass et al. 2009           | see Fig. 4 & 5                         |
| EU567261         | DB-2703-28         | Clade A, Leptophryidae  | FW – shallow anaerobic sediment, UK                       | Bass et al. 2009           | see Fig. 4 & 5                         |
| EU567263         | se11               | Clade A, Leptophryidae  | FW – stream sediment, New Zealand                         | Bass et al. 2009           | see Fig. 4 & 5                         |
| AY642743         | A51                | Clade A, Leptophryidae  | FW – lake picoplankton, France                            | Lefranc et al. 2005        | > 98% identical to EU567261            |
| DQ409086         | VO3                | Clade A, Leptophryidae  | FW – hyper-eutrophic lake picoplankton, France            | Lepère et al. 2007         | see Fig. 4 & 5                         |
| DQ409121         | VP16               | Clade A, Leptophryidae  | FW – hyper-eutrophic lake picoplankton, France            | Lepère et al. 2007         | < 1000 bp / not including V4           |
| FJ410735         | EBA1.1             | Clade A, Leptophryidae  | FW – shallow lake, China                                  | Chen – unpubl.             | > 98% identical to EU567261            |
| FJ410786         | EBA124.49          | Clade A, Leptophryidae  | FW – shallow lake, China                                  | Chen – unpubl.             | < 1000 bp / not including V4           |
| GQ844430         | WD0-49             | Clade A, Leptophryidae  | FW – lake plankton during <i>Microcystis</i> bloom, China | Chen et al. 2010           | < 1000 bp / not including V4           |
| GQ844515         | WD4-84             | Clade A, Leptophryidae  | FW – lake plankton during <i>Microcystis</i> bloom, China | Chen et al. 2010           | < 1000 bp / not including V4           |
| GQ844533         | WD4-104            | Clade A, Leptophryidae  | FW – lake plankton during <i>Microcystis</i> bloom, China | Chen et al. 2010           | < 1000 bp / not including V4           |
| AB572110         | ABC2_C12           | Clade A, Leptophryidae  | FW – clay wall material, Japan                            | Kitajima et al. 2010       | > 98% identical to EU567259            |
| AB572111         | ABC2_D02           | Clade A, Leptophryidae  | FW – clay wall material, Japan                            | Kitajima et al. 2010       | > 98% identical to EU567259            |
| AB572112         | ABC1_G06           | Clade A, Leptophryidae  | FW – clay wall material, Japan                            | Kitajima et al. 2010       | > 98% identical to EU567259            |
| DQ512535         | LVNP2-BH107-10-36F | Clade A, Leptophryidae  | FW – acidic, hydrothermal sediment, USA                   | Brown & Wolfe 2006         | < 1000 bp / not including V4           |
| GU297635         | AS.E24#            | Clade A, Leptophryidae  | FW – glacial cryoconite hole ecosystem, Antarctica        | Cameron et al. – unpubl.   | < 1000 bp / not including V4           |

| accession number | clone name        | phylogenetic position | habitat (MA = marine; FW = freshwater)                | reference                    | remarks                      |
|------------------|-------------------|-----------------------|-------------------------------------------------------|------------------------------|------------------------------|
| AB721056         | SB15_2010         | Clade B, lineage B1   | FW – water purification plant, Japan                  | Fujimoto & Ohnishi – unpubl. | see Fig. 4 & 5               |
| EU567267         | sm27              | Clade B, lineage B1   | FW – stream sediment, New Zealand                     | Bass et al. 2009             | see Fig. 4 & 5               |
| EF586152         | 384-O16           | Clade B, lineage B1   | FW – stream biofilm, New Zealand                      | Dopheide et al. 2008         | > 98% identical to EU567267  |
| AB695521         | MPE2-27           | Clade B, lineage B2   | FW – lake moss pillars, Antarctica                    | Nakai et al. 2012            | see Fig. 4 & 5               |
| AY605200         | Sey055            | Clade B, lineage B2   | FW – stream sediment, Switzerland                     | Berney et al. 2004           | see Fig. 4 & 5               |
| AY605211         | Sey076            | Clade B, lineage B2   | FW – stream sediment, Switzerland                     | Berney et al. 2004           | < 1000 bp / not including V4 |
| AB622340         | K9MAY2010         | Clade B, lineage B3   | FW – lake plankton, Japan                             | Fujimoto & Ohnishi – unpubl. | see Fig. 4 & 5               |
| AY179971         | CCI78             | Clade B, lineage B3   | MA – salt marsh anoxic sediment/water interface, USA  | Stoeck & Epstein 2003        | see Fig. 4 & 5               |
| EU567269         | Rhiz_T11          | Clade B, lineage B3   | MA – Mediterranean Sea coastal oxic sediment, France  | Bass et al. 2009             | see Fig. 4 & 5               |
| FJ157330         | kor_110904_15     | Clade B, lineage B3   | FW – lake water column, Greece                        | Genitsaris et al. 2009       | see Fig. 4 & 5               |
| GU385680         | ME_Euk_FW80       | Clade B, lineage B3   | MA – associated with <i>Ascophyllum nodosum</i> , USA | Haska et al. 2012            | see Fig. 4 & 5               |
| GU385614 *       | ME_Euk_FW13       | Clade B, lineage B3   | MA – associated with <i>Ascophyllum nodosum</i> , USA | Haska et al. 2012            | > 98% identical to GU385680  |
| GU385615 *       | ME_Euk_FW14       | Clade B, lineage B3   | MA – associated with <i>Ascophyllum nodosum</i> , USA | Haska et al. 2012            | > 98% identical to GU385680  |
| GU385647 *       | ME_Euk_FW44       | Clade B, lineage B3   | MA – associated with <i>Ascophyllum nodosum</i> , USA | Haska et al. 2012            | > 98% identical to GU385680  |
| EU567268         | op14              | Clade B, lineage B4   | MA – oxic sediment, Panama                            | Bass et al. 2009             | see Fig. 4 & 5               |
| EU910611         | D47               | Clade B, lineage B5   | FW – sulfur-rich, hypoxic groundwater, USA            | Nold et al. 2010             | see Fig. 4 & 5               |
| EU910603         | D40               | Clade B, subclade T   | FW – sulfur-rich, hypoxic groundwater, USA            | Nold et al. 2010             | see Fig. 4 & S1A             |
| EF024704 *       | Elev_18S_1191     | Clade B, subclade T   | FW – trembling aspen rhizosphere, USA                 | Lesaulnier et al. 2008       | see Fig. 4 & S1A             |
| EF539120         | MB07.8            | Clade B, subclade T   | MA – semi-enclosed harbour picoplankton, China        | Cheung et al. 2008           | see Fig. S1A                 |
| EF539123         | MB07.45           | Clade B, subclade T   | MA – semi-enclosed harbour picoplankton, China        | Cheung et al. 2008           | > 98% identical to EF539120  |
| AY295738         | RD010517.43       | Clade B, subclade T   | MA – English Channel coastal picoplankton, France     | Romari & Vaulot 2004         | < 1000 bp / not including V4 |
| AY295737         | RD010517.42       | Clade B, subclade T   | MA – English Channel coastal picoplankton, France     | Romari & Vaulot 2004         | > 98% identical to AY295738  |
| FJ221401         | BTQB20030503.0020 | Clade B, subclade T   | MA – Atlantic estuary surface water, USA              | Caron et al. – unpubl.       | < 1000 bp / not including V4 |
| FJ221389         | BTQB20030503.0004 | Clade B, subclade T   | MA – Atlantic estuary surface water, USA              | Caron et al. – unpubl.       | > 98% identical to FJ221401  |
| FJ221415 *       | BTQB20030503.0040 | Clade B, subclade T   | MA – Atlantic estuary surface water, USA              | Caron et al. – unpubl.       | > 98% identical to FJ221401  |
| GU385686 *       | ME_Euk_FW88       | Clade B, subclade T   | MA – associated with <i>Ascophyllum nodosum</i> , USA | Haska et al. 2012            | < 1000 bp / not including V4 |
| JF775323         | TWII_I_42C_1g     | Clade B, subclade T   | FW – associated with tap water biofilm                | Valster et al. – unpubl.     | < 1000 bp / not including V4 |
| JF775334         | TWII_I_42C_3d     | Clade B, subclade T   | FW – associated with tap water biofilm                | Valster et al. – unpubl.     | < 1000 bp / not including V4 |
| JN585098         | SGB2_148          | Clade B, subclade T   | MA – picoplankton, China                              | Wu & Li – unpubl.            | < 1000 bp / not including V4 |
| GU479951         | PR4_3E_90         | Clade C, subclade P   | FW – mountain peat bog, Switzerland                   | Lara et al. 2011             | see Fig. 4 & S1B             |
| AF372743         | LEMD004           | Clade C, subclade P   | FW – anoxic lake sediment, USA                        | Dawson & Pace 2002           | see Fig. 4 & S1B             |
| AF372742         | LEMD682           | Clade C, subclade P   | FW – anoxic lake sediment, USA                        | Dawson & Pace 2002           | > 98% identical to AF372743  |
| AF372744         | LEMD052           | Clade C, subclade P   | FW – anoxic lake sediment, USA                        | Dawson & Pace 2002           | > 98% identical to AF372743  |

\* Chimeric sequences – see Supplementary Table S3 for details.

## References cited

- Bass D, Cavalier-Smith T. (2004). Phylum-specific environmental DNA analysis reveals remarkably high global biodiversity of Cercozoa (Protozoa). *Int J Syst Evol Microbiol* **54**: 2393-2404.
- Bass D, Chao EEY, Nikolaev S, Yabuki A, Ishida K, Berney C *et al.* (2009). Phylogeny of novel naked filose and reticulose Cercozoa: Granofilosea cl. n. and Proteomyxidea revised. *Protist* **160**: 75-109.
- Berney C, Fahrni J, Pawlowski J. (2004). How many novel eukaryotic 'kingdoms'? Pitfalls and limitations of environmental DNA surveys. *BMC Biol* **2**: 13.
- Brown PB, Wolfe GV. (2006). Protist genetic diversity in the acidic hydrothermal environments of Lassen Volcanic National Park, USA. *J Eukaryot Microbiol* **53**: 420-431.
- Chen M, Chen F, Xing P, Li H, Wu QL. (2010). Microbial eukaryotic community in response to *Microcystis* spp. bloom, as assessed by an enclosure experiment in Lake Taihu, China. *FEMS Microbiol Ecol* **74**: 19-31.
- Cheung MK, Chu KH, Li CP, Kwan HS, Wong CK. (2008). Genetic diversity of picoeukaryotes in a semi-enclosed harbour in the subtropical western Pacific. *Aquat Microb Ecol* **53**: 295-305.
- Dawson SC, Pace NR. (2002). Novel kingdom-level eukaryotic diversity in anoxic environments. *Proc Natl Acad Sci USA* **99**: 8324-8329.
- Dopheide A, Lear G, Stott R, Lewis G. (2008). Molecular characterization of ciliate diversity in stream biofilms. *Appl Environ Microbiol* **74**: 1740-1747.
- Genitsaris S, Kormas KA, Moustaka-Gouni M. (2009). Microscopic eukaryotes living in a dying lake (Lake Koronia, Greece). *FEMS Microbiol Ecol* **69**: 75-83.
- Haska CL, Yarish C, Kraemer G, Blaschik N, Whitlach R, Zhang H, Lin S. (2012). Bait worm packaging as a potential vector of invasive species. *Biol Invasions* **14**: 481-493.
- Kitajima S, Kamei K, Nishitani M, Sato H. (2010). Analysis of the eukaryotic community and metabolites found in clay wall material used in the construction of traditional Japanese buildings. *Biosci Biotechnol Biochem* **74**: 2083-2086.
- Lara E, Mitchell EAD, Moreira D, López García P. (2011). Highly diverse and seasonally dynamic protest community in a pristine peat bog. *Protist* **162**: 14-32.
- Lefranc M, Thénot A, Lepère C, Debroas D. (2005). Genetic diversity of small Eukaryotes in lakes differing by their trophic status. *Appl Environ Microbiol* **71**: 5935-5942.
- Lepère C, Domaizon I, Debroas D. (2007). Unexpected importance of potential parasites in the composition of the freshwater small-eukaryote community. *Appl Environ Microbiol* **74**: 2940-2949.
- Lesaulnier C, Papamichail D, McCorkle S, Ollivier B, Skiena S, Taghavi S *et al.* (2008). Elevated atmospheric CO<sub>2</sub> affects soil microbial diversity associated with trembling aspen *Environ Microbiol* **10**: 926-941.
- Nakai R, Abe T, Baba T, Imura S, Kagoshima H, Kanda H *et al.* (2012). Eukaryotic phylotypes in aquatic moss pillars inhabiting a freshwater lake in East Antarctica, based on 18S rRNA gene analysis. *Polar Biol* **35**: 1495-1504.
- Nold SC, Zajack HA, Biddanda BA. (2010). Eukaryal and archaeal diversity in a submerged sinkhole ecosystem influenced by sulfur-rich, hypoxic groundwater. *J Great Lakes Res* **36**: 366-375.
- Oikonomou A, Katsiapi M, Karayanni H, Moustaka-Gouni M, Kormas KA. (2012). Plakton microorganisms coinciding with two consecutive mass fish kills in a newly reconstructed lake. *ScientificWorldJournal* **2012**: 504135.
- Romari K, Vaulot D. (2004). Composition and temporal variability of picoeukaryote communities at a coastal site of the English Channel from 18S rDNA sequences. *Limnol Oceanogr* **49**: 784-798.
- Stoeck T, Epstein S. (2003). Novel eukaryotic lineages inferred from small-subunit rRNA analyses of oxygen-depleted marine environments. *Appl Environ Microbiol* **69**: 2657-2663.
