# Supplementary material
Source: PubMed Central journal article supplement (PMC3834849)
Supplement: ismej2013116x6.pdf [file ismej2013116x6.pdf]

**Vampires in the oceans: predatory cercozoan amoebae in marine habitats.**

Cédric Berney, Sarah Romac, Frédéric Mahé, Sébastien Santini, Raffaele Siano, and David Bass

**Supplementary Table S3. List of the chimeric environmental clone sequences detected in this study.**

| <b>GenBank accession number and clone name</b> | <b>position of the split</b>    | <b>identity of the 5' part</b> | <b>identity of the 3' part</b> |
|------------------------------------------------|---------------------------------|--------------------------------|--------------------------------|
| EF024704 - clone Elev_18S_1191                 | between positions 1200 and 1250 | Vampyrellida                   | Fungi                          |
| FJ221415 - clone BTQB20030503.0040             | between positions 300 and 350   | Vampyrellida                   | Bacillariophyta                |
| GU385614 - clone ME_Euk_FW13                   | between positions 1050 and 1100 | Ciliophora                     | Vampyrellida                   |
| GU385615 - clone ME_Euk_FW14                   | between positions 200 and 250   | Labyrinthulida                 | Vampyrellida                   |
| GU385647 - clone ME_Euk_FW44                   | between positions 200 and 250   | Labyrinthulida                 | Vampyrellida                   |
| GU385686 - clone ME_Euk_FW88 *                 | between positions 500 and 550 * | Vampyrellida                   | Bacillariophyta / Ciliophora * |

\* Clone ME\_Euk\_FW88 is a “double” chimera with the second split between positions 1150 and 1200.
