# Supplementary material
Source: PubMed Central journal article supplement (PMC3834849)
Supplement: ismej2013116x8.pdf [file ismej2013116x8.pdf]

## Vampires in the oceans: predatory cercozoan amoebae in marine habitats.

Cédric Berney, Sarah Romac, Frédéric Mahé, Sébastien Santini, Raffaele Siano, and David Bass

**Supplementary Table S5. List of the samples containing vampyrellid V4 sequences in the *BioMarks* data.**

| <u>sample ID</u> | <u>sampling session</u> | <u>sample type</u> | <u>size fraction</u> | <u>template</u> | <u>Sample ID</u> | <u>sampling session</u> | <u>sample type</u> | <u>size fraction</u> | <u>template</u> |
|------------------|-------------------------|--------------------|----------------------|-----------------|------------------|-------------------------|--------------------|----------------------|-----------------|
| S0005            | Naples 2009             | Sediment           | [total]              | cDNA            | S0124            | Varna 2010              | Sediment           | [total]              | DNA             |
| S0006            | Oslo 2009               | Sediment           | [total]              | cDNA            | S0125            | Naples 2009             | Subsurface         | [20-total]           | cDNA            |
| S0007            | Oslo 2009               | Sediment           | [total]              | DNA             | S0126            | Oslo 2009               | DCM                | [3-20]               | cDNA            |
| S0008            | Naples 2009             | Sediment           | [total]              | DNA             | S0127            | Oslo 2009               | DCM                | [0.8-3]              | cDNA            |
| S0009            | Oslo 2009               | Sediment           | [total]              | DNA             | S0128            | Oslo 2009               | DCM                | [20-2000]            | cDNA            |
| S0010            | Oslo 2009               | Sediment           | [total]              | cDNA            | S0129            | Oslo 2009               | Sediment           | [total]              | cDNA            |
| S0023            | Oslo 2009               | DCM                | [20-2000]            | DNA             | S0130            | Oslo 2009               | Sediment           | [total]              | cDNA            |
| S0027            | Oslo 2009               | DCM                | [0.8-3]              | DNA             | S0131            | Oslo 2009               | Subsurface         | [0.8-3]              | cDNA            |
| S0039            | Oslo 2009               | Subsurface         | [3-20]               | DNA             | S0132            | Oslo 2009               | Subsurface         | [3-20]               | cDNA            |
| S0042            | Naples 2009             | DCM                | [0.8-3]              | DNA             | S0134            | Oslo 2010               | Sediment           | [total]              | cDNA            |
| S0047            | Naples 2009             | Subsurface         | [3-20]               | DNA             | S0135            | Naples 2009             | Subsurface         | [20-total]           | DNA             |
| S0048            | Naples 2009             | DCM                | [3-20]               | cDNA            | S0136            | Oslo 2009               | DCM                | [3-20]               | DNA             |
| S0049            | Naples 2009             | DCM                | [3-20]               | DNA             | S0137            | Oslo 2009               | DCM                | [0.8-3]              | DNA             |
| S0050            | Naples 2009             | Subsurface         | [0.8-3]              | cDNA            | S0139            | Oslo 2009               | Sediment           | [total]              | DNA             |
| S0051            | Naples 2009             | Subsurface         | [0.8-3]              | DNA             | S0140            | Oslo 2009               | Sediment           | [total]              | DNA             |
| S0052            | Naples 2009             | DCM                | [0.8-3]              | cDNA            | S0141            | Oslo 2009               | Subsurface         | [0.8-3]              | DNA             |
| S0065            | Oslo 2009               | Subsurface         | [20-2000]            | cDNA            | S0142            | Oslo 2009               | Subsurface         | [3-20]               | DNA             |
| S0066            | Barcelona 2010          | Subsurface         | [3-20]               | cDNA            | S0144            | Oslo 2010               | Sediment           | [total]              | DNA             |
| S0068            | Barcelona 2010          | Sediment           | [total]              | cDNA            | S0147            | Naples 2009             | Sediment           | [total]              | cDNA            |
| S0070            | Roscoff 2010            | Subsurface         | [3-20]               | cDNA            | S0148            | Naples 2009             | Sediment           | [total]              | DNA             |
| S0072            | Roscoff 2010            | Sediment           | [total]              | cDNA            | S0161            | Naples 2009             | DCM                | [0.8-3]              | cDNA            |
| S0075            | Oslo 2009               | Subsurface         | [20-2000]            | DNA             | S0162            | Naples 2009             | DCM                | [0.8-3]              | cDNA            |
| S0076            | Barcelona 2010          | Subsurface         | [3-20]               | DNA             | S0163            | Naples 2009             | Subsurface         | [0.8-3]              | cDNA            |
| S0077            | Barcelona 2010          | Subsurface         | [0.8-3]              | DNA             | S0164            | Naples 2009             | DCM                | [20-total]           | cDNA            |
| S0078            | Barcelona 2010          | Sediment           | [total]              | DNA             | S0165            | Naples 2009             | DCM                | [3-20]               | cDNA            |
| S0082            | Roscoff 2010            | Sediment           | [total]              | DNA             | S0166            | Naples 2009             | Subsurface         | [3-20]               | cDNA            |
| S0089            | Naples 2010             | Sediment           | [total]              | cDNA            | S0167            | Naples 2009             | DCM                | [0.8-3]              | DNA             |
| S0090            | Varna 2010              | Subsurface         | [20-2000]            | cDNA            | S0168            | Naples 2009             | DCM                | [0.8-3]              | DNA             |
| S0099            | Naples 2010             | Sediment           | [total]              | DNA             | S0169            | Naples 2009             | Subsurface         | [0.8-3]              | DNA             |
| S0101            | Varna 2010              | Subsurface         | [3-20]               | DNA             | S0172            | Naples 2009             | Subsurface         | [3-20]               | DNA             |
| S0115            | Oslo 2010               | DCM                | [3-20]               | DNA             | S0237            | Roscoff 2010            | Subsurface         | [0-2000]             | DNA             |
| S0123            | Varna 2010              | Sediment           | [total]              | DNA             | S0288            | Oslo 2010               | Subsurface         | [0-0.2]              | DNA             |
