# Supplementary material
Source: PubMed Central journal article supplement (PMC3834849)
Supplement: ismej2013116x9.pdf [file ismej2013116x9.pdf]

Vampires in the oceans: predatory cercozoan amoebae in marine habitats.

Cédric Berney, Sarah Romac, Frédéric Mahé, Sébastien Santini, Raffaele Siano, and David Bass

Supplementary Figure S1

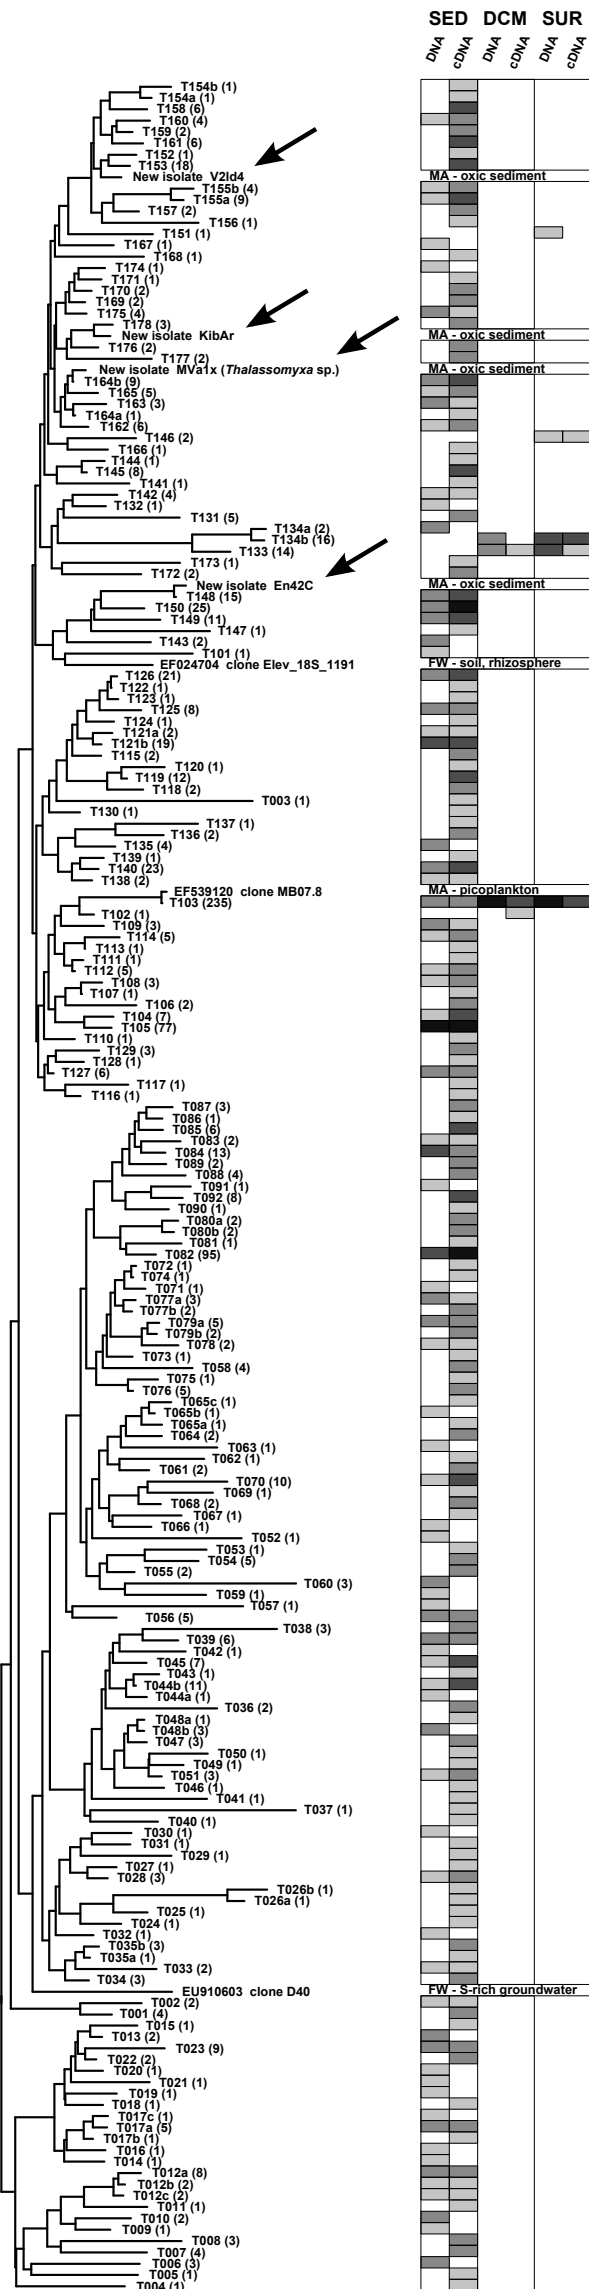

**A**

subclade T

**B**

subclade P

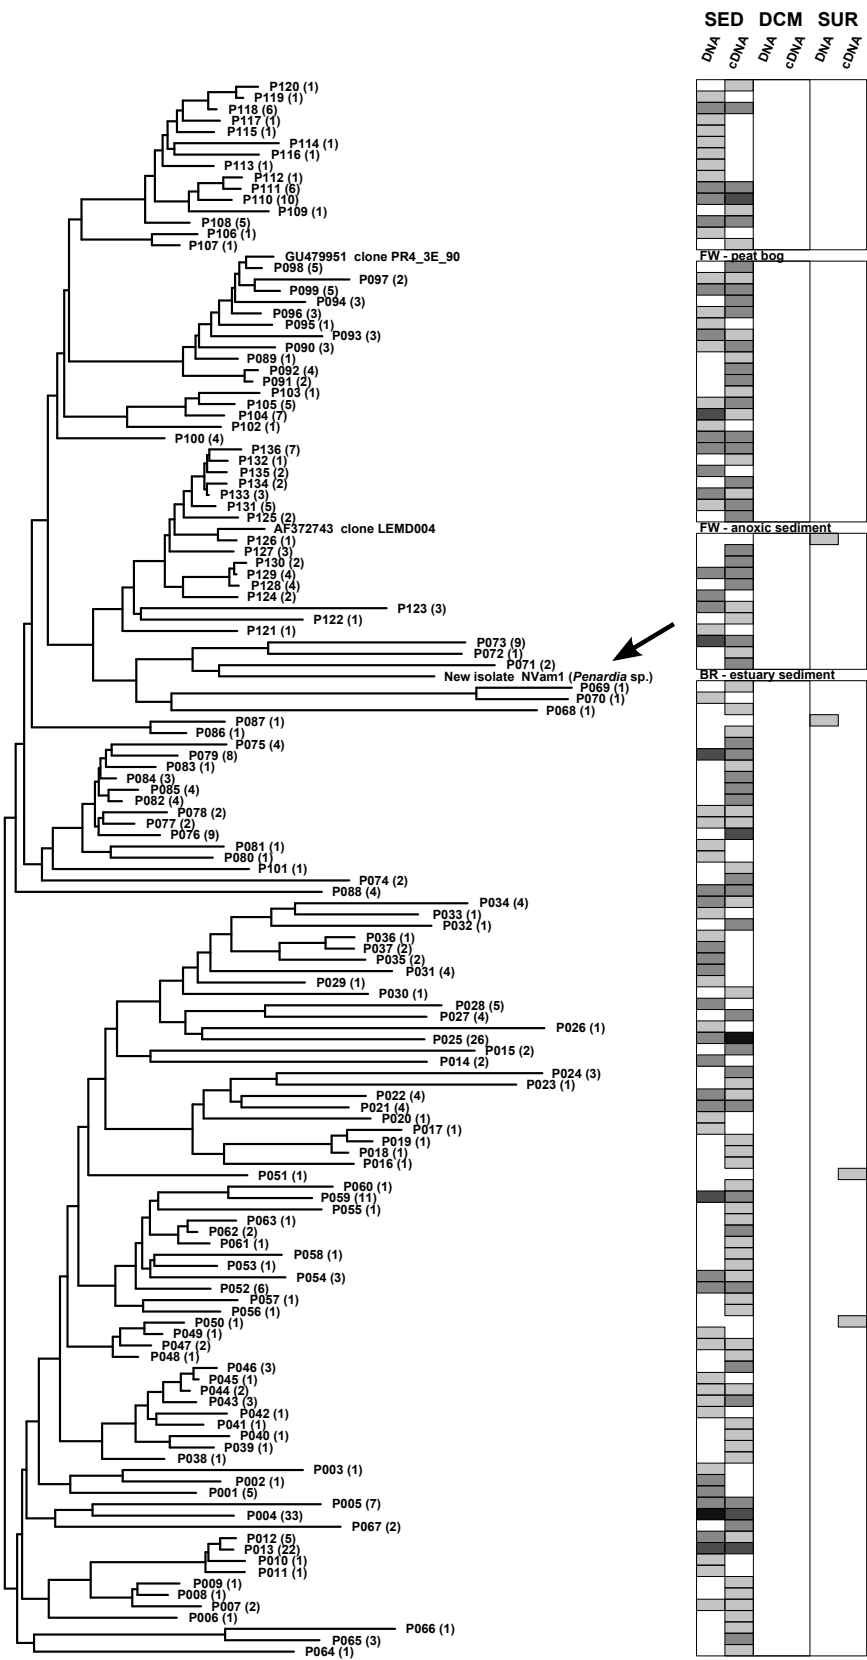

0.1
